# Supplementary material
Source: PubMed Central journal article supplement (PMC7497636)
Supplement: jo9b02530_si_001.pdf [file jo9b02530_si_001.pdf]

## Allylic-allylic alkylation with 3,5-dimethyl-4-nitroisoxazole. A route to dicarboxylic acid derivatives

by

Dorota Kowalczyk-Dworak,<sup>a</sup> Marcin Kwit<sup>b</sup> and Łukasz Albrecht<sup>a,\*</sup>

<sup>a</sup> Institute of Organic Chemistry, Faculty of Chemistry, Lodz University of Technology, Żeromskiego 116, 90-924 Łódź, Poland

<sup>b</sup> Department of Chemistry, Adam Mickiewicz University, Uniwersytetu Poznańskiego 8, 61-614 Poznań, Poland

E-mail: [lukasz.albrecht@p.lodz.pl](mailto:lukasz.albrecht@p.lodz.pl)

### Supporting Information

|                                         |     |
|-----------------------------------------|-----|
| 1. Screening results                    | S2  |
| 2. Additional scope experiments         | S4  |
| 3. Assignment of absolute configuration | S5  |
| 4. NMR data                             | S51 |
| 5. HPLC traces                          | S68 |

## 1. Screening results

### 1.1. Catalyst screening

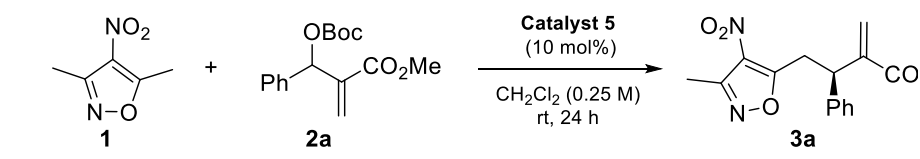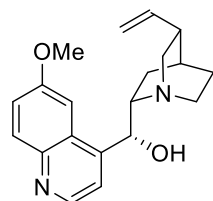

**5a**  
**3a**: 26% yield  
60:40 er

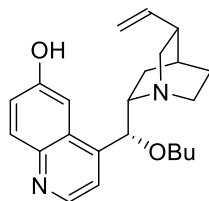

**5b**  
**3a**: 22% yield  
81:19 er

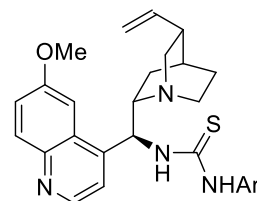

**5c**  
Ar: 3,5-( $\text{CF}_3$ )<sub>2</sub> $\text{C}_6\text{H}_3$   
**3a**: <5% conv.

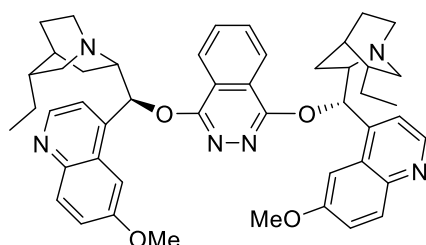

**5d**  
**3a**: 22% yield  
79:21 er

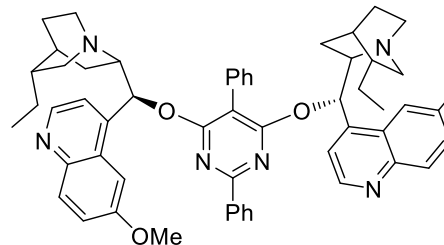

**5e**  
**3a**: 41% yield  
88:12 er

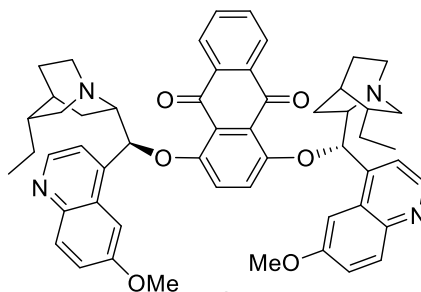

**5f**  
**3a**: 43% yield  
90:10 er

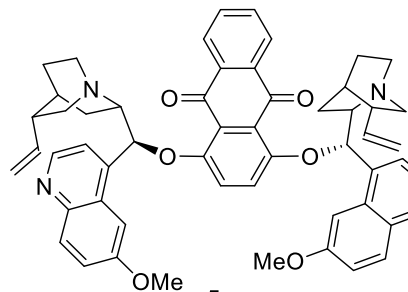

**5g**  
**3a**: 38% yield  
76:24 er

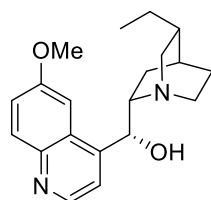

**5h**  
**3a**: 22% yield  
77:23 er

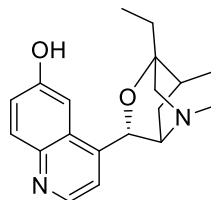

**5i**  
**3a**: 32% yield  
56:44 er

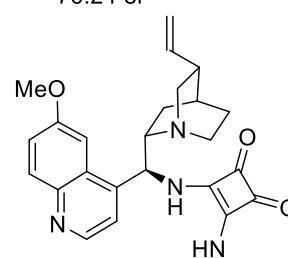

**5j**  
Ar: 3,5-( $\text{CF}_3$ )<sub>2</sub> $\text{C}_6\text{H}_3$   
**3a**: <5% conv.

## 1.2. Reaction conditions screening<sup>[a]</sup>

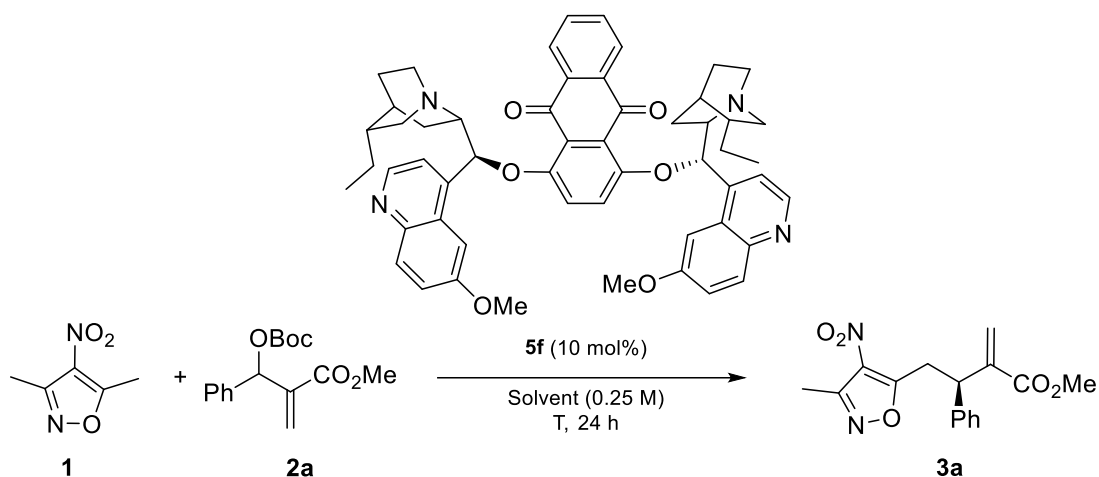

| Entry             | Solvent                              | T [°C] <sup>[b]</sup> | Yield [%] | er <sup>[c]</sup> |
|-------------------|--------------------------------------|-----------------------|-----------|-------------------|
| 1                 | CH <sub>2</sub> Cl <sub>2</sub>      | rt                    | 43        | 90:10             |
| 2                 | CHCl <sub>3</sub>                    | rt                    | 69        | 91:9              |
| 3                 | ClCH <sub>2</sub> CH <sub>2</sub> Cl | rt                    | 40        | 86:14             |
| 4                 | Toluene                              | rt                    | 19        | 89:11             |
| 5                 | THF                                  | rt                    | 36        | 87:13             |
| 6                 | 1,4-Dioxane                          | rt                    | >5        | nd                |
| 7                 | AcOCH <sub>3</sub>                   | rt                    | 39        | 84:16             |
| 8                 | CH <sub>3</sub> CN                   | rt                    | 80        | 89:11             |
| 9 <sup>[d]</sup>  | CHCl <sub>3</sub>                    | rt                    | 41        | 89:11             |
| 10 <sup>[e]</sup> | CHCl <sub>3</sub>                    | rt                    | 66        | 90:10             |
| 11                | CHCl <sub>3</sub>                    | 60                    | 78        | 90:10             |
| 12                | CHCl <sub>3</sub>                    | 50                    | 85        | 92:8              |
| 13                | CHCl <sub>3</sub>                    | 40                    | 84        | 96:4              |
| 14                | CHCl <sub>3</sub>                    | 10                    | 20        | 92:8              |
| 15                | CHCl <sub>3</sub>                    | 0                     | -         | -                 |
| 16 <sup>[f]</sup> | CHCl <sub>3</sub>                    | 40                    | 82        | 92:8              |
| 17 <sup>[g]</sup> | CHCl <sub>3</sub>                    | 40                    | 50        | 92:8              |
| 18 <sup>[h]</sup> | CHCl <sub>3</sub>                    | 40                    | 81        | 91:9              |
| 19 <sup>[i]</sup> | CHCl <sub>3</sub>                    | 40                    | 79        | 93:7              |

[a] Reactions performed on 0.1 mmol scale using **1** (1 equiv) and **2a** (1 equiv) in 0.4 mL of the solvent. [b] Isolated yields are given. [c] Determined by a chiral stationary phase HPLC. [d] Reaction was performed in 0.8 mL of CH<sub>2</sub>Cl<sub>2</sub>. [e] Reaction was performed in 0.2 mL of CH<sub>2</sub>Cl<sub>2</sub>. [f] Reaction was performed using **5f** (20 mol%). [g] Reaction was performed using **5f** (5 mol%). [h] Reaction was performed using **1** (1.5 equiv). [i] Reaction was performed using **2a** (1.5 equiv).

## 2. Additional scope experiments

Following the general procedure (given in the manuscript file), further scope studies were performed to include isatin-derived MBH carbonate **2n** and 3,5-dimethyl-4-nitroisoxazole **1a** or 3,5-diethyl-4-nitroisoxazole **1b**. Absolute and relative configuration of the products was not assigned.

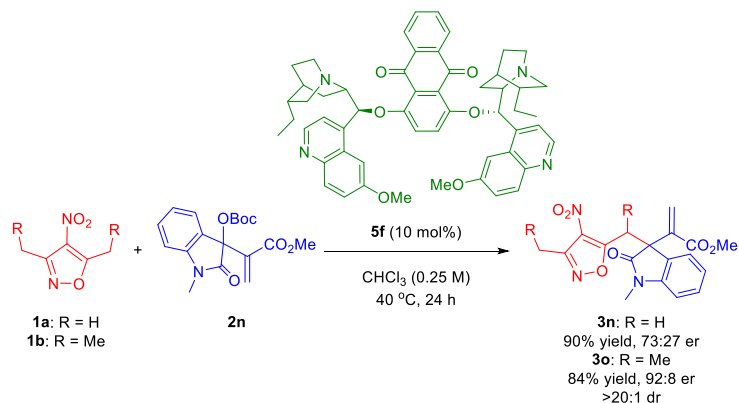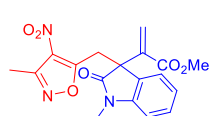

### **3n** (R)-Methyl 2-(1-methyl-3-((3-methyl-4-nitroisoxazol-5-yl)methyl)-2-oxoindolin-3-yl)acrylate

Following the general procedure (given in the manuscript file), **3n** was isolated by FC on silica (hexane/ethyl acetate 20:1) in 90% yield as a pale-yellow oil.  $^1\text{H}$  NMR (700 MHz,  $\text{CDCl}_3$ )  $\delta$  7.23 (td,  $J = 7.7, 1.2$  Hz, 1H), 7.13 (d,  $J = 7.7$  Hz, 1H), 6.94 (td,  $J = 7.7, 0.8$  Hz, 1H), 6.75 (d,  $J = 7.7$  Hz, 1H), 6.62 (s, 1H), 6.17 (s, 1H), 4.34 (d,  $J = 14.2$  Hz, 1H), 3.80 (d,  $J = 14.2$  Hz, 1H), 3.63 (s, 3H), 3.22 (s, 3H), 2.38 (s, 3H).  $^{13}\text{C}$  NMR (176 MHz,  $\text{CDCl}_3$ )  $\delta$  176.0, 169.5, 165.3, 155.2, 143.9, 138.5, 129.5, 129.2 (2C), 128.2, 123.5, 122.8, 108.4, 54.2, 52.4, 32.3, 26.8, 11.6. HRMS (ESI-TOF)  $m/z$ :  $[\text{M}+\text{H}]^+$  Calcd for  $\text{C}_{18}\text{H}_{18}\text{N}_3\text{O}_6$  372.1191; Found: 372.1204. The er was determined by UPC<sup>2</sup> using a chiral Chiralpack IA column gradient from 100%  $\text{CO}_2$  up to 40%; *i*-PrOH, flow rate 2.5 mL/min;  $\tau_{\text{major}} = 3.1$  min,  $\tau_{\text{minor}} = 2.8$  min (73:27 er).  $[\alpha]_D^{20} = -132.3$  ( $c = 0.7$ ,  $\text{CHCl}_3$ ).

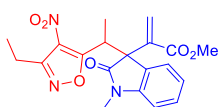

### **3o** Methyl 2-((R)-3-((S)-1-(3-ethyl-4-nitroisoxazol-5-yl)ethyl)-1-methyl-2-oxoindolin-3-yl)acrylate

Following the general procedure (given in the manuscript file), **3o** was isolated by FC on silica (hexane/ethyl acetate 20:1) in 84% yield as a pale-yellow oil.  $^1\text{H}$  NMR (700 MHz,  $\text{CDCl}_3$ )  $\delta$  7.25 (d,  $J = 7.7$  Hz, 1H), 7.16 (td,  $J = 7.7, 1.2$  Hz, 1H), 6.89 (td,  $J = 7.6, 1.0$  Hz, 1H), 6.65 (d,  $J = 7.7$  Hz, 1H), 6.58 (s, 1H), 6.12 (s, 1H), 5.28 (q,  $J = 7.2$  Hz, 1H), 3.68 (s, 3H), 3.22 (s, 3H), 2.75 (q,  $J = 7.4$  Hz, 2H), 1.58 (d,  $J = 7.2$  Hz, 3H), 1.12 (t,  $J = 7.4$  Hz, 3H).  $^{13}\text{C}$  NMR (176 MHz,  $\text{CDCl}_3$ )  $\delta$  175.2, 174.1, 165.9, 159.5, 143.3, 137.8, 129.3, 129.2, 128.4 (2C), 123.8, 122.6, 108.1, 56.9, 52.4, 37.0, 26.6, 19.6, 12.8, 11.5. HRMS (ESI-TOF)  $m/z$ :  $[\text{M}+\text{H}]^+$  Calcd for  $\text{C}_{20}\text{H}_{22}\text{N}_3\text{O}_6$ : 400.1504; Found: 400.1514. The er was determined by UPC<sup>2</sup> using a chiral Chiralpack IA column gradient from 100%  $\text{CO}_2$  up to 40%; *i*-PrOH, flow rate 2.5 mL/min;  $\tau_{\text{major}} = 5.6$  min,  $\tau_{\text{minor}} = 6.3$  min (92:8 er).  $[\alpha]_D^{20} = -121.3$  ( $c = 0.8$ ,  $\text{CHCl}_3$ ).

### 3. Assignment of absolute configuration

#### Computational details

The theoretical approach we used in this work is common to all studied structures and includes (i) conformational search at molecular mechanics level (MM3); (ii) pre-optimization at the B3LYP/6-31G(d) level; (iii) re-optimization of conformers found at low-DFT level at B3LYP/6-311++G(d,p) level followed by frequency calculations to confirm stability of received structures; (iv) calculations on relative energies ( $\Delta E_{\text{DFT}}$  and  $\Delta\Delta G_{\text{DFT}}$ ) using Boltzmann distribution at  $T = 298.15$  K; (v) rotator strengths calculations at the TD-DFT/6-311++G(d,p) level for all stable conformers of relative energies ranging from 0.0 to 2.0 kcal mol<sup>-1</sup>.

Preliminary conformer distribution search was performed by the Scigress package<sup>[1]</sup> using the MM3 molecular mechanics force field. All possible conformers were analyzed using the systematic search methodology. Minimum energy conformers of relative steric energies ( $\Delta E_{\text{SE}}$ ) up to 10 kcal mol<sup>-1</sup> found by molecular mechanics were further fully optimized at the B3LYP/6-31G(d) level as implemented in the Gaussian09 package.<sup>[2]</sup> Higher accuracy calculations were performed at the B3LYP/6-311++G(d,p) level.

The conformers obtained at the B3LYP/6-311++G(d,p) level were the real minima (no imaginary frequencies have been found). Total and free energy values have been calculated and used to obtain the Boltzmann population of conformers at 298.15 K. Only the results for conformers that differ from the most stable one by less than 2 kcal mol<sup>-1</sup> have been taken into account for further calculations, following a generally accepted protocol.<sup>[3]</sup>

The TD-DFT/6-311++G(2d,2p) calculations of ECD of **3a** and **3g** were performed for all structures re-optimized at higher level of theory. We used two different density functionals for calculations of rotatory strengths, namely CAM-B3LYP<sup>[4]</sup> and M06-2X functional.<sup>[5]</sup> Rotatory strengths were calculated using both length and velocity representations. In the present study, the differences between the length and velocity representations of the calculated values of rotatory strengths were quite small, and for this reason only the velocity representations were further used. The CD spectra were simulated by overlapping Gaussian functions for each transition according to the procedure previously described and using half band width 0.4 eV.<sup>[6]</sup> It should be noted, that there are not substantial differences between ECD spectra calculated with these two functionals for the same molecule, therefore we discussed here only results obtained with the use of CAM-B3LYP functional. Many authors indicate CAM-B3LYP functional as the best suited for TD-DFT calculations. The results obtained with the use of CAM-B3LYP functional are comparable to results obtained with the use of more sophisticated EOM-CCSD method.<sup>[7-11]</sup>

The solvent effect on structure and ECD spectra was not taken into account, since the experimental ECD measurements were done in non-polar cyclohexane.

#### References:

[1] Scigress 2.5, Fujitsu Ltd.

[2] Gaussian 09, Revision A.1, M. J. Frisch, G. W. Trucks, H. B. Schlegel, G. E. Scuseria, M. A. Robb, J. R. Cheeseman, G. Scalmani, V. Barone, B. Mennucci, G. A. Petersson, H. Nakatsuji, M. Caricato, X. Li, H. P. Hratchian, A. F. Izmaylov, J. Bloino, G. Zheng, J. L. Sonnenberg, M. Hada, M. Ehara, K. Toyota, R. Fukuda, J. Hasegawa, M. Ishida, T. Nakajima, Y. Honda, O. Kitao, H. Nakai, T. Vreven, J. A. Montgomery, Jr., J. E. Peralta, F. Ogliaro, M. Bearpark, J. J. Heyd, E. Brothers, K. N. Kudin, V. N. Staroverov, R. Kobayashi, J. Normand, K. Raghavachari, A. Rendell, J. C. Burant, S. S. Iyengar, J. Tomasi, M. Cossi, N. Rega, J. M.

- Millam, M. Klene, J. E. Knox, J. B. Cross, V. Bakken, C. Adamo, J. Jaramillo, R. Gomperts, R. E. Stratmann, O. Yazyev, A. J. Austin, R. Cammi, C. Pomelli, J. W. Ochterski, R. L. Martin, K. Morokuma, V. G. Zakrzewski, G. A. Voth, P. Salvador, J. J. Dannenberg, S. Dapprich, A. D. Daniels, Ö. Farkas, J. B. Foresman, J. V. Ortiz, J. Cioslowski, and D. J. Fox, Gaussian, Inc., Wallingford CT, **2009**.
- [3] Kwit, M.; Rozwadowska, M. D.; Gawroński, J.; Grajewska A. Density Functional Theory Calculations of the Optical Rotation and Electronic Circular Dichroism: The Absolute Configuration of the Highly Flexible *trans*-Isocytosazone Revised. *J. Org. Chem.* **2009**, *74*, 8051-8063 and references therein.
- [4] Yanai, T.; Tew, D.; Handy, N. A new hybrid exchange-correlation functional using the Coulomb-attenuating method (CAM-B3LYP). *Chem. Phys. Lett.* **2004**, *393*, 51-57.
- [5] Zhao, Y.; Truhlar, D. G. The M06 suite of density functionals for main group thermochemistry, thermochemical kinetics, noncovalent interactions, excited states, and transition elements: two new functionals and systematic testing of four M06-class functionals and 12 other functionals. *Theor. Chem. Acc.* **2008**, *120*, 215-241.
- [6] Harada, N.; Stephens, P. J. ECD Cotton effect approximated by the Gaussian curve and other methods. *Chirality* **2010**, *22*, 229-233.
- [7] Adamo, C.; Jacquemin, D. The calculations of excited-state properties with Time-Dependent Density Functional Theory. *Chem. Soc. Rev.*, **2013**, *42*, 845-856.
- [8] Laurent, A. D.; Jacquemin, D. TD-DFT Benchmarks: A Review. *Int. J. Quan. Chem.* **2013**, *113*, 2019–2039.
- [9] Pescitelli, G.; Bruhn, T. Good Computational Practice in the Assignment of Absolute Configurations by TDDFT Calculations of ECD Spectra. *Chirality*, **2016**, *28*, 466–474.
- [10] Sneskov, K.; Christiansen, O. Excited state coupled cluster methods. *WIREs Comput. Mol. Sci.* **2012**, *2*, 566–584.
- [11] Caricato, M.; Trucks, G. W.; Frisch, M. J.; Wiberg, K. B. Oscillator Strength: How Does TDDFT Compare to EOM-CCSD? *J. Chem. Theory Comput.* **2011**, *7*, 456–466.

**Table S1.** Total and Gibbs free energies ( $E$ ,  $\Delta G$ , in Hartree), relative energies ( $\Delta E$ ,  $\Delta\Delta G$ , in kcal mol<sup>-1</sup>),  $\Delta E$ - and  $\Delta\Delta G$ -based percentage populations ( $\% \Delta E$ ,  $\% \Delta\Delta G$ ) and numbers of imaginary frequencies (#ImFreq) calculated at B3LYP/6-311++G(d,p) level for individual conformers of **3a**.

| Conf. no. <sup>[a]</sup> | $E$         | $\Delta G$  | $\Delta E$ | $\% \Delta E$ | $\Delta\Delta G$ | $\% \Delta\Delta G$ | #ImFreq |
|--------------------------|-------------|-------------|------------|---------------|------------------|---------------------|---------|
| 1                        | -1105.15135 | -1104.90364 | 0.62       | 8.41          | 0.19             | 12.6                | 0       |
| 2                        | -1105.14993 | -1104.90229 | 1.51       | 1.87          | 1.04             | 3.01                | 0       |
| 3                        | -1105.15082 | -1104.90249 | 0.95       | 4.8           | 0.92             | 3.71                | 0       |
| 4                        | -1105.15064 | -1104.90307 | 1.07       | 3.96          | 0.55             | 6.85                | 0       |
| 5                        | -1105.15106 | -1104.90255 | 0.80       | 6.21          | 0.88             | 3.98                | 0       |
| 6                        | -1105.15234 | -1104.90395 | 0.00       | 24.05         | 0.00             | 17.47               | 0       |
| 7                        | -1105.14934 | -1104.9026  | 1.88       | 1.01          | 0.85             | 4.18                | 0       |
| 8                        | -1105.15107 | -1104.90294 | 0.79       | 6.28          | 0.63             | 5.98                | 0       |
| 9                        | -1105.15121 | -1104.90325 | 0.71       | 7.3           | 0.44             | 8.30                | 0       |
| 10                       | -1105.14889 | -1104.90088 | 2.16       | -             | 1.93             | 0.68                | 0       |
| 11                       | -1105.15084 | -1104.90266 | 0.94       | 4.93          | 0.81             | 4.46                | 0       |
| 13                       | -1105.15182 | -1104.90349 | 0.33       | 13.85         | 0.29             | 10.76               | 0       |
| 14                       | -1105.14922 | -1104.90112 | 1.96       | 0.88          | 1.77             | 0.88                | 0       |
| 15                       | -1105.15091 | -1104.90307 | 0.89       | 5.31          | 0.55             | 6.92                | 0       |
| 17                       | -1105.15085 | -1104.90268 | 0.93       | 4.96          | 0.8              | 4.55                | 0       |
| 21                       | -1105.15055 | -1104.9023  | 1.12       | 3.6           | 1.03             | 3.05                | 0       |
| 23                       | -1105.14954 | -1104.90083 | 1.75       | 1.24          | 1.96             | 0.64                | 0       |
| 24                       | -1105.14875 | -1104.90132 | 2.25       | -             | 1.65             | 1.08                | 0       |
| 25                       | -1105.1496  | -1104.90118 | 1.72       | 1.32          | 1.74             | 0.93                | 0       |

[a] Conformers are numbered according to their appearance during conformational search.

**Table S2.** Total and Gibbs free energies ( $E$ ,  $\Delta G$ , in Hartree), relative energies ( $\Delta E$ ,  $\Delta\Delta G$ , in kcal mol<sup>-1</sup>),  $\Delta E$ - and  $\Delta\Delta G$ -based percentage populations ( $\% \Delta E$ ,  $\% \Delta\Delta G$ ) and numbers of imaginary frequencies (#ImFreq) calculated at B3LYP/6-311++G(d,p) level for individual conformers of **3g**

| Conf.<br>no. <sup>[a]</sup> | $E$         | $\Delta G$  | $\Delta E$ | $\% \Delta E$ | $\Delta\Delta G$ | $\% \Delta\Delta G$ | #ImFreq |
|-----------------------------|-------------|-------------|------------|---------------|------------------|---------------------|---------|
| 1                           | -1144.48094 | -1144.20917 | 0.61       | 9.47          | 0.24             | 13.47               | 0       |
| 2                           | -1144.47951 | -1144.20744 | 1.5        | 2.08          | 1.33             | 2.13                | 0       |
| 3                           | -1144.48042 | -1144.20787 | 0.93       | 5.45          | 1.05             | 3.39                | 0       |
| 4                           | -1144.48021 | -1144.20882 | 1.06       | 4.38          | 0.46             | 9.23                | 0       |
| 5                           | -1144.48069 | -1144.2079  | 0.76       | 7.29          | 1.04             | 3.49                | 0       |
| 6                           | -1144.48191 | -1144.20955 | 0          | 26.36         | 0                | 20.04               | 0       |
| 7                           | -1144.47891 | -1144.20782 | 1.88       | 1.1           | 1.09             | 3.19                | 0       |
| 8                           | -1144.48058 | -1144.20829 | 0.83       | 6.47          | 0.79             | 5.26                | 0       |
| 9                           | -1144.48075 | -1144.20888 | 0.73       | 7.73          | 0.42             | 9.89                | 0       |
| 10                          | -1144.47848 | -1144.20646 | 2.15       | -             | 1.94             | 0.76                | 0       |
| 11                          | -1144.48047 | -1144.20784 | 0.9        | 5.74          | 1.07             | 3.27                | 0       |
| 13                          | -1144.48133 | -1144.20916 | 0.36       | 14.37         | 0.25             | 13.22               | 0       |
| 15                          | -1144.47869 | -1144.20654 | 2.02       | -             | 1.89             | 0.82                | 0       |
| 17                          | -1144.48042 | -1144.20858 | 0.94       | 5.43          | 0.61             | 7.16                | 0       |
| 19                          | -1144.47795 | -1144.20639 | 2.49       | -             | 1.98             | 0.7                 | 0       |
| 21                          | -1144.48016 | -1144.20784 | 1.1        | 4.14          | 1.07             | 3.28                | 0       |
| 22                          | -1144.47688 | -1144.20637 | 3.15       | -             | 1.99             | 0.69                | 0       |

[a] Conformers are numbered according to their appearance during conformational search.



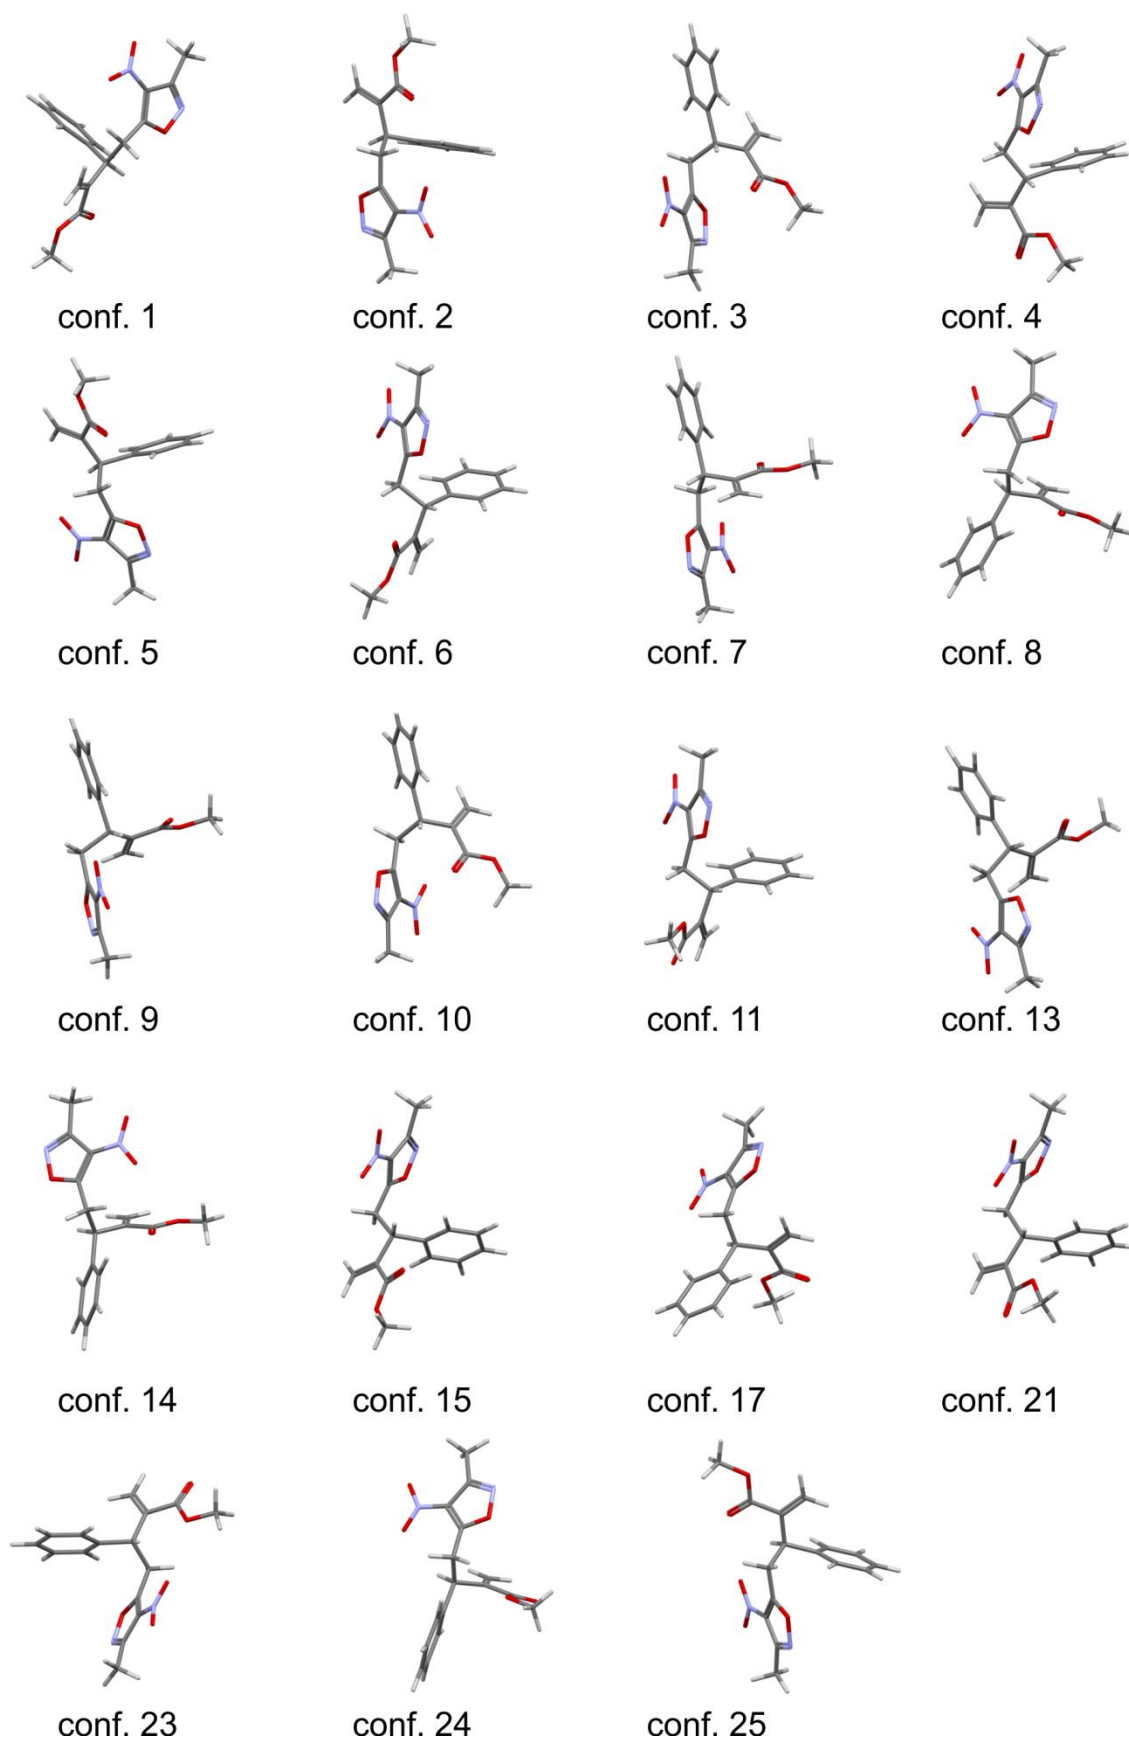

**Figure S1.** Structures of individual, low-energy conformers of **3a**, calculated at the B3LYP/6-311++G(d,p) level of theory

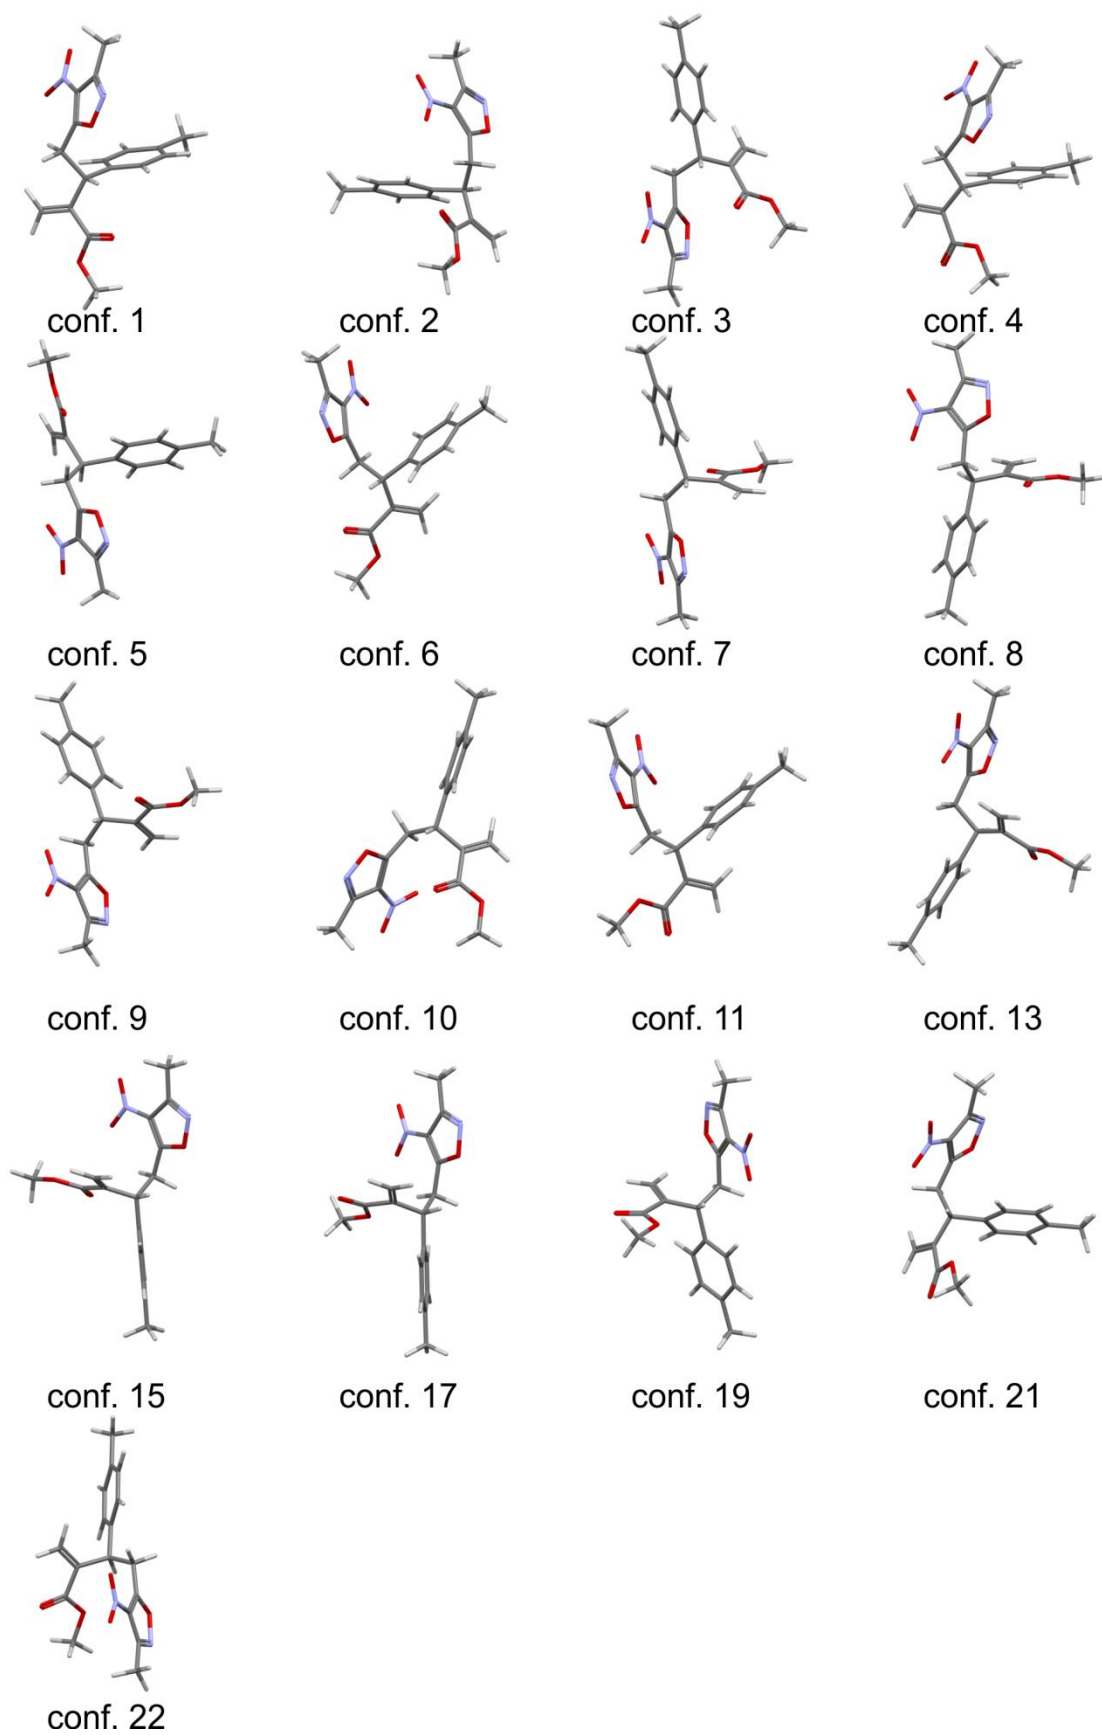

**Figure S2.** Structures of individual, low-energy conformers of **3g**, calculated at the B3LYP/6-311++G(d,p) level of theory

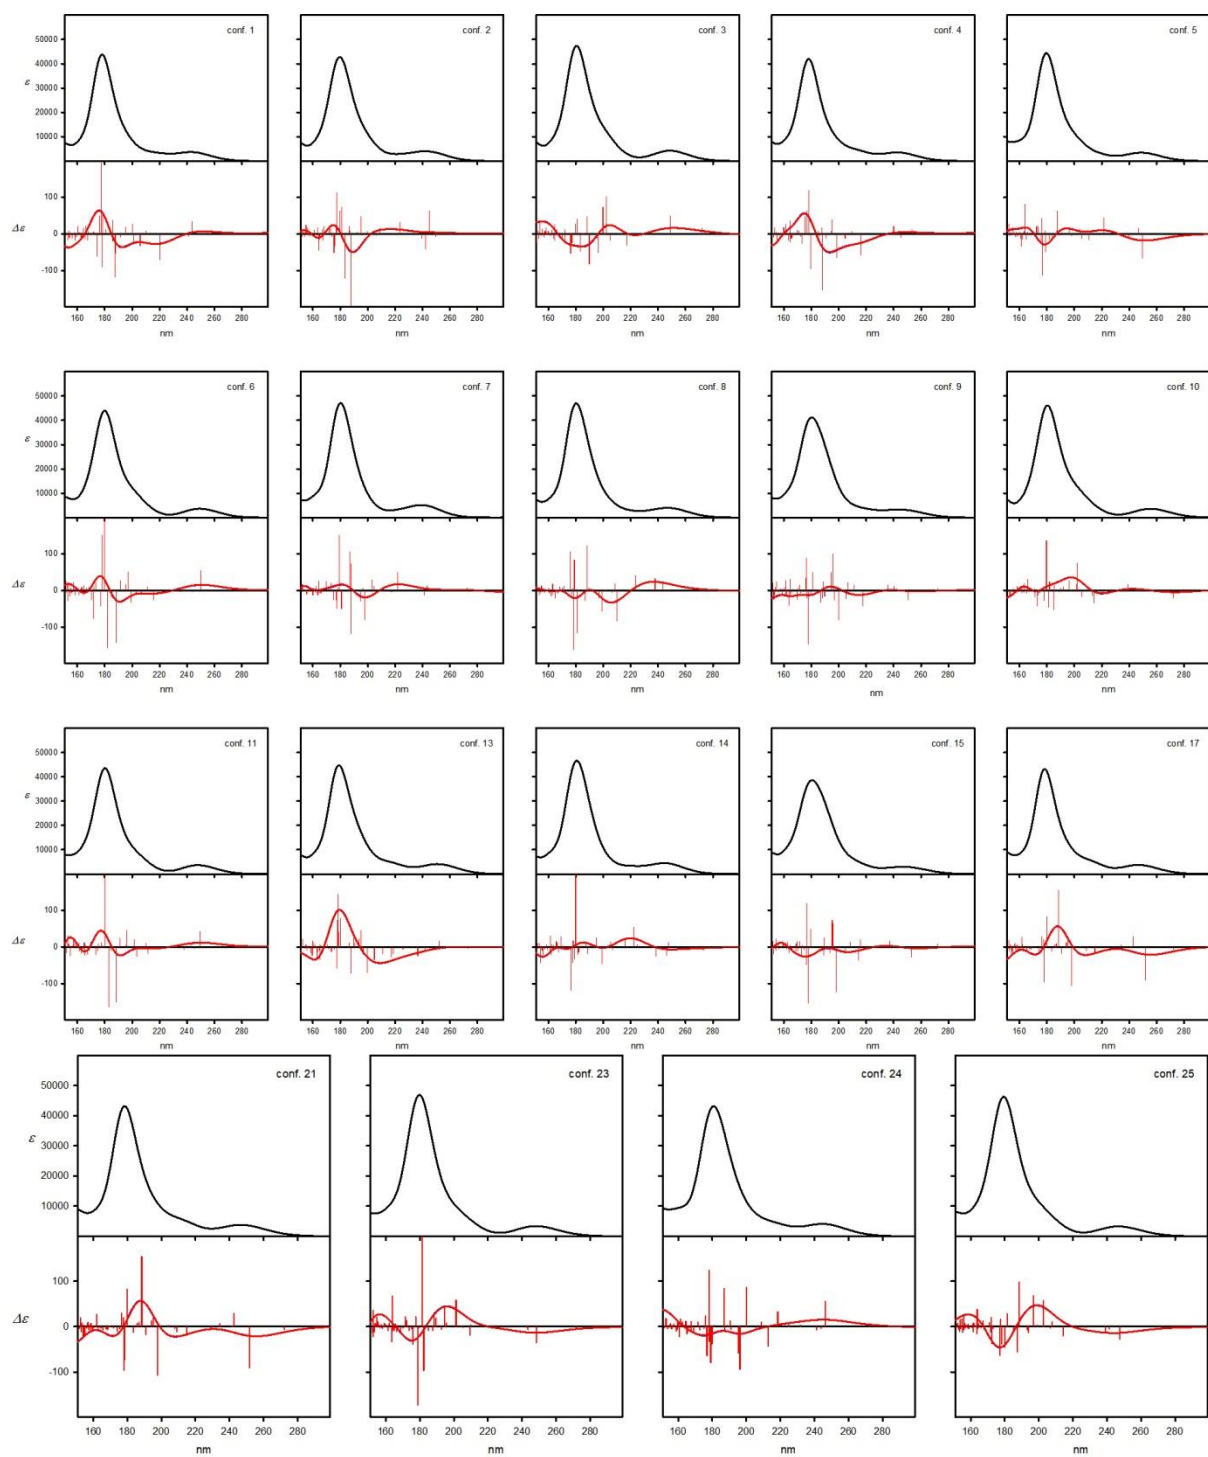

**Figure S3.** UV and ECD spectra of the low-energy conformers of compound **3a** calculated at TD-CAM-B3LYP/6-311++G(2d,2p) level for structures optimized at B3LYP/6-311++G(d,p) level. Wavelengths have not been corrected

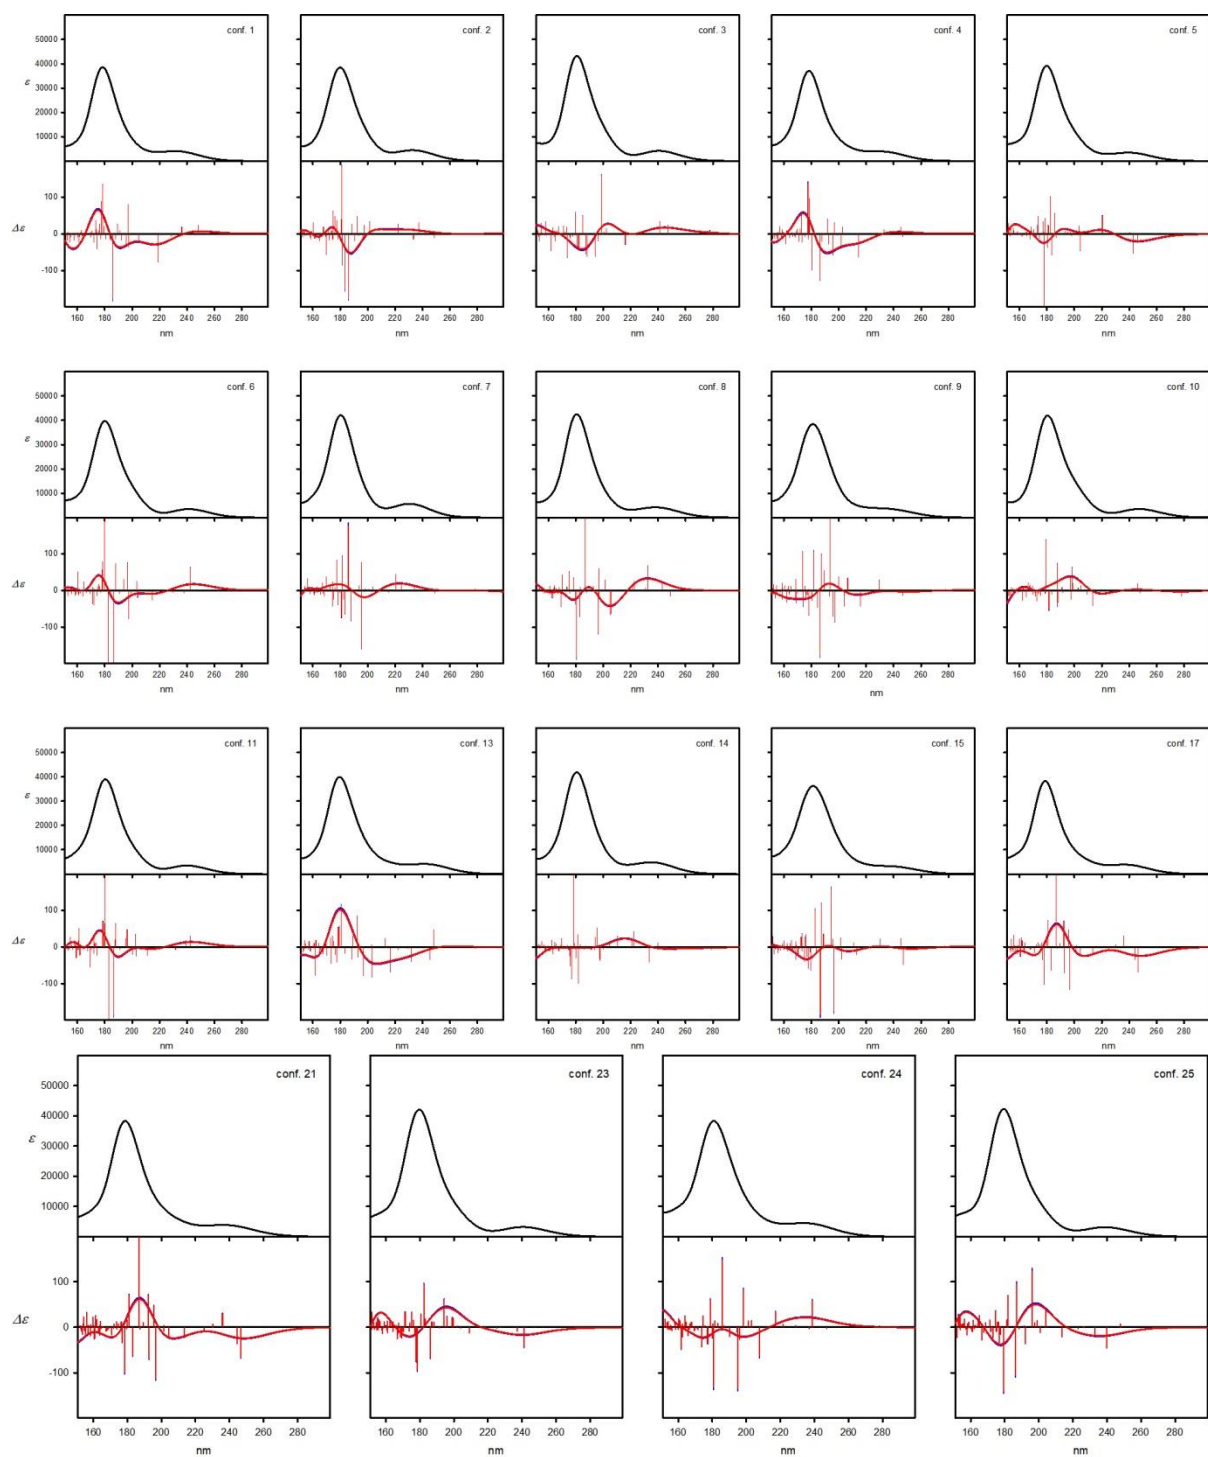

**Figure S4.** UV and ECD spectra of the low-energy conformers of compound **3a** calculated at TD-M06-2X/6-311++G(2d,2p) level for structures optimized at B3LYP/6-311++G(d,p) level. Wavelengths have not been corrected

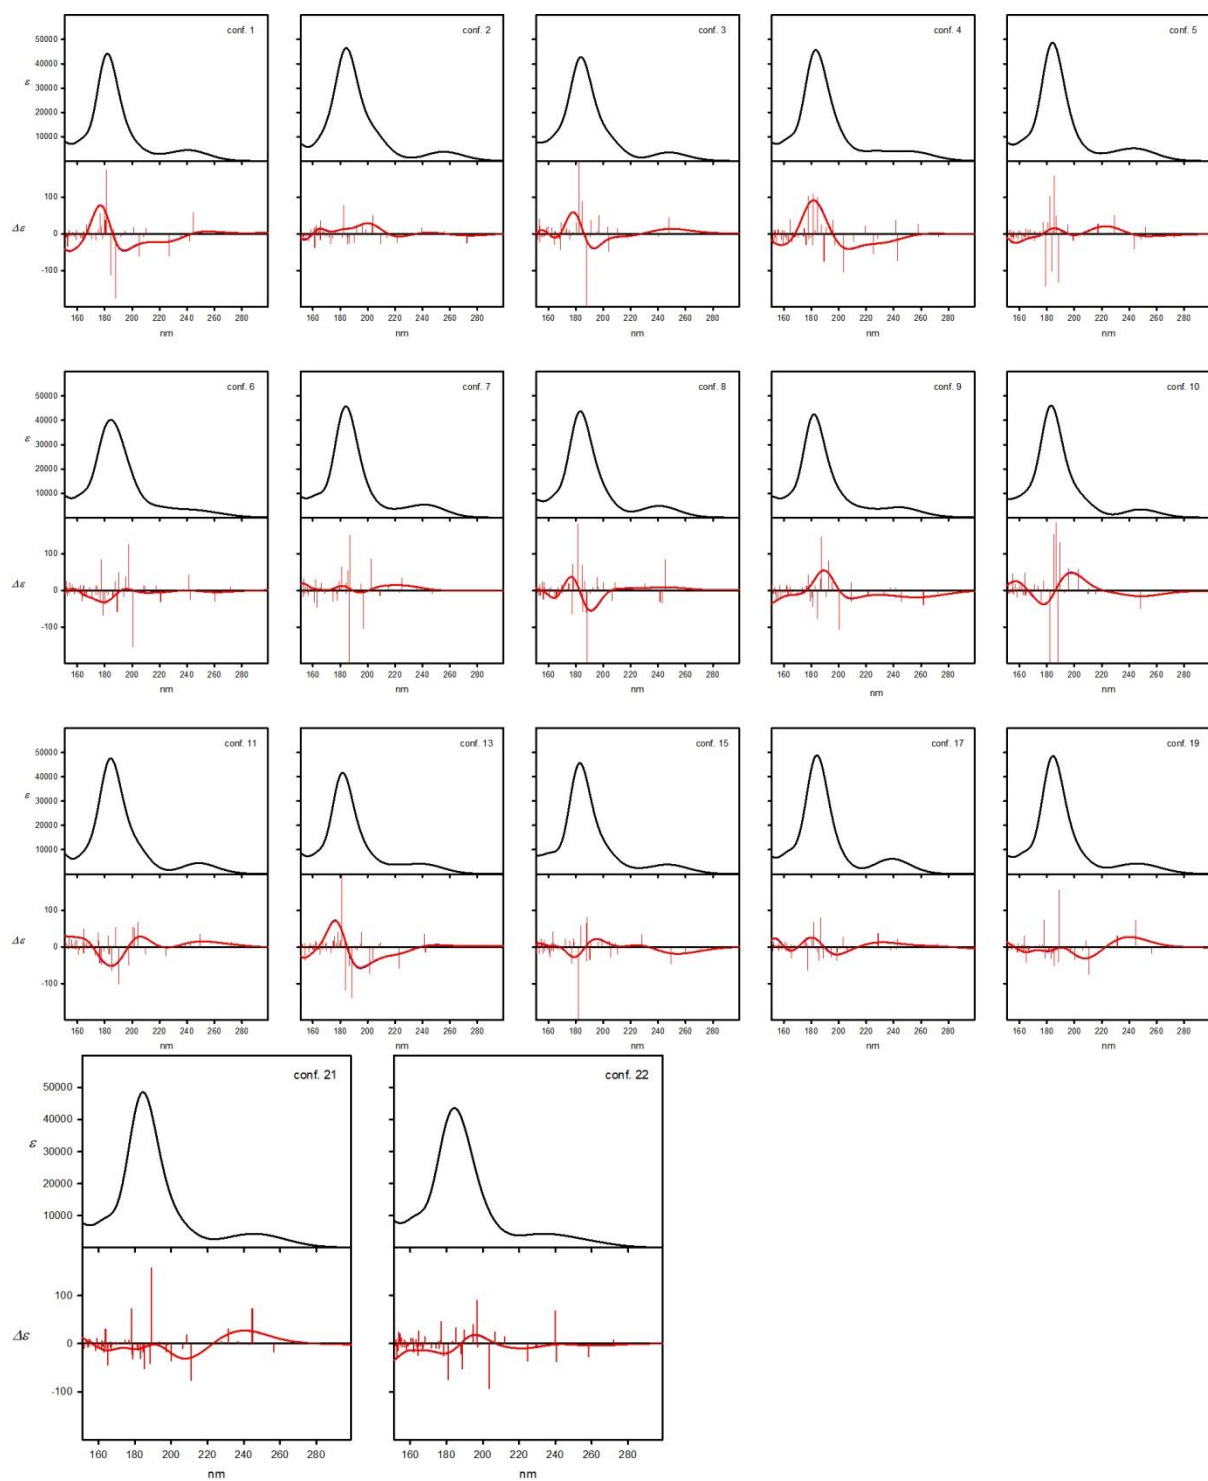

**Figure S5.** UV and ECD spectra of the low-energy conformers of compound **3g** calculated at TD-CAM-B3LYP/6-311++G(2d,2p) level for structures optimized at B3LYP/6-311++G(d,p) level. Wavelengths have not been corrected

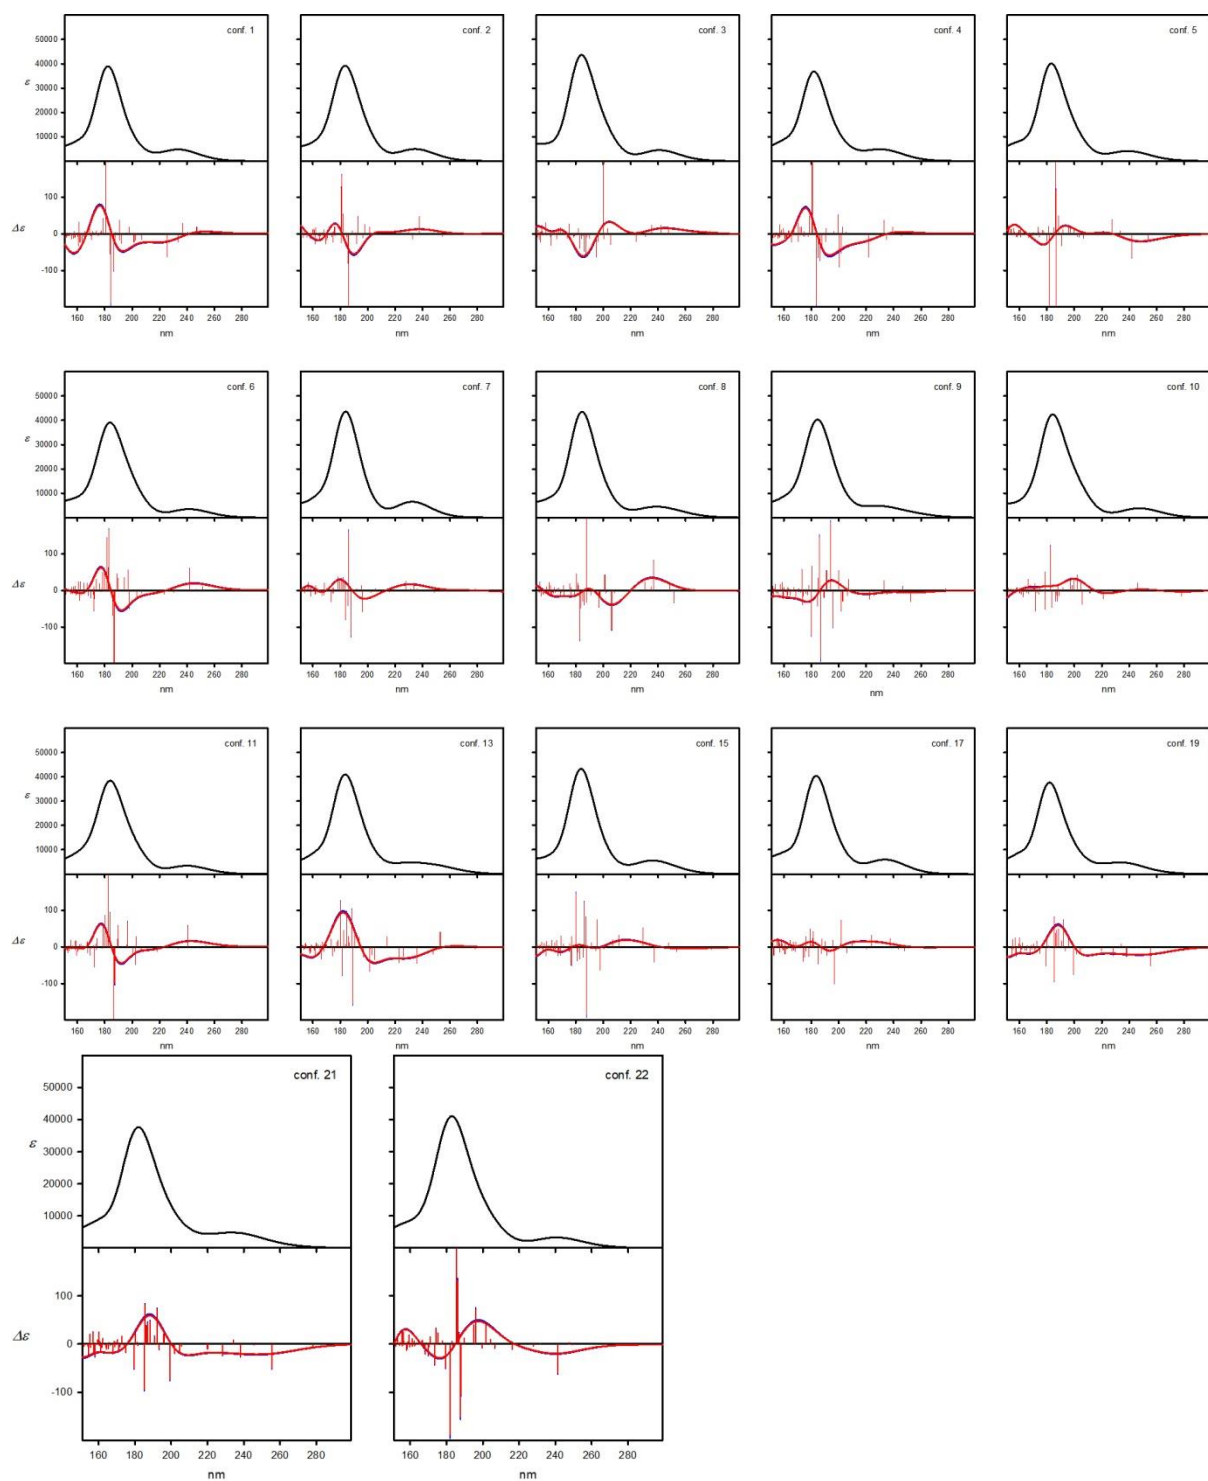

**Figure S6.** UV and ECD spectra of the low-energy conformers of compound **3g** calculated at TD-M06-2X/6-311++G(2d,2p) level for structures optimized at B3LYP/6-311++G(d,p) level. Wavelengths have not been corrected

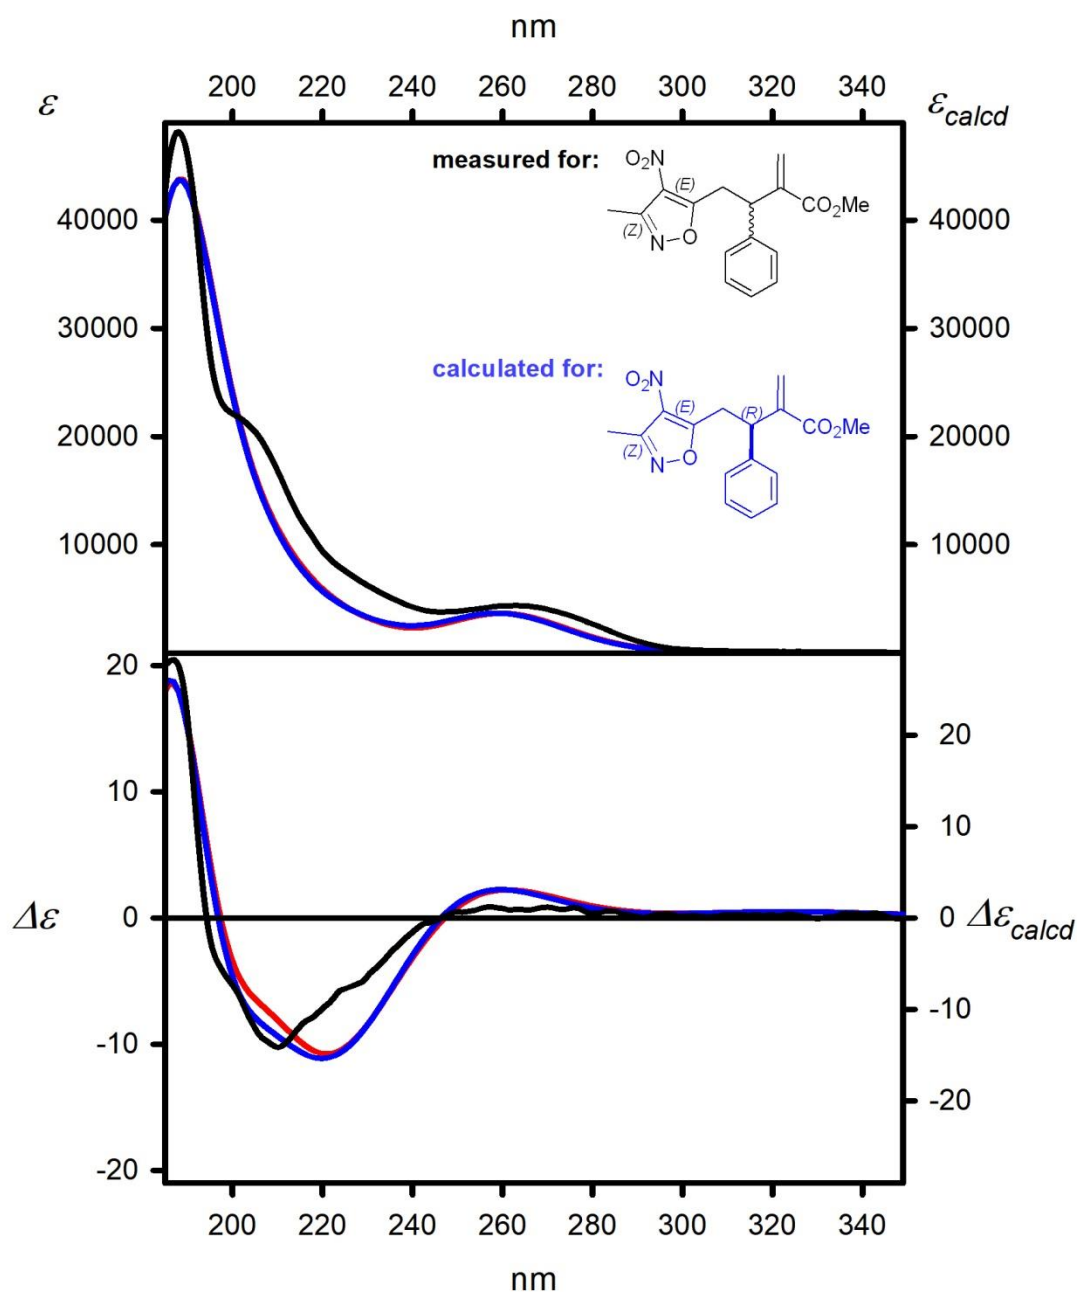

Experimental (cyclohexane, black lines)

Calculated at the  
 TD-CAM-B3LYP/6-311++G(2d,2p) level and:  
 $\Delta E$ -based Boltzmann averaged (red lines)  
 $\Delta\Delta G$ -based Boltzmann averaged (blue lines)

**Figure S7.** UV (upper panel) and ECD (lower panel) spectra of **3a**, measured in cyclohexane (solid black line) and calculated at TD-CAM-B3LYP/6-311++G(2d,2p) level and  $\Delta E$ -based Boltzmann averaged (solid red lines) and  $\Delta\Delta G$ -based Boltzmann averaged (solid blue lines). Wavelengths have been corrected to match experimental UV maximum

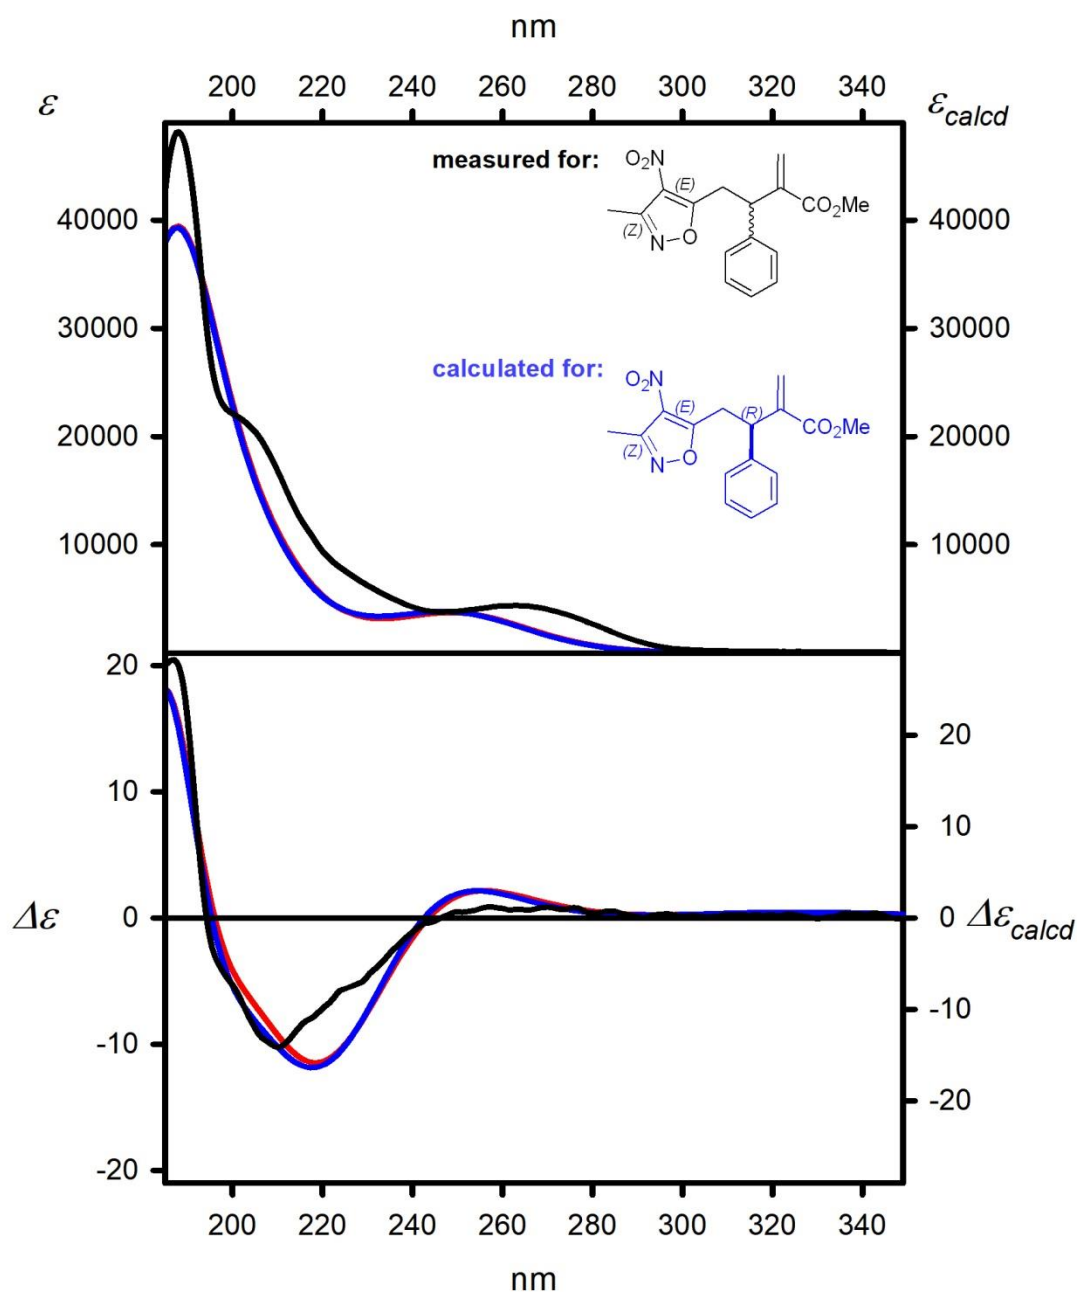

Experimental (cyclohexane, black lines)

Calculated at the  
 TD-M06-2X/6-311++G(2d,2p) level and:  
 $\Delta E$ -based Boltzmann averaged (red lines)  
 $\Delta\Delta G$ -based Boltzmann averaged (blue lines)

**Figure S8.** UV (upper panel) and ECD (lower panel) spectra of **3a**, measured in cyclohexane (solid black line) and calculated at TD-M06-2X/6-311++G(2d,2p) level and  $\Delta E$ -based Boltzmann averaged (solid red lines) and  $\Delta\Delta G$ -based Boltzmann averaged (solid blue lines). Wavelengths have been corrected to match experimental UV maximum



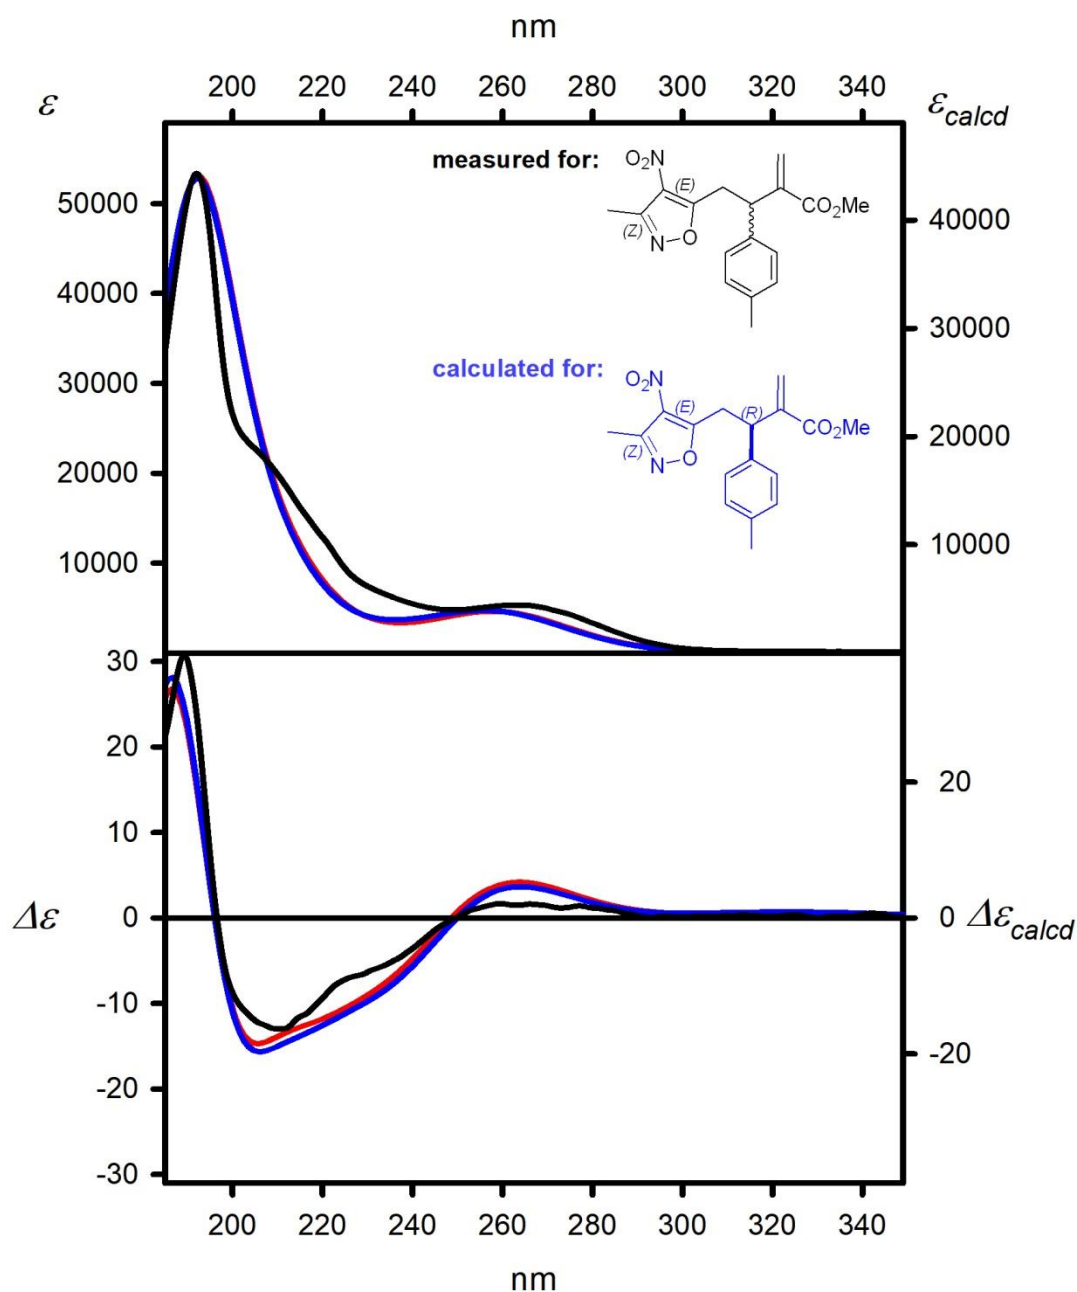

Experimental (cyclohexane, black lines)

Calculated at the  
 TD-CAM-B3LYP/6-311++G(2d,2p) level and:  
 $\Delta E$ -based Boltzmann averaged (red lines)  
 $\Delta G$ -based Boltzmann averaged (blue lines)

**Figure S9.** UV (upper panel) and ECD (lower panel) spectra of **3g**, measured in cyclohexane (solid black line) and calculated at TD-CAM-B3LYP/6-311++G(2d,2p) level and  $\Delta E$ -based Boltzmann averaged (solid red lines) and  $\Delta G$ -based Boltzmann averaged (solid blue lines). Wavelengths have been corrected to match experimental UV maximum

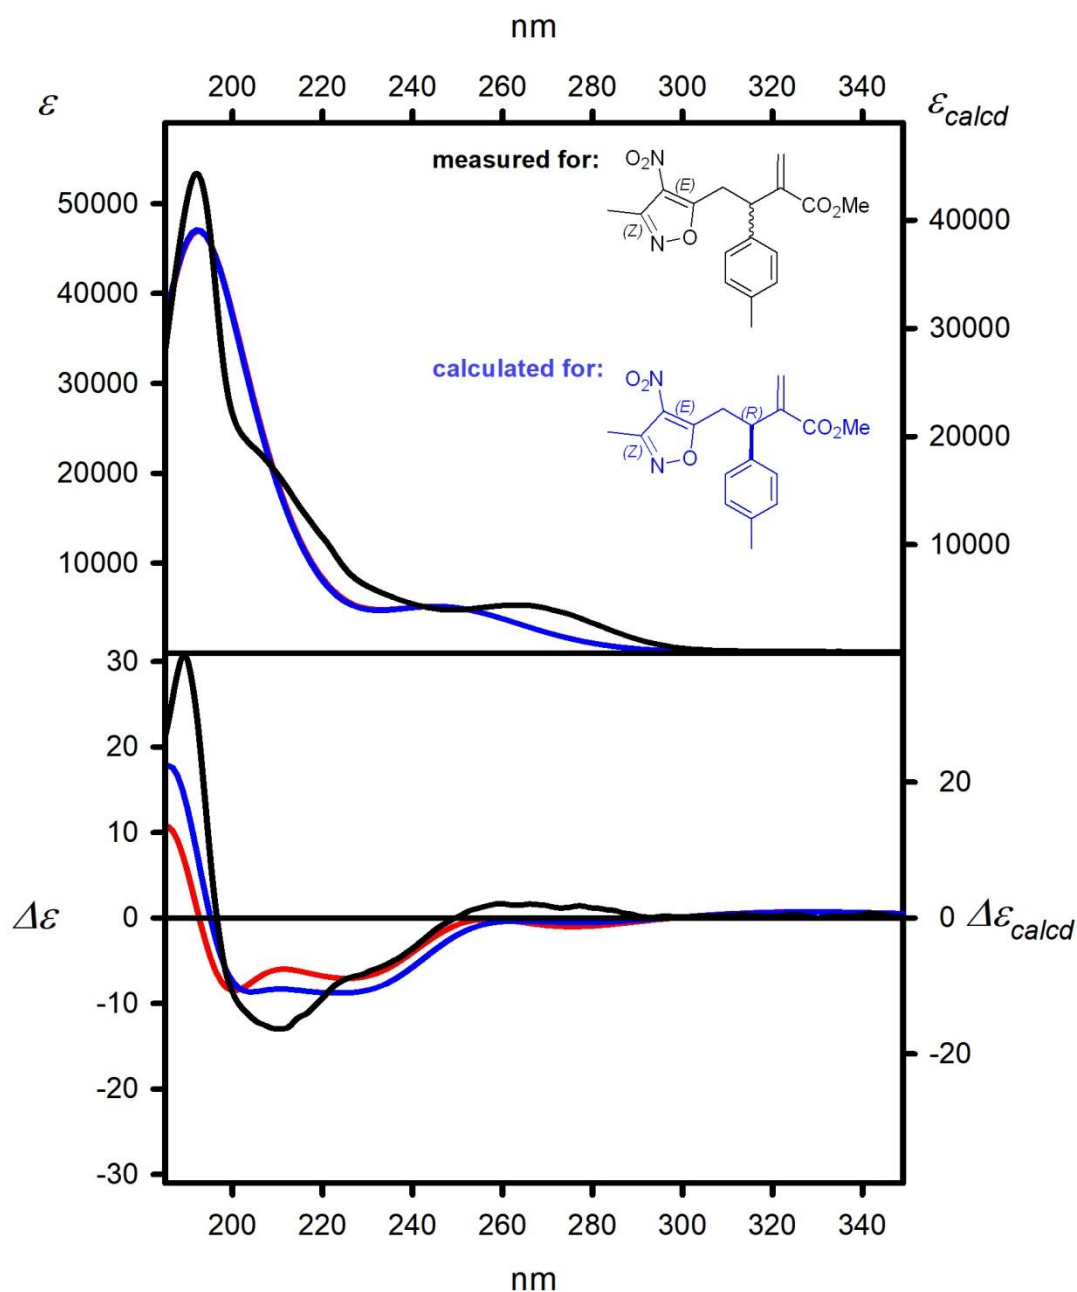

Experimental (cyclohexane, black lines)

Calculated at the  
 TD-M06-2X/6-311++G(2d,2p) level and:  
 $\Delta E$ -based Boltzmann averaged (red lines)  
 $\Delta\Delta G$ -based Boltzmann averaged (blue lines)

**Figure S10.** UV (upper panel) and ECD (lower panel) spectra of **3g**, measured in cyclohexane (solid black line) and calculated at TD-M06-2X/6-311++G(2d,2p) level and  $\Delta E$ -based Boltzmann averaged (solid red lines) and  $\Delta\Delta G$ -based Boltzmann averaged (solid blue lines). Wavelengths have been corrected to match experimental UV maximum

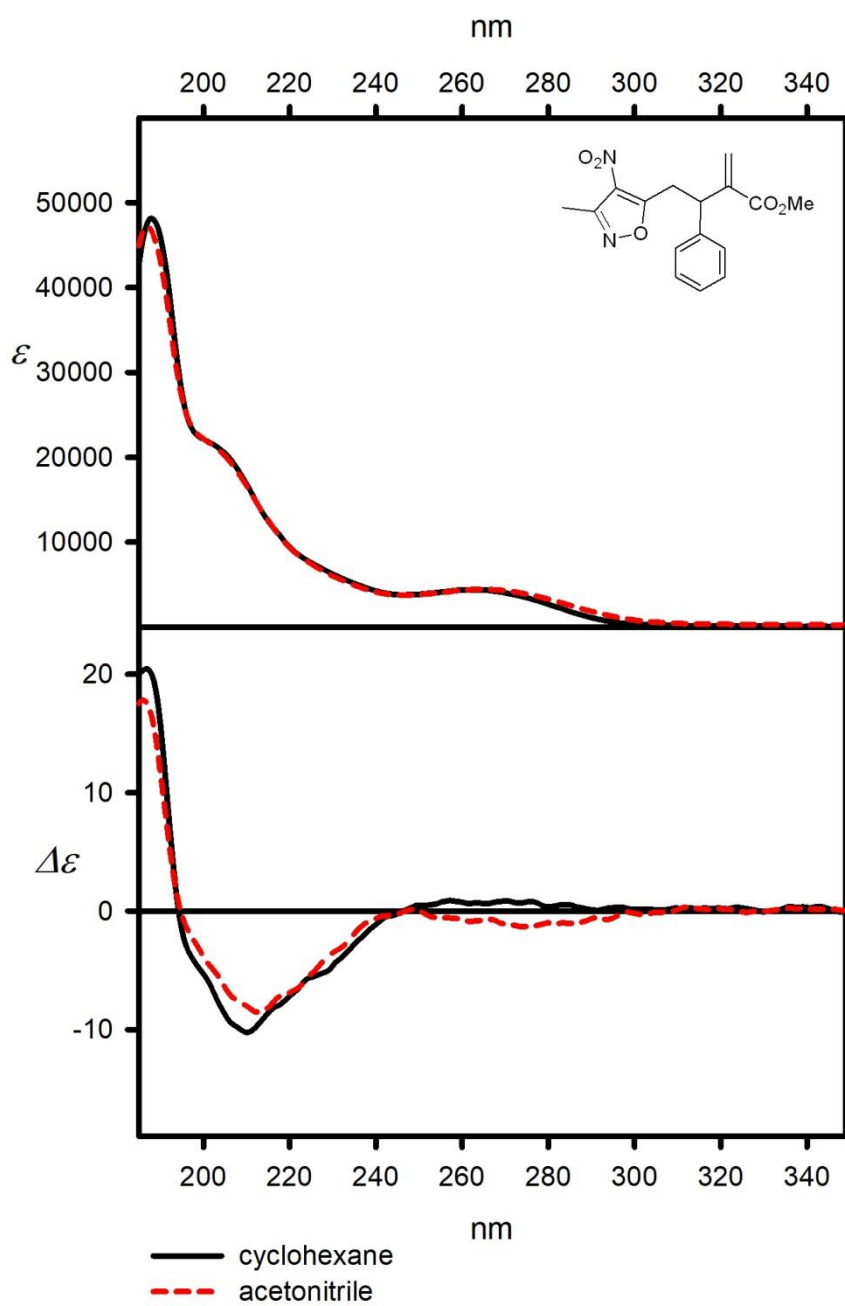

**Figure S11.** UV (upper panel) and ECD (lower panel) spectra of **3a**, measured in cyclohexane (solid black lines) and acetonitrile (red dashed lines) solution

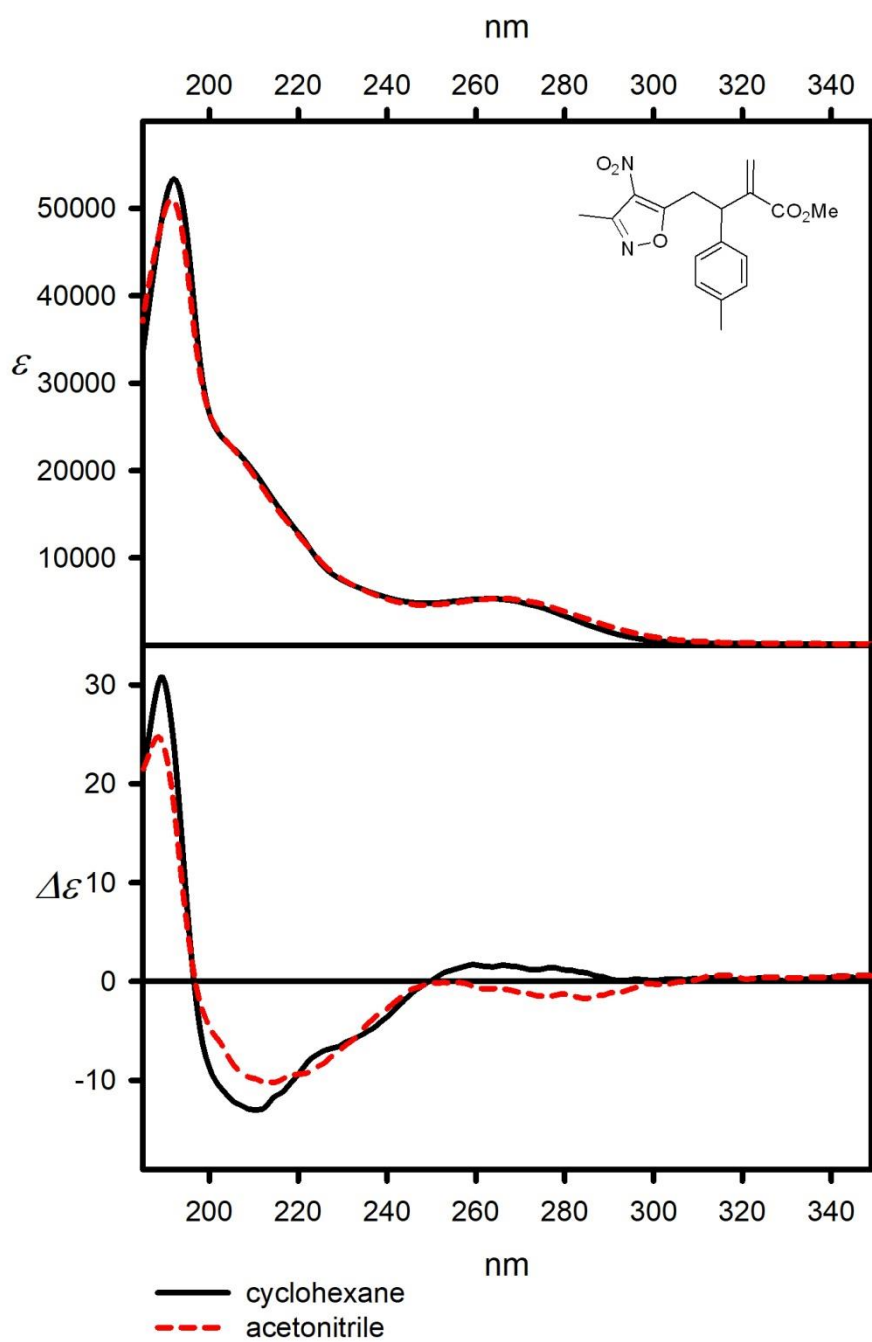

**Figure S12.** UV (upper panel) and ECD (lower panel) spectra of **3g**, measured in cyclohexane (solid black lines) and acetonitrile (red dashed lines) solution

### Cartesian coordinates for all calculated structures

3a

Conf. no.<sup>[a]</sup>

---

|   |   |             |             |             |
|---|---|-------------|-------------|-------------|
| 1 | N | -2.80040000 | -1.08920000 | 2.08530000  |
|   | C | -3.51330000 | -0.65420000 | 1.08480000  |
|   | C | -2.73000000 | -0.67880000 | -0.11500000 |
|   | C | -1.49470000 | -1.15170000 | 0.24890000  |
|   | O | -1.52330000 | -1.40110000 | 1.55510000  |
|   | C | -4.92600000 | -0.23430000 | 1.30740000  |
|   | C | -0.22030000 | -1.42550000 | -0.46810000 |
|   | C | 0.97900000  | -0.64500000 | 0.12360000  |
|   | C | 0.75550000  | 0.86730000  | 0.07550000  |
|   | C | 0.64470000  | 1.54320000  | -1.14150000 |
|   | C | 0.41510000  | 2.91390000  | -1.17450000 |
|   | C | 0.29860000  | 3.63180000  | 0.01220000  |
|   | C | 0.41350000  | 2.96940000  | 1.22910000  |
|   | C | 0.64070000  | 1.59670000  | 1.25890000  |
|   | C | 2.29150000  | -1.02950000 | -0.53670000 |
|   | C | 2.41890000  | -1.62250000 | -1.72340000 |
|   | C | 3.50210000  | -0.71110000 | 0.28840000  |
|   | O | 4.65450000  | -0.78560000 | -0.40360000 |
|   | O | 3.45300000  | -0.42910000 | 1.46320000  |
|   | C | 5.84950000  | -0.52790000 | 0.35580000  |
|   | N | -3.15850000 | -0.28680000 | -1.42330000 |
|   | O | -4.27860000 | 0.20880000  | -1.52070000 |
|   | O | -2.39600000 | -0.46970000 | -2.37100000 |
|   | H | -5.18270000 | -0.38210000 | 2.35340000  |
|   | H | -5.60240000 | -0.81180000 | 0.67940000  |
|   | H | -5.05940000 | 0.81270000  | 1.04120000  |
|   | H | -0.01690000 | -2.49680000 | -0.39380000 |
|   | H | -0.37740000 | -1.18850000 | -1.51460000 |
|   | H | 1.07110000  | -0.91660000 | 1.17370000  |
|   | H | 0.74000000  | 1.00090000  | -2.07300000 |
|   | H | 0.32810000  | 3.42020000  | -2.12610000 |
|   | H | 0.12190000  | 4.69840000  | -0.01290000 |
|   | H | 0.32900000  | 3.51850000  | 2.15700000  |
|   | H | 0.73970000  | 1.08840000  | 2.20820000  |
|   | H | 3.39310000  | -1.85180000 | -2.12590000 |
|   | H | 1.56340000  | -1.89620000 | -2.32360000 |
|   | H | 5.82170000  | 0.47490000  | 0.77590000  |
|   | H | 6.66680000  | -0.62480000 | -0.35110000 |
|   | H | 5.95040000  | -1.25120000 | 1.16210000  |
| 2 | N | 3.24760000  | -0.45570000 | -1.96490000 |
|   | C | 3.65590000  | -0.47820000 | -0.72750000 |
|   | C | 2.55720000  | -0.78370000 | 0.14050000  |
|   | C | 1.46180000  | -0.93610000 | -0.67170000 |
|   | O | 1.86100000  | -0.74450000 | -1.92790000 |
|   | C | 5.08870000  | -0.21020000 | -0.41520000 |

---

|   |             |             |             |
|---|-------------|-------------|-------------|
| C | 0.02240000  | -1.25390000 | -0.46740000 |
| C | -0.90860000 | -0.14850000 | -1.04030000 |
| C | -0.75740000 | 1.20680000  | -0.34880000 |
| C | -0.62960000 | 1.34550000  | 1.03530000  |
| C | -0.50420000 | 2.60660000  | 1.61060000  |
| C | -0.50570000 | 3.74810000  | 0.81660000  |
| C | -0.63110000 | 3.62180000  | -0.56280000 |
| C | -0.75450000 | 2.36140000  | -1.13590000 |
| C | -2.36140000 | -0.60340000 | -1.12010000 |
| C | -2.99240000 | -0.69940000 | -2.29120000 |
| C | -3.06670000 | -0.97110000 | 0.14670000  |
| O | -4.40350000 | -1.04900000 | 0.00360000  |
| O | -2.50540000 | -1.19600000 | 1.19500000  |
| C | -5.13050000 | -1.44690000 | 1.18060000  |
| N | 2.60590000  | -0.90440000 | 1.56630000  |
| O | 3.68250000  | -0.66750000 | 2.11110000  |
| O | 1.58440000  | -1.23720000 | 2.16220000  |
| H | 5.63020000  | -0.03650000 | -1.34180000 |
| H | 5.53010000  | -1.05230000 | 0.11500000  |
| H | 5.18310000  | 0.65920000  | 0.23300000  |
| H | -0.18770000 | -2.18620000 | -0.99760000 |
| H | -0.16160000 | -1.42730000 | 0.58420000  |
| H | -0.60600000 | 0.00300000  | -2.07580000 |
| H | -0.63570000 | 0.47390000  | 1.67160000  |
| H | -0.40410000 | 2.69290000  | 2.68410000  |
| H | -0.40580000 | 4.72590000  | 1.26760000  |
| H | -0.62640000 | 4.50080000  | -1.19300000 |
| H | -0.84330000 | 2.27320000  | -2.21150000 |
| H | -4.02440000 | -1.00790000 | -2.35240000 |
| H | -2.48390000 | -0.47040000 | -3.21810000 |
| H | -4.81290000 | -2.43470000 | 1.50750000  |
| H | -6.17400000 | -1.45770000 | 0.88400000  |
| H | -4.96720000 | -0.73380000 | 1.98520000  |

3

|   |             |             |             |
|---|-------------|-------------|-------------|
| N | 3.21090000  | 0.25510000  | -1.41800000 |
| C | 3.38530000  | -0.69780000 | -0.54460000 |
| C | 2.12600000  | -1.29030000 | -0.21630000 |
| C | 1.18520000  | -0.61620000 | -0.95110000 |
| O | 1.81670000  | 0.30030000  | -1.67950000 |
| C | 4.75400000  | -1.01000000 | -0.04490000 |
| C | -0.29060000 | -0.70960000 | -1.09460000 |
| C | -1.09630000 | 0.06520000  | -0.00340000 |
| C | -2.56190000 | -0.34180000 | -0.00220000 |
| C | -3.27240000 | -0.63900000 | -1.16660000 |
| C | -4.62000000 | -0.98690000 | -1.11260000 |
| C | -5.28000000 | -1.04460000 | 0.10870000  |
| C | -4.58190000 | -0.75530000 | 1.27730000  |
| C | -3.23770000 | -0.40910000 | 1.21900000  |
| C | -0.89830000 | 1.57460000  | -0.12170000 |
| C | -1.73930000 | 2.39770000  | -0.74700000 |
| C | 0.31890000  | 2.11210000  | 0.56430000  |
| O | 0.55940000  | 3.40700000  | 0.29800000  |

---

|   |   |             |             |             |
|---|---|-------------|-------------|-------------|
|   | O | 1.01630000  | 1.44950000  | 1.30110000  |
|   | C | 1.71760000  | 3.96870000  | 0.94280000  |
|   | N | 1.88020000  | -2.34860000 | 0.70760000  |
|   | O | 2.85430000  | -2.87320000 | 1.24350000  |
|   | O | 0.71090000  | -2.67610000 | 0.91190000  |
|   | H | 5.47030000  | -0.34150000 | -0.51610000 |
|   | H | 5.01640000  | -2.04330000 | -0.26530000 |
|   | H | 4.79940000  | -0.89280000 | 1.03660000  |
|   | H | -0.54750000 | -0.33660000 | -2.08520000 |
|   | H | -0.56800000 | -1.75890000 | -1.02970000 |
|   | H | -0.67800000 | -0.23220000 | 0.95620000  |
|   | H | -2.78220000 | -0.60770000 | -2.13000000 |
|   | H | -5.15000000 | -1.21620000 | -2.02710000 |
|   | H | -6.32490000 | -1.31950000 | 0.15120000  |
|   | H | -5.08140000 | -0.80680000 | 2.23510000  |
|   | H | -2.70080000 | -0.19410000 | 2.13390000  |
|   | H | -1.53980000 | 3.45630000  | -0.80480000 |
|   | H | -2.64980000 | 2.03320000  | -1.20040000 |
|   | H | 1.75510000  | 5.00260000  | 0.61630000  |
|   | H | 2.61440000  | 3.43600000  | 0.63490000  |
|   | H | 1.61580000  | 3.91010000  | 2.02420000  |
| 4 | N | -2.63130000 | -0.98740000 | 2.17740000  |
|   | C | -3.38750000 | -0.54840000 | 1.21090000  |
|   | C | -2.67970000 | -0.62760000 | -0.03250000 |
|   | C | -1.44230000 | -1.13730000 | 0.26740000  |
|   | O | -1.40020000 | -1.35740000 | 1.57910000  |
|   | C | -4.76870000 | -0.07260000 | 1.50690000  |
|   | C | -0.22320000 | -1.47110000 | -0.51680000 |
|   | C | 1.03880000  | -0.72350000 | -0.01250000 |
|   | C | 0.85310000  | 0.79260000  | -0.08920000 |
|   | C | 0.84660000  | 1.45850000  | -1.31620000 |
|   | C | 0.63540000  | 2.83140000  | -1.37810000 |
|   | C | 0.43050000  | 3.56130000  | -0.21130000 |
|   | C | 0.43910000  | 2.90870000  | 1.01650000  |
|   | C | 0.64980000  | 1.53450000  | 1.07500000  |
|   | C | 2.29210000  | -1.17910000 | -0.74070000 |
|   | C | 2.31750000  | -1.85700000 | -1.88750000 |
|   | C | 3.62730000  | -0.84290000 | -0.13580000 |
|   | O | 3.51210000  | -0.40580000 | 1.13380000  |
|   | O | 4.68850000  | -0.96160000 | -0.69920000 |
|   | C | 4.74740000  | -0.05730000 | 1.78500000  |
|   | N | -3.17250000 | -0.24750000 | -1.32220000 |
|   | O | -4.27430000 | 0.29460000  | -1.36240000 |
|   | O | -2.47920000 | -0.48620000 | -2.30920000 |
|   | H | -4.96860000 | -0.19200000 | 2.56880000  |
|   | H | -5.50100000 | -0.63610000 | 0.93100000  |
|   | H | -4.88000000 | 0.97350000  | 1.22760000  |
|   | H | -0.05520000 | -2.54780000 | -0.43250000 |
|   | H | -0.43010000 | -1.24550000 | -1.55730000 |
|   | H | 1.16890000  | -0.97470000 | 1.03880000  |
|   | H | 1.01290000  | 0.90570000  | -2.23110000 |

---

---

|   |   |             |             |             |
|---|---|-------------|-------------|-------------|
|   | H | 0.63250000  | 3.33020000  | -2.33760000 |
|   | H | 0.26830000  | 4.62930000  | -0.25940000 |
|   | H | 0.28360000  | 3.46680000  | 1.92990000  |
|   | H | 0.65880000  | 1.03360000  | 2.03400000  |
|   | H | 3.26500000  | -2.12060000 | -2.33380000 |
|   | H | 1.41990000  | -2.16060000 | -2.40460000 |
|   | H | 4.46700000  | 0.27550000  | 2.77870000  |
|   | H | 5.24880000  | 0.73880000  | 1.23940000  |
|   | H | 5.40370000  | -0.92290000 | 1.83900000  |
| 5 | N | 3.09390000  | 0.87200000  | 1.78370000  |
|   | C | 3.64220000  | 0.17150000  | 0.83050000  |
|   | C | 2.65910000  | -0.67930000 | 0.23150000  |
|   | C | 1.48240000  | -0.43270000 | 0.89810000  |
|   | O | 1.73090000  | 0.48720000  | 1.82420000  |
|   | C | 5.09140000  | 0.33720000  | 0.52380000  |
|   | C | 0.09320000  | -0.95440000 | 0.80800000  |
|   | C | -0.67460000 | -0.44510000 | -0.44690000 |
|   | C | -0.80970000 | 1.07430000  | -0.53310000 |
|   | C | -1.15460000 | 1.87670000  | 0.55690000  |
|   | C | -1.26880000 | 3.25590000  | 0.41320000  |
|   | C | -1.04330000 | 3.85790000  | -0.81980000 |
|   | C | -0.69960000 | 3.06990000  | -1.91290000 |
|   | C | -0.58390000 | 1.69240000  | -1.76620000 |
|   | C | -2.00910000 | -1.16260000 | -0.61910000 |
|   | C | -2.23750000 | -1.95060000 | -1.67060000 |
|   | C | -3.05420000 | -0.99790000 | 0.43680000  |
|   | O | -4.28470000 | -1.35240000 | 0.02220000  |
|   | O | -2.82990000 | -0.60390000 | 1.56020000  |
|   | C | -5.32450000 | -1.26220000 | 1.01320000  |
|   | N | 2.85760000  | -1.61650000 | -0.82460000 |
|   | O | 3.98940000  | -1.71620000 | -1.29320000 |
|   | O | 1.88670000  | -2.27380000 | -1.20560000 |
|   | H | 5.51600000  | 1.08140000  | 1.19280000  |
|   | H | 5.23140000  | 0.65170000  | -0.50910000 |
|   | H | 5.61960000  | -0.60720000 | 0.64380000  |
|   | H | 0.14230000  | -2.04100000 | 0.74880000  |
|   | H | -0.43530000 | -0.68630000 | 1.71760000  |
|   | H | -0.08050000 | -0.75170000 | -1.30520000 |
|   | H | -1.34300000 | 1.42950000  | 1.52090000  |
|   | H | -1.53200000 | 3.86030000  | 1.27060000  |
|   | H | -1.12980000 | 4.93050000  | -0.92680000 |
|   | H | -0.51670000 | 3.52520000  | -2.87680000 |
|   | H | -0.31190000 | 1.08740000  | -2.62220000 |
|   | H | -3.18380000 | -2.45130000 | -1.80520000 |
|   | H | -1.47280000 | -2.11670000 | -2.41720000 |
|   | H | -6.23200000 | -1.57390000 | 0.50690000  |
|   | H | -5.41690000 | -0.23990000 | 1.37240000  |
|   | H | -5.10750000 | -1.91910000 | 1.85270000  |
| 6 | N | -2.42190000 | -1.49900000 | 1.99710000  |
|   | C | -3.15790000 | -1.37100000 | 0.92970000  |

---



---

|   |             |             |             |             |
|---|-------------|-------------|-------------|-------------|
| C | -2.32210000 | -1.12960000 | -0.20930000 |             |
| C | -1.03190000 | -1.12130000 | 0.26240000  |             |
| O | -1.07840000 | -1.34230000 | 1.57250000  |             |
| C | -4.64060000 | -1.48450000 | 1.03380000  |             |
| C | 0.31340000  | -0.94490000 | -0.34560000 |             |
| C | 1.13470000  | 0.20310000  | 0.31330000  |             |
| C | 0.43100000  | 1.54960000  | 0.26990000  |             |
| C | -0.26050000 | 2.00020000  | -0.85760000 |             |
| C | -0.87520000 | 3.24920000  | -0.86450000 |             |
| C | -0.80980000 | 4.06930000  | 0.25640000  |             |
| C | -0.12820000 | 3.63020000  | 1.38690000  |             |
| C | 0.48410000  | 2.38200000  | 1.39040000  |             |
| C | 2.53790000  | 0.23150000  | -0.28540000 |             |
| C | 3.00830000  | 1.19490000  | -1.07710000 |             |
| C | 3.41050000  | -0.91850000 | 0.11250000  |             |
| O | 4.61940000  | -0.90910000 | -0.47930000 |             |
| O | 3.06960000  | -1.77580000 | 0.89750000  |             |
| C | 5.49950000  | -1.98650000 | -0.11090000 |             |
| N | -2.75480000 | -0.92980000 | -1.55660000 |             |
| O | -3.96580000 | -0.94580000 | -1.76640000 |             |
| O | -1.90400000 | -0.75370000 | -2.42900000 |             |
| H | -4.91190000 | -1.68320000 | 2.06770000  |             |
| H | -5.01010000 | -2.28660000 | 0.39720000  |             |
| H | -5.11950000 | -0.56580000 | 0.69940000  |             |
| H | 0.86420000  | -1.87530000 | -0.20120000 |             |
| H | 0.19280000  | -0.78600000 | -1.41110000 |             |
| H | 1.25580000  | -0.07210000 | 1.36100000  |             |
| H | -0.33220000 | 1.37820000  | -1.73920000 |             |
| H | -1.40820000 | 3.57680000  | -1.74670000 |             |
| H | -1.29050000 | 5.03790000  | 0.25170000  |             |
| H | -0.07810000 | 4.25500000  | 2.26820000  |             |
| H | 1.00560000  | 2.04550000  | 2.27740000  |             |
| H | 4.01490000  | 1.15130000  | -1.46250000 |             |
| H | 2.40310000  | 2.04750000  | -1.34690000 |             |
| H | 6.41170000  | -1.81820000 | -0.67360000 |             |
| H | 5.05710000  | -2.94460000 | -0.37440000 |             |
| H | 5.69790000  | -1.96600000 | 0.95840000  |             |
| 7 | N           | 3.06920000  | -1.35490000 | 1.71740000  |
|   | C           | 3.69340000  | -0.81750000 | 0.70700000  |
|   | C           | 2.76380000  | -0.54680000 | -0.34790000 |
|   | C           | 1.53580000  | -0.95250000 | 0.11090000  |
|   | O           | 1.70480000  | -1.43520000 | 1.34020000  |
|   | C           | 5.16490000  | -0.59010000 | 0.77780000  |
|   | C           | 0.16030000  | -0.96710000 | -0.45940000 |
|   | C           | -0.94380000 | -0.65870000 | 0.58270000  |
|   | C           | -2.34570000 | -0.96870000 | 0.05710000  |
|   | C           | -2.72770000 | -0.76760000 | -1.27060000 |
|   | C           | -4.02060000 | -1.06860000 | -1.68910000 |
|   | C           | -4.95410000 | -1.57090000 | -0.78970000 |
|   | C           | -4.58570000 | -1.77370000 | 0.53620000  |
|   | C           | -3.29310000 | -1.47530000 | 0.95070000  |

---

---

|   |   |             |             |             |
|---|---|-------------|-------------|-------------|
|   | C | -0.84810000 | 0.74600000  | 1.17150000  |
|   | C | -0.59700000 | 0.94290000  | 2.46640000  |
|   | C | -1.02420000 | 1.91100000  | 0.25010000  |
|   | O | -1.20970000 | 3.07660000  | 0.89870000  |
|   | O | -0.99130000 | 1.83120000  | -0.95730000 |
|   | C | -1.34170000 | 4.23820000  | 0.05880000  |
|   | N | 3.06150000  | 0.01950000  | -1.62810000 |
|   | O | 4.19010000  | 0.48170000  | -1.78810000 |
|   | O | 2.18470000  | 0.00610000  | -2.48820000 |
|   | H | 5.54000000  | -0.96220000 | 1.72810000  |
|   | H | 5.39330000  | 0.46980000  | 0.68250000  |
|   | H | 5.67220000  | -1.09990000 | -0.03970000 |
|   | H | 0.13160000  | -0.27620000 | -1.29360000 |
|   | H | -0.01960000 | -1.96630000 | -0.86690000 |
|   | H | -0.78390000 | -1.33290000 | 1.42280000  |
|   | H | -2.02620000 | -0.35890000 | -1.98180000 |
|   | H | -4.29670000 | -0.90630000 | -2.72220000 |
|   | H | -5.95740000 | -1.80430000 | -1.11870000 |
|   | H | -5.30010000 | -2.16860000 | 1.24570000  |
|   | H | -3.01470000 | -1.64050000 | 1.98410000  |
|   | H | -0.54440000 | 1.93570000  | 2.88560000  |
|   | H | -0.42980000 | 0.10860000  | 3.13380000  |
|   | H | -1.47920000 | 5.07150000  | 0.73980000  |
|   | H | -2.20160000 | 4.13380000  | -0.59880000 |
|   | H | -0.44580000 | 4.37600000  | -0.54250000 |
| 8 | N | -3.28480000 | 1.49820000  | 0.81960000  |
|   | C | -3.75120000 | 0.39610000  | 0.30200000  |
|   | C | -2.71320000 | -0.58820000 | 0.24950000  |
|   | C | -1.59410000 | 0.00620000  | 0.78110000  |
|   | O | -1.92330000 | 1.24810000  | 1.12380000  |
|   | C | -5.17680000 | 0.31890000  | -0.12620000 |
|   | C | -0.19500000 | -0.42710000 | 1.03430000  |
|   | C | 0.68440000  | -0.43140000 | -0.25080000 |
|   | C | 2.05130000  | -1.06860000 | -0.00280000 |
|   | C | 2.52710000  | -2.00190000 | -0.92730000 |
|   | C | 3.76270000  | -2.61630000 | -0.75790000 |
|   | C | 4.54640000  | -2.30820000 | 0.34860000  |
|   | C | 4.08250000  | -1.38390000 | 1.27810000  |
|   | C | 2.84690000  | -0.76780000 | 1.10540000  |
|   | C | 0.77630000  | 0.92410000  | -0.94270000 |
|   | C | 0.35240000  | 1.08440000  | -2.19740000 |
|   | C | 1.33710000  | 2.08450000  | -0.18270000 |
|   | O | 1.56020000  | 3.16450000  | -0.95410000 |
|   | O | 1.56210000  | 2.07370000  | 1.00710000  |
|   | C | 2.05810000  | 4.32640000  | -0.26610000 |
|   | N | -2.81370000 | -1.92390000 | -0.24260000 |
|   | O | -3.91690000 | -2.30730000 | -0.62630000 |
|   | O | -1.79250000 | -2.61250000 | -0.25720000 |
|   | H | -5.66000000 | 1.27430000  | 0.06260000  |
|   | H | -5.69710000 | -0.46840000 | 0.41650000  |
|   | H | -5.24790000 | 0.07600000  | -1.18520000 |

---

---

|   |   |             |             |             |
|---|---|-------------|-------------|-------------|
|   | H | 0.22890000  | 0.23530000  | 1.78290000  |
|   | H | -0.21440000 | -1.44400000 | 1.42120000  |
|   | H | 0.17670000  | -1.08470000 | -0.95790000 |
|   | H | 1.91990000  | -2.25740000 | -1.78640000 |
|   | H | 4.10710000  | -3.33870000 | -1.48540000 |
|   | H | 5.50650000  | -2.78620000 | 0.48700000  |
|   | H | 4.68360000  | -1.13780000 | 2.14310000  |
|   | H | 2.51440000  | -0.03910000 | 1.82860000  |
|   | H | 0.42330000  | 2.03550000  | -2.70150000 |
|   | H | -0.07570000 | 0.25790000  | -2.74840000 |
|   | H | 2.17110000  | 5.08720000  | -1.03130000 |
|   | H | 3.01510000  | 4.10770000  | 0.20220000  |
|   | H | 1.35080000  | 4.64820000  | 0.49500000  |
| 9 | N | 3.58080000  | 0.61330000  | -1.65730000 |
|   | C | 3.85710000  | 0.12620000  | -0.47960000 |
|   | C | 2.72200000  | -0.58280000 | 0.02840000  |
|   | C | 1.74550000  | -0.47970000 | -0.93150000 |
|   | O | 2.24620000  | 0.22720000  | -1.94090000 |
|   | C | 5.20160000  | 0.35130000  | 0.12300000  |
|   | C | 0.34700000  | -0.97260000 | -1.05850000 |
|   | C | -0.68410000 | -0.21620000 | -0.17500000 |
|   | C | -2.00980000 | -0.97720000 | -0.18500000 |
|   | C | -2.91000000 | -0.87000000 | -1.24590000 |
|   | C | -4.08760000 | -1.61100000 | -1.25570000 |
|   | C | -4.38360000 | -2.46720000 | -0.20050000 |
|   | C | -3.49490000 | -2.57680000 | 0.86420000  |
|   | C | -2.31770000 | -1.83680000 | 0.87070000  |
|   | C | -0.86980000 | 1.24850000  | -0.52430000 |
|   | C | -0.59320000 | 1.81490000  | -1.69830000 |
|   | C | -1.40120000 | 2.07460000  | 0.60900000  |
|   | O | -1.82840000 | 3.29360000  | 0.22730000  |
|   | O | -1.43370000 | 1.69280000  | 1.75580000  |
|   | C | -2.31290000 | 4.13790000  | 1.28720000  |
|   | N | 2.62860000  | -1.29100000 | 1.26530000  |
|   | O | 3.60920000  | -1.27200000 | 2.00530000  |
|   | O | 1.57760000  | -1.88200000 | 1.51290000  |
|   | H | 5.80750000  | 0.93970000  | -0.56150000 |
|   | H | 5.69450000  | -0.59800000 | 0.32520000  |
|   | H | 5.11200000  | 0.87270000  | 1.07450000  |
|   | H | 0.06470000  | -0.93430000 | -2.10970000 |
|   | H | 0.32950000  | -2.01570000 | -0.74920000 |
|   | H | -0.31790000 | -0.25010000 | 0.84860000  |
|   | H | -2.70090000 | -0.19550000 | -2.06560000 |
|   | H | -4.77510000 | -1.51430000 | -2.08520000 |
|   | H | -5.30090000 | -3.03990000 | -0.20540000 |
|   | H | -3.71890000 | -3.23450000 | 1.69300000  |
|   | H | -1.63320000 | -1.92150000 | 1.70420000  |
|   | H | -0.77210000 | 2.86640000  | -1.86020000 |
|   | H | -0.17090000 | 1.25870000  | -2.52170000 |
|   | H | -2.61850000 | 5.06020000  | 0.80430000  |
|   | H | -1.52490000 | 4.32700000  | 2.01290000  |

---

---

|    |   |             |             |             |
|----|---|-------------|-------------|-------------|
|    | H | -3.15610000 | 3.66890000  | 1.78920000  |
| 10 | N | 2.38720000  | -2.28390000 | 1.47760000  |
|    | C | 3.12400000  | -1.65150000 | 0.60850000  |
|    | C | 2.28810000  | -1.02100000 | -0.36780000 |
|    | C | 0.99710000  | -1.31740000 | -0.00950000 |
|    | O | 1.04250000  | -2.07830000 | 1.07880000  |
|    | C | 4.60830000  | -1.66640000 | 0.74280000  |
|    | C | -0.35260000 | -1.05470000 | -0.57540000 |
|    | C | -1.24250000 | -0.06480000 | 0.25320000  |
|    | C | -2.71990000 | -0.39270000 | 0.09850000  |
|    | C | -3.27790000 | -0.80190000 | -1.11470000 |
|    | C | -4.63880000 | -1.07570000 | -1.21910000 |
|    | C | -5.46630000 | -0.94540000 | -0.10970000 |
|    | C | -4.92240000 | -0.54060000 | 1.10530000  |
|    | C | -3.56290000 | -0.26800000 | 1.20500000  |
|    | C | -0.93280000 | 1.39640000  | -0.06770000 |
|    | C | -1.68740000 | 2.17630000  | -0.84110000 |
|    | C | 0.29680000  | 1.94120000  | 0.58420000  |
|    | O | 0.56860000  | 3.21410000  | 0.25080000  |
|    | O | 0.98030000  | 1.30140000  | 1.35460000  |
|    | C | 1.74320000  | 3.78090000  | 0.85840000  |
|    | N | 2.70750000  | -0.20730000 | -1.46010000 |
|    | O | 3.91730000  | -0.09100000 | -1.64970000 |
|    | O | 1.84290000  | 0.33760000  | -2.14850000 |
|    | H | 4.88260000  | -2.25380000 | 1.61560000  |
|    | H | 4.99240000  | -0.65330000 | 0.85010000  |
|    | H | 5.07090000  | -2.09130000 | -0.14620000 |
|    | H | -0.23860000 | -0.70580000 | -1.59660000 |
|    | H | -0.86490000 | -2.01730000 | -0.59380000 |
|    | H | -0.98650000 | -0.21560000 | 1.30130000  |
|    | H | -2.65350000 | -0.91130000 | -1.99120000 |
|    | H | -5.04960000 | -1.39250000 | -2.16810000 |
|    | H | -6.52260000 | -1.16210000 | -0.18920000 |
|    | H | -5.55440000 | -0.44310000 | 1.97750000  |
|    | H | -3.14830000 | 0.04210000  | 2.15570000  |
|    | H | -1.40590000 | 3.19930000  | -1.03490000 |
|    | H | -2.59970000 | 1.81350000  | -1.29090000 |
|    | H | 1.79130000  | 4.80160000  | 0.49400000  |
|    | H | 2.62930000  | 3.22640000  | 0.55770000  |
|    | H | 1.65700000  | 3.76240000  | 1.94250000  |
| 11 | N | -2.16910000 | -1.76220000 | 1.84420000  |
|    | C | -2.99980000 | -1.47150000 | 0.88330000  |
|    | C | -2.27130000 | -1.04080000 | -0.27350000 |
|    | C | -0.94370000 | -1.09360000 | 0.07270000  |
|    | O | -0.86960000 | -1.52340000 | 1.32920000  |
|    | C | -4.46700000 | -1.61810000 | 1.10250000  |
|    | C | 0.34260000  | -0.80950000 | -0.61810000 |
|    | C | 1.22870000  | 0.22050000  | 0.14260000  |
|    | C | 0.55560000  | 1.57320000  | 0.32120000  |
|    | C | -0.20900000 | 2.17530000  | -0.68100000 |

---

---

|    |   |             |             |             |
|----|---|-------------|-------------|-------------|
|    | C | -0.78900000 | 3.42520000  | -0.48070000 |
|    | C | -0.61470000 | 4.09430000  | 0.72530000  |
|    | C | 0.14080000  | 3.50320000  | 1.73290000  |
|    | C | 0.71760000  | 2.25490000  | 1.52990000  |
|    | C | 2.59660000  | 0.30760000  | -0.53010000 |
|    | C | 3.02190000  | 1.34110000  | -1.25500000 |
|    | C | 3.56210000  | -0.83180000 | -0.36270000 |
|    | O | 3.10900000  | -1.75930000 | 0.51010000  |
|    | O | 4.62870000  | -0.92490000 | -0.92030000 |
|    | C | 3.99130000  | -2.87240000 | 0.74810000  |
|    | N | -2.82480000 | -0.63740000 | -1.52890000 |
|    | O | -4.04970000 | -0.62630000 | -1.62510000 |
|    | O | -2.05540000 | -0.32720000 | -2.43800000 |
|    | H | -4.64290000 | -1.98340000 | 2.11120000  |
|    | H | -4.89540000 | -2.31230000 | 0.38150000  |
|    | H | -4.97240000 | -0.66380000 | 0.96520000  |
|    | H | 0.89190000  | -1.74970000 | -0.68560000 |
|    | H | 0.12960000  | -0.47940000 | -1.62820000 |
|    | H | 1.39350000  | -0.18900000 | 1.13820000  |
|    | H | -0.36510000 | 1.67440000  | -1.62620000 |
|    | H | -1.37960000 | 3.87150000  | -1.26910000 |
|    | H | -1.06790000 | 5.06350000  | 0.88120000  |
|    | H | 0.27670000  | 4.01000000  | 2.67860000  |
|    | H | 1.29910000  | 1.80060000  | 2.32190000  |
|    | H | 4.00560000  | 1.31600000  | -1.70010000 |
|    | H | 2.41270000  | 2.21900000  | -1.40710000 |
|    | H | 3.47100000  | -3.50730000 | 1.45740000  |
|    | H | 4.93420000  | -2.52340000 | 1.16280000  |
|    | H | 4.18560000  | -3.40630000 | -0.17930000 |
| 13 | N | 3.07430000  | 0.36540000  | 2.07600000  |
|    | C | 3.74660000  | 0.11060000  | 0.98940000  |
|    | C | 2.89340000  | -0.52800000 | 0.03080000  |
|    | C | 1.66180000  | -0.63610000 | 0.63020000  |
|    | O | 1.75860000  | -0.11100000 | 1.84780000  |
|    | C | 5.18530000  | 0.49050000  | 0.90120000  |
|    | C | 0.34310000  | -1.21710000 | 0.25380000  |
|    | C | -0.84690000 | -0.23600000 | 0.41470000  |
|    | C | -2.16280000 | -0.99700000 | 0.26000000  |
|    | C | -2.94580000 | -1.27020000 | 1.38160000  |
|    | C | -4.12720000 | -1.99560000 | 1.26590000  |
|    | C | -4.54300000 | -2.45830000 | 0.02210000  |
|    | C | -3.77180000 | -2.18730000 | -1.10380000 |
|    | C | -2.59250000 | -1.45990000 | -0.98490000 |
|    | C | -0.78610000 | 0.97070000  | -0.50430000 |
|    | C | -0.09070000 | 1.04730000  | -1.63910000 |
|    | C | -1.59420000 | 2.13770000  | -0.02280000 |
|    | O | -1.71730000 | 3.11730000  | -0.93870000 |
|    | O | -2.08120000 | 2.20220000  | 1.08230000  |
|    | C | -2.45670000 | 4.27500000  | -0.51070000 |
|    | N | 3.25870000  | -0.95580000 | -1.28290000 |
|    | O | 4.43120000  | -0.80830000 | -1.61780000 |

---

---

|    |   |             |             |             |
|----|---|-------------|-------------|-------------|
|    | O | 2.38740000  | -1.44140000 | -2.00610000 |
|    | H | 5.48520000  | 0.97230000  | 1.82840000  |
|    | H | 5.35290000  | 1.16800000  | 0.06560000  |
|    | H | 5.80390000  | -0.38840000 | 0.72790000  |
|    | H | 0.40880000  | -1.61410000 | -0.75300000 |
|    | H | 0.16000000  | -2.06290000 | 0.92040000  |
|    | H | -0.82580000 | 0.14750000  | 1.43320000  |
|    | H | -2.63550000 | -0.90020000 | 2.34990000  |
|    | H | -4.72380000 | -2.19280000 | 2.14610000  |
|    | H | -5.46200000 | -3.02060000 | -0.07050000 |
|    | H | -4.08960000 | -2.53840000 | -2.07620000 |
|    | H | -2.01060000 | -1.24440000 | -1.87140000 |
|    | H | -0.11790000 | 1.94210000  | -2.24140000 |
|    | H | 0.52000000  | 0.23100000  | -1.99810000 |
|    | H | -1.97250000 | 4.73980000  | 0.34540000  |
|    | H | -3.47260000 | 3.99660000  | -0.23950000 |
|    | H | -2.45800000 | 4.94740000  | -1.36220000 |
| 14 | N | -3.02550000 | -2.54830000 | -0.49180000 |
|    | C | -3.60110000 | -1.41660000 | -0.19720000 |
|    | C | -2.63990000 | -0.51890000 | 0.37140000  |
|    | C | -1.44880000 | -1.20040000 | 0.39900000  |
|    | O | -1.66790000 | -2.41150000 | -0.11260000 |
|    | C | -5.05470000 | -1.23030000 | -0.47070000 |
|    | C | -0.05540000 | -0.91380000 | 0.83330000  |
|    | C | 0.89720000  | -0.67440000 | -0.37860000 |
|    | C | 2.36810000  | -0.90700000 | -0.03320000 |
|    | C | 2.92190000  | -0.60960000 | 1.21260000  |
|    | C | 4.26630000  | -0.86030000 | 1.46880000  |
|    | C | 5.08170000  | -1.40770000 | 0.48430000  |
|    | C | 4.54160000  | -1.70630000 | -0.76190000 |
|    | C | 3.19690000  | -1.45890000 | -1.01330000 |
|    | C | 0.64360000  | 0.66160000  | -1.06480000 |
|    | C | 0.20310000  | 0.72330000  | -2.32220000 |
|    | C | 0.89720000  | 1.91160000  | -0.28050000 |
|    | O | 0.67740000  | 3.03410000  | -0.98980000 |
|    | O | 1.25900000  | 1.92230000  | 0.87310000  |
|    | C | 0.85970000  | 4.26600000  | -0.26800000 |
|    | N | -2.88050000 | 0.81830000  | 0.81950000  |
|    | O | -4.03190000 | 1.24120000  | 0.73540000  |
|    | O | -1.93150000 | 1.46390000  | 1.25820000  |
|    | H | -5.45310000 | -2.13700000 | -0.91930000 |
|    | H | -5.21460000 | -0.38820000 | -1.14180000 |
|    | H | -5.59280000 | -1.01030000 | 0.44970000  |
|    | H | -0.05190000 | -0.06130000 | 1.50280000  |
|    | H | 0.30070000  | -1.79050000 | 1.37550000  |
|    | H | 0.64760000  | -1.43370000 | -1.11990000 |
|    | H | 2.31380000  | -0.15920000 | 1.98160000  |
|    | H | 4.67640000  | -0.62150000 | 2.44070000  |
|    | H | 6.12610000  | -1.60170000 | 0.68670000  |
|    | H | 5.16230000  | -2.13760000 | -1.53550000 |
|    | H | 2.78490000  | -1.70170000 | -1.98490000 |

---

---

|    |   |             |             |             |
|----|---|-------------|-------------|-------------|
|    | H | 0.02690000  | 1.66820000  | -2.81210000 |
|    | H | 0.01140000  | -0.17750000 | -2.89000000 |
|    | H | 0.63480000  | 5.05270000  | -0.98040000 |
|    | H | 1.88480000  | 4.34970000  | 0.08590000  |
|    | H | 0.18010000  | 4.30860000  | 0.58000000  |
| 15 | N | -3.52160000 | 1.18510000  | -0.81490000 |
|    | C | -3.76370000 | 0.14620000  | -0.06490000 |
|    | C | -2.65150000 | -0.75330000 | -0.11390000 |
|    | C | -1.72800000 | -0.17190000 | -0.94710000 |
|    | O | -2.23500000 | 0.98010000  | -1.37240000 |
|    | C | -5.05390000 | 0.04480000  | 0.67440000  |
|    | C | -0.37720000 | -0.55080000 | -1.43930000 |
|    | C | 0.74080000  | -0.32420000 | -0.38720000 |
|    | C | 0.84640000  | 1.14180000  | 0.02910000  |
|    | C | 1.29360000  | 2.11690000  | -0.86440000 |
|    | C | 1.35630000  | 3.45310000  | -0.48640000 |
|    | C | 0.97620000  | 3.83470000  | 0.79670000  |
|    | C | 0.53790000  | 2.87070000  | 1.69740000  |
|    | C | 0.47640000  | 1.53430000  | 1.31500000  |
|    | C | 2.08050000  | -0.86620000 | -0.85250000 |
|    | C | 2.40040000  | -1.18240000 | -2.10670000 |
|    | C | 3.06660000  | -1.07080000 | 0.25870000  |
|    | O | 4.32110000  | -1.29770000 | -0.17580000 |
|    | O | 2.76620000  | -1.04760000 | 1.42910000  |
|    | C | 5.29610000  | -1.53990000 | 0.85470000  |
|    | N | -2.52710000 | -2.01530000 | 0.54190000  |
|    | O | -3.46680000 | -2.38720000 | 1.24130000  |
|    | O | -1.49070000 | -2.65630000 | 0.36580000  |
|    | H | -4.87630000 | -0.03590000 | 1.74550000  |
|    | H | -5.59910000 | -0.84820000 | 0.37370000  |
|    | H | -5.65490000 | 0.92710000  | 0.46890000  |
|    | H | -0.39580000 | -1.60620000 | -1.70610000 |
|    | H | -0.18560000 | 0.03540000  | -2.33720000 |
|    | H | 0.47280000  | -0.89440000 | 0.50040000  |
|    | H | 1.60360000  | 1.83380000  | -1.86200000 |
|    | H | 1.70330000  | 4.19520000  | -1.19250000 |
|    | H | 1.02500000  | 4.87390000  | 1.09180000  |
|    | H | 0.24820000  | 3.15550000  | 2.69970000  |
|    | H | 0.15380000  | 0.78650000  | 2.02700000  |
|    | H | 3.38200000  | -1.55800000 | -2.34960000 |
|    | H | 1.69860000  | -1.08370000 | -2.92200000 |
|    | H | 6.23480000  | -1.69460000 | 0.33320000  |
|    | H | 5.02690000  | -2.42160000 | 1.43210000  |
|    | H | 5.36290000  | -0.68260000 | 1.52070000  |
| 17 | N | -3.67320000 | 0.30230000  | 1.70580000  |
|    | C | -3.87650000 | -0.03410000 | 0.46260000  |
|    | C | -2.68160000 | -0.60130000 | -0.08570000 |
|    | C | -1.74770000 | -0.57340000 | 0.92140000  |
|    | O | -2.32760000 | -0.04080000 | 1.99270000  |
|    | C | -5.21040000 | 0.19360000  | -0.16210000 |

---

---

|    |   |             |             |             |
|----|---|-------------|-------------|-------------|
|    | C | -0.32660000 | -0.99860000 | 1.04570000  |
|    | C | 0.68510000  | -0.10950000 | 0.26720000  |
|    | C | 2.04560000  | -0.80730000 | 0.24620000  |
|    | C | 2.96020000  | -0.67120000 | 1.29090000  |
|    | C | 4.17190000  | -1.35590000 | 1.26760000  |
|    | C | 4.48680000  | -2.18510000 | 0.19700000  |
|    | C | 3.58220000  | -2.32520000 | -0.85130000 |
|    | C | 2.37230000  | -1.64100000 | -0.82540000 |
|    | C | 0.78140000  | 1.32200000  | 0.76300000  |
|    | C | 0.41280000  | 1.75760000  | 1.96680000  |
|    | C | 1.36500000  | 2.35140000  | -0.16610000 |
|    | O | 1.48830000  | 1.88590000  | -1.42480000 |
|    | O | 1.67910000  | 3.47190000  | 0.15650000  |
|    | C | 2.04620000  | 2.80850000  | -2.37800000 |
|    | N | -2.50110000 | -1.12760000 | -1.40030000 |
|    | O | -3.44860000 | -1.05070000 | -2.17860000 |
|    | O | -1.41140000 | -1.63160000 | -1.67570000 |
|    | H | -5.87500000 | 0.64860000  | 0.56800000  |
|    | H | -5.63670000 | -0.74600000 | -0.50950000 |
|    | H | -5.11980000 | 0.84330000  | -1.03090000 |
|    | H | -0.07390000 | -1.04300000 | 2.10410000  |
|    | H | -0.24220000 | -2.00650000 | 0.64340000  |
|    | H | 0.34050000  | -0.07690000 | -0.76320000 |
|    | H | 2.73520000  | -0.01770000 | 2.12280000  |
|    | H | 4.87050000  | -1.23550000 | 2.08440000  |
|    | H | 5.42990000  | -2.71370000 | 0.17680000  |
|    | H | 3.81920000  | -2.96400000 | -1.69130000 |
|    | H | 1.67400000  | -1.75260000 | -1.64480000 |
|    | H | 0.54760000  | 2.79800000  | 2.22390000  |
|    | H | -0.02960000 | 1.11350000  | 2.71070000  |
|    | H | 2.07200000  | 2.27070000  | -3.31980000 |
|    | H | 3.04830000  | 3.10280000  | -2.07450000 |
|    | H | 1.42120000  | 3.69500000  | -2.45690000 |
| 21 | N | -3.41960000 | 1.32780000  | -0.75870000 |
|    | C | -3.66920000 | 0.28320000  | -0.01930000 |
|    | C | -2.59080000 | -0.65200000 | -0.12690000 |
|    | C | -1.67970000 | -0.08600000 | -0.98450000 |
|    | O | -2.16270000 | 1.09040000  | -1.36860000 |
|    | C | -4.93420000 | 0.21030000  | 0.76540000  |
|    | C | -0.36470000 | -0.50020000 | -1.54070000 |
|    | C | 0.80380000  | -0.37700000 | -0.52420000 |
|    | C | 0.96860000  | 1.05900000  | -0.02980000 |
|    | C | 1.50150000  | 2.05200000  | -0.85350000 |
|    | C | 1.60770000  | 3.36470000  | -0.40770000 |
|    | C | 1.18520000  | 3.70500000  | 0.87350000  |
|    | C | 0.65900000  | 2.72280000  | 1.70510000  |
|    | C | 0.55450000  | 1.41050000  | 1.25510000  |
|    | C | 2.09970000  | -0.93430000 | -1.08920000 |
|    | C | 2.33290000  | -1.20670000 | -2.37210000 |
|    | C | 3.22730000  | -1.21270000 | -0.13330000 |
|    | O | 2.82160000  | -1.18150000 | 1.15030000  |

---



---

|    |   |             |             |             |
|----|---|-------------|-------------|-------------|
|    | O | 4.36340000  | -1.45630000 | -0.46210000 |
|    | C | 3.84140000  | -1.44620000 | 2.13080000  |
|    | N | -2.48290000 | -1.92700000 | 0.50480000  |
|    | O | -3.40650000 | -2.28060000 | 1.23430000  |
|    | O | -1.47360000 | -2.59710000 | 0.28150000  |
|    | H | -5.51210000 | 1.11570000  | 0.59830000  |
|    | H | -4.72110000 | 0.10250000  | 1.82760000  |
|    | H | -5.51990000 | -0.65810000 | 0.46840000  |
|    | H | -0.44120000 | -1.53930000 | -1.85760000 |
|    | H | -0.17610000 | 0.12120000  | -2.41510000 |
|    | H | 0.54040000  | -0.99020000 | 0.33520000  |
|    | H | 1.84520000  | 1.79980000  | -1.84810000 |
|    | H | 2.02300000  | 4.12060000  | -1.06010000 |
|    | H | 1.26860000  | 4.72550000  | 1.22080000  |
|    | H | 0.33270000  | 2.97530000  | 2.70490000  |
|    | H | 0.15580000  | 0.64910000  | 1.91290000  |
|    | H | 3.29670000  | -1.59010000 | -2.67270000 |
|    | H | 1.59020000  | -1.06350000 | -3.14240000 |
|    | H | 3.34390000  | -1.37540000 | 3.09220000  |
|    | H | 4.63810000  | -0.71000000 | 2.05350000  |
|    | H | 4.25670000  | -2.44070000 | 1.98430000  |
| 23 | N | 3.30000000  | 0.08110000  | 1.51530000  |
|    | C | 3.36330000  | -0.77800000 | 0.53670000  |
|    | C | 2.04160000  | -1.17880000 | 0.16040000  |
|    | C | 1.18360000  | -0.49080000 | 0.98350000  |
|    | O | 1.92340000  | 0.25930000  | 1.79570000  |
|    | C | 4.68800000  | -1.19340000 | -0.00540000 |
|    | C | -0.29230000 | -0.41890000 | 1.16420000  |
|    | C | -1.05720000 | 0.33170000  | 0.02810000  |
|    | C | -0.48830000 | 1.70480000  | -0.29020000 |
|    | C | -0.10460000 | 2.61380000  | 0.69890000  |
|    | C | 0.39200000  | 3.86900000  | 0.36150000  |
|    | C | 0.51340000  | 4.23920000  | -0.97320000 |
|    | C | 0.13740000  | 3.34340000  | -1.96860000 |
|    | C | -0.35680000 | 2.08950000  | -1.62680000 |
|    | C | -2.54850000 | 0.35770000  | 0.36510000  |
|    | C | -3.22770000 | 1.44600000  | 0.72390000  |
|    | C | -3.34080000 | -0.91750000 | 0.26860000  |
|    | O | -2.63070000 | -1.90720000 | -0.30600000 |
|    | O | -4.48180000 | -1.05280000 | 0.64130000  |
|    | C | -3.31630000 | -3.16120000 | -0.47570000 |
|    | N | 1.68250000  | -2.12750000 | -0.84310000 |
|    | O | 2.59150000  | -2.64540000 | -1.48860000 |
|    | O | 0.48670000  | -2.37490000 | -0.99840000 |
|    | H | 5.47500000  | -0.67200000 | 0.53370000  |
|    | H | 4.75640000  | -0.96350000 | -1.06730000 |
|    | H | 4.82430000  | -2.26870000 | 0.09740000  |
|    | H | -0.68140000 | -1.43410000 | 1.20980000  |
|    | H | -0.47880000 | 0.06050000  | 2.12400000  |
|    | H | -0.94570000 | -0.28210000 | -0.86360000 |
|    | H | -0.18200000 | 2.34740000  | 1.74390000  |

---

---

|    |   |             |             |             |
|----|---|-------------|-------------|-------------|
|    | H | 0.68840000  | 4.55450000  | 1.14370000  |
|    | H | 0.90230000  | 5.21360000  | -1.23490000 |
|    | H | 0.23230000  | 3.61730000  | -3.01050000 |
|    | H | -0.64390000 | 1.39780000  | -2.40850000 |
|    | H | -4.28150000 | 1.36900000  | 0.94790000  |
|    | H | -2.76000000 | 2.41620000  | 0.78830000  |
|    | H | -3.63200000 | -3.55300000 | 0.48870000  |
|    | H | -2.59420000 | -3.82080000 | -0.94450000 |
|    | H | -4.18970000 | -3.02900000 | -1.11020000 |
| 24 | N | -3.29960000 | 1.60300000  | 0.68340000  |
|    | C | -3.78060000 | 0.46420000  | 0.26920000  |
|    | C | -2.74690000 | -0.52630000 | 0.27490000  |
|    | C | -1.61450000 | 0.10520000  | 0.72660000  |
|    | O | -1.93130000 | 1.37260000  | 0.97420000  |
|    | C | -5.21570000 | 0.35850000  | -0.11940000 |
|    | C | -0.21060000 | -0.30740000 | 0.98780000  |
|    | C | 0.64400000  | -0.43260000 | -0.30270000 |
|    | C | 2.05460000  | -0.96510000 | -0.03460000 |
|    | C | 2.60710000  | -1.08480000 | 1.23970000  |
|    | C | 3.89030000  | -1.59650000 | 1.41720000  |
|    | C | 4.64510000  | -1.99600000 | 0.32180000  |
|    | C | 4.10500000  | -1.88260000 | -0.95570000 |
|    | C | 2.82440000  | -1.37340000 | -1.12820000 |
|    | C | 0.65610000  | 0.83150000  | -1.15280000 |
|    | C | 0.08920000  | 0.86490000  | -2.35900000 |
|    | C | 1.32440000  | 2.09570000  | -0.69260000 |
|    | O | 1.69590000  | 2.03930000  | 0.60220000  |
|    | O | 1.50920000  | 3.06500000  | -1.38780000 |
|    | C | 2.34950000  | 3.21750000  | 1.11080000  |
|    | N | -2.86170000 | -1.90020000 | -0.09400000 |
|    | O | -3.97070000 | -2.30780000 | -0.43170000 |
|    | O | -1.84510000 | -2.59470000 | -0.05310000 |
|    | H | -5.69160000 | 1.32870000  | -0.00100000 |
|    | H | -5.72640000 | -0.37790000 | 0.49870000  |
|    | H | -5.31060000 | 0.02820000  | -1.15250000 |
|    | H | 0.22280000  | 0.42360000  | 1.66480000  |
|    | H | -0.22670000 | -1.28060000 | 1.47550000  |
|    | H | 0.14830000  | -1.18950000 | -0.91090000 |
|    | H | 2.04900000  | -0.77750000 | 2.11160000  |
|    | H | 4.29670000  | -1.68120000 | 2.41600000  |
|    | H | 5.64110000  | -2.39330000 | 0.46050000  |
|    | H | 4.67880000  | -2.19350000 | -1.81820000 |
|    | H | 2.41670000  | -1.28960000 | -2.12710000 |
|    | H | 0.12040000  | 1.76530000  | -2.95480000 |
|    | H | -0.40900000 | -0.00200000 | -2.77060000 |
|    | H | 2.58520000  | 2.99440000  | 2.14610000  |
|    | H | 1.68550000  | 4.07590000  | 1.04260000  |
|    | H | 3.25620000  | 3.41850000  | 0.54510000  |
| 25 | N | 3.18740000  | -0.45970000 | 1.85660000  |
|    | C | 3.35870000  | -1.04200000 | 0.70270000  |

---

---

|   |             |             |             |
|---|-------------|-------------|-------------|
| C | 2.08890000  | -1.27120000 | 0.08330000  |
| C | 1.14480000  | -0.77690000 | 0.94960000  |
| O | 1.78960000  | -0.29360000 | 2.00970000  |
| C | 4.73460000  | -1.36550000 | 0.22950000  |
| C | -0.34040000 | -0.68200000 | 0.98380000  |
| C | -0.97740000 | 0.24820000  | -0.09760000 |
| C | -0.25960000 | 1.57640000  | -0.26420000 |
| C | 0.14630000  | 2.35530000  | 0.82270000  |
| C | 0.79150000  | 3.57250000  | 0.62740000  |
| C | 1.04160000  | 4.03410000  | -0.66040000 |
| C | 0.64470000  | 3.26800000  | -1.75130000 |
| C | 0.00180000  | 2.05120000  | -1.55160000 |
| C | -2.47250000 | 0.40000000  | 0.17750000  |
| C | -3.07310000 | 1.54520000  | 0.50150000  |
| C | -3.27910000 | -0.85120000 | 0.00900000  |
| O | -4.58450000 | -0.69420000 | 0.30420000  |
| O | -2.81380000 | -1.90450000 | -0.36350000 |
| C | -5.40210000 | -1.86610000 | 0.13500000  |
| N | 1.84870000  | -1.90780000 | -1.17180000 |
| O | 2.82850000  | -2.27470000 | -1.81840000 |
| O | 0.68130000  | -2.05550000 | -1.52860000 |
| H | 5.45540000  | -1.04070000 | 0.97590000  |
| H | 4.93950000  | -0.87060000 | -0.71820000 |
| H | 4.84040000  | -2.43550000 | 0.05920000  |
| H | -0.75770000 | -1.67700000 | 0.83860000  |
| H | -0.61100000 | -0.34230000 | 1.98300000  |
| H | -0.89020000 | -0.29370000 | -1.03760000 |
| H | -0.03170000 | 2.01370000  | 1.83320000  |
| H | 1.10270000  | 4.15620000  | 1.48300000  |
| H | 1.54640000  | 4.97830000  | -0.81200000 |
| H | 0.83970000  | 3.61320000  | -2.75760000 |
| H | -0.29790000 | 1.45800000  | -2.40610000 |
| H | -4.13810000 | 1.58100000  | 0.66900000  |
| H | -2.51870000 | 2.46690000  | 0.59380000  |
| H | -5.36850000 | -2.20700000 | -0.89740000 |
| H | -6.40670000 | -1.55770000 | 0.40480000  |
| H | -5.05810000 | -2.66640000 | 0.78660000  |

---

[a] Conformers are numbered according to their appearance during conformational search.

---

**3g**Conf. no.<sup>[a]</sup>

---

|   |   |             |             |             |
|---|---|-------------|-------------|-------------|
| 1 | N | -2.80020000 | -1.35660000 | 2.07650000  |
|   | C | -3.51120000 | -0.91040000 | 1.07960000  |
|   | C | -2.72720000 | -0.92580000 | -0.11980000 |
|   | C | -1.49310000 | -1.40470000 | 0.24060000  |
|   | O | -1.52340000 | -1.66610000 | 1.54430000  |
|   | C | -4.92330000 | -0.48960000 | 1.30510000  |
|   | C | -0.21830000 | -1.67290000 | -0.47760000 |
|   | C | 0.97930000  | -0.89330000 | 0.11940000  |
|   | C | 0.75350000  | 0.61810000  | 0.08180000  |
|   | C | 0.64050000  | 1.30780000  | -1.12770000 |
|   | C | 0.40680000  | 2.67580000  | -1.14870000 |
|   | C | 0.28400000  | 3.40730000  | 0.03640000  |
|   | C | 0.40270000  | 2.71610000  | 1.24060000  |
|   | C | 0.63460000  | 1.34360000  | 1.26450000  |
|   | C | 2.29230000  | -1.27130000 | -0.54340000 |
|   | C | 2.42140000  | -1.85230000 | -1.73590000 |
|   | C | 3.50230000  | -0.96130000 | 0.28570000  |
|   | O | 4.65450000  | -1.01930000 | -0.40890000 |
|   | O | 3.45410000  | -0.69970000 | 1.46520000  |
|   | C | 5.84920000  | -0.77110000 | 0.35400000  |
|   | N | -3.15400000 | -0.52010000 | -1.42430000 |
|   | O | -4.26980000 | -0.01370000 | -1.51630000 |
|   | O | -2.39480000 | -0.70260000 | -2.37470000 |
|   | H | -5.18140000 | -0.64790000 | 2.34920000  |
|   | H | -5.60040000 | -1.05890000 | 0.67030000  |
|   | H | -5.05400000 | 0.56040000  | 1.04980000  |
|   | H | -0.01370000 | -2.74450000 | -0.40990000 |
|   | H | -0.37550000 | -1.42940000 | -1.52270000 |
|   | H | 1.07190000  | -1.17200000 | 1.16770000  |
|   | H | 0.73550000  | 0.77680000  | -2.06590000 |
|   | H | 0.31760000  | 3.18320000  | -2.10110000 |
|   | C | 0.04320000  | 4.89550000  | 0.00380000  |
|   | H | 0.31400000  | 3.25390000  | 2.17590000  |
|   | H | 0.73130000  | 0.83470000  | 2.21410000  |
|   | H | 3.39620000  | -2.07630000 | -2.14020000 |
|   | H | 1.56660000  | -2.12110000 | -2.33930000 |
|   | H | 6.66620000  | -0.85090000 | -0.35540000 |
|   | H | 5.95420000  | -1.50930000 | 1.14610000  |
|   | H | 5.81770000  | 0.22320000  | 0.79360000  |
|   | H | 0.91530000  | 5.42770000  | -0.38190000 |
|   | H | -0.79910000 | 5.14630000  | -0.64250000 |
|   | H | -0.16870000 | 5.28450000  | 0.99860000  |
| 2 | N | -3.28430000 | -1.01820000 | 1.85200000  |
|   | C | -3.67960000 | -0.79510000 | 0.63040000  |
|   | C | -2.57890000 | -0.95630000 | -0.27300000 |
|   | C | -1.49540000 | -1.28480000 | 0.50220000  |
|   | O | -1.90370000 | -1.32590000 | 1.76960000  |

---

---

|   |             |             |             |             |
|---|-------------|-------------|-------------|-------------|
| C | -5.10290000 | -0.43940000 | 0.36560000  |             |
| C | -0.06010000 | -1.58540000 | 0.25030000  |             |
| C | 0.88190000  | -0.61970000 | 1.02340000  |             |
| C | 0.74590000  | 0.84200000  | 0.60040000  |             |
| C | 0.66870000  | 1.24990000  | -0.73320000 |             |
| C | 0.55440000  | 2.59700000  | -1.05720000 |             |
| C | 0.51490000  | 3.58450000  | -0.07130000 |             |
| C | 0.58610000  | 3.17330000  | 1.25970000  |             |
| C | 0.69880000  | 1.82750000  | 1.58790000  |             |
| C | 2.33010000  | -1.09700000 | 1.01900000  |             |
| C | 2.95750000  | -1.41220000 | 2.15280000  |             |
| C | 3.03720000  | -1.23130000 | -0.29250000 |             |
| O | 4.37460000  | -1.32770000 | -0.16440000 |             |
| O | 2.47790000  | -1.26830000 | -1.36510000 |             |
| C | 5.10300000  | -1.50400000 | -1.39330000 |             |
| N | -2.61420000 | -0.79980000 | -1.69550000 |             |
| O | -3.67170000 | -0.41130000 | -2.18920000 |             |
| O | -1.60200000 | -1.06220000 | -2.34000000 |             |
| H | -5.65060000 | -0.43400000 | 1.30480000  |             |
| H | -5.55680000 | -1.15400000 | -0.31890000 |             |
| H | -5.17050000 | 0.53980000  | -0.10490000 |             |
| H | 0.13040000  | -2.60350000 | 0.59910000  |             |
| H | 0.12960000  | -1.56370000 | -0.81430000 |             |
| H | 0.57700000  | -0.66380000 | 2.06830000  |             |
| H | 0.70210000  | 0.52030000  | -1.52790000 |             |
| H | 0.48960000  | 2.88200000  | -2.09980000 |             |
| C | 0.41530000  | 5.04430000  | -0.43520000 |             |
| H | 0.54340000  | 3.91100000  | 2.05100000  |             |
| H | 0.74150000  | 1.54020000  | 2.63130000  |             |
| H | 3.98720000  | -1.73440000 | 2.15770000  |             |
| H | 2.44820000  | -1.35380000 | 3.10540000  |             |
| H | 6.14720000  | -1.55700000 | -1.10370000 |             |
| H | 4.93110000  | -0.66130000 | -2.05890000 |             |
| H | 4.79430000  | -2.42120000 | -1.89000000 |             |
| H | -0.21570000 | 5.19300000  | -1.31140000 |             |
| H | 0.00130000  | 5.63080000  | 0.38420000  |             |
| H | 1.39910000  | 5.45780000  | -0.66980000 |             |
|   |             |             |             |             |
| 3 | N           | 3.54290000  | 0.06910000  | -1.43020000 |
|   | C           | 3.65660000  | -0.88510000 | -0.54820000 |
|   | C           | 2.36210000  | -1.39010000 | -0.21110000 |
|   | C           | 1.46530000  | -0.66210000 | -0.94990000 |
|   | O           | 2.15380000  | 0.20430000  | -1.68790000 |
|   | C           | 5.00370000  | -1.28310000 | -0.05050000 |
|   | C           | -0.01360000 | -0.66060000 | -1.09080000 |
|   | C           | -0.76750000 | 0.18140000  | -0.01230000 |
|   | C           | -2.25920000 | -0.11420000 | -0.02460000 |
|   | C           | -2.98510000 | -0.35600000 | -1.18980000 |
|   | C           | -4.35610000 | -0.60040000 | -1.14420000 |
|   | C           | -5.04910000 | -0.61390000 | 0.06390000  |
|   | C           | -4.31930000 | -0.37350000 | 1.23150000  |
|   | C           | -2.95430000 | -0.13080000 | 1.18780000  |

---

---

|   |             |             |             |             |
|---|-------------|-------------|-------------|-------------|
| C | -0.45240000 | 1.67030000  | -0.13830000 |             |
| C | -1.21140000 | 2.54710000  | -0.79490000 |             |
| C | 0.78760000  | 2.12100000  | 0.56860000  |             |
| O | 1.11380000  | 3.40130000  | 0.32140000  |             |
| O | 1.43300000  | 1.40710000  | 1.30510000  |             |
| C | 2.29890000  | 3.87920000  | 0.98400000  |             |
| N | 2.05080000  | -2.42150000 | 0.72310000  |             |
| O | 2.99060000  | -3.00040000 | 1.26470000  |             |
| O | 0.86360000  | -2.67400000 | 0.93010000  |             |
| H | 5.76120000  | -0.67120000 | -0.53410000 |             |
| H | 5.19370000  | -2.33460000 | -0.25810000 |             |
| H | 5.06320000  | -1.15500000 | 1.02910000  |             |
| H | -0.24660000 | -0.28590000 | -2.08660000 |             |
| H | -0.35940000 | -1.68820000 | -1.01040000 |             |
| H | -0.38280000 | -0.14070000 | 0.95330000  |             |
| H | -2.49210000 | -0.36070000 | -2.15240000 |             |
| H | -4.89050000 | -0.78600000 | -2.06730000 |             |
| C | -6.52890000 | -0.89730000 | 0.12030000  |             |
| H | -4.82530000 | -0.38350000 | 2.18890000  |             |
| H | -2.41570000 | 0.04370000  | 2.11050000  |             |
| H | -0.93040000 | 3.58650000  | -0.85870000 |             |
| H | -2.13400000 | 2.24600000  | -1.26990000 |             |
| H | 2.40200000  | 4.91470000  | 0.67710000  |             |
| H | 3.16420000  | 3.29870000  | 0.67230000  |             |
| H | 2.18570000  | 3.80730000  | 2.06340000  |             |
| H | -7.05460000 | -0.14430000 | 0.70910000  |             |
| H | -6.96850000 | -0.91240000 | -0.87590000 |             |
| H | -6.72680000 | -1.86570000 | 0.58460000  |             |
| 4 | N           | -2.65160000 | -1.30600000 | 2.13280000  |
|   | C           | -3.40260000 | -0.81230000 | 1.18900000  |
|   | C           | -2.69680000 | -0.84200000 | -0.05770000 |
|   | C           | -1.46550000 | -1.38070000 | 0.21650000  |
|   | O           | -1.42560000 | -1.66260000 | 1.51640000  |
|   | C           | -4.77760000 | -0.33370000 | 1.50870000  |
|   | C           | -0.25040000 | -1.69070000 | -0.58320000 |
|   | C           | 1.01760000  | -0.97710000 | -0.04570000 |
|   | C           | 0.84840000  | 0.54210000  | -0.05340000 |
|   | C           | 0.84390000  | 1.26840000  | -1.24560000 |
|   | C           | 0.64830000  | 2.64330000  | -1.24180000 |
|   | C           | 0.45590000  | 3.34450000  | -0.04870000 |
|   | C           | 0.46150000  | 2.61560000  | 1.14000000  |
|   | C           | 0.65590000  | 1.23770000  | 1.13870000  |
|   | C           | 2.26760000  | -1.40980000 | -0.79310000 |
|   | C           | 2.28920000  | -2.03250000 | -1.97090000 |
|   | C           | 3.60460000  | -1.11390000 | -0.17160000 |
|   | O           | 3.49330000  | -0.75780000 | 1.12340000  |
|   | O           | 4.66460000  | -1.19900000 | -0.74350000 |
|   | C           | 4.73050000  | -0.45330000 | 1.79210000  |
|   | N           | -3.18580000 | -0.39530000 | -1.32700000 |
|   | O           | -4.27790000 | 0.16790000  | -1.33890000 |
|   | O           | -2.49980000 | -0.60140000 | -2.32640000 |

---

---

|   |   |             |             |             |
|---|---|-------------|-------------|-------------|
|   | H | -4.97790000 | -0.49900000 | 2.56440000  |
|   | H | -5.51750000 | -0.86120000 | 0.90890000  |
|   | H | -4.87640000 | 0.72540000  | 1.27750000  |
|   | H | -0.09270000 | -2.77170000 | -0.54730000 |
|   | H | -0.45560000 | -1.41660000 | -1.61230000 |
|   | H | 1.14460000  | -1.27670000 | 0.99330000  |
|   | H | 0.99730000  | 0.76040000  | -2.18850000 |
|   | H | 0.64500000  | 3.17970000  | -2.18230000 |
|   | C | 0.27130000  | 4.84090000  | -0.05050000 |
|   | H | 0.31110000  | 3.12840000  | 2.08160000  |
|   | H | 0.65690000  | 0.69900000  | 2.07720000  |
|   | H | 3.23500000  | -2.28170000 | -2.42910000 |
|   | H | 1.38980000  | -2.30460000 | -2.50230000 |
|   | H | 5.38660000  | -1.32070000 | 1.78800000  |
|   | H | 4.45340000  | -0.18580000 | 2.80640000  |
|   | H | 5.23100000  | 0.37650000  | 1.29830000  |
|   | H | 1.22710000  | 5.35390000  | -0.17930000 |
|   | H | -0.37910000 | 5.15940000  | -0.86550000 |
|   | H | -0.16430000 | 5.18840000  | 0.88530000  |
| 5 | N | 3.10600000  | 0.78890000  | 1.80990000  |
|   | C | 3.70310000  | 0.17020000  | 0.82990000  |
|   | C | 2.78600000  | -0.72890000 | 0.19800000  |
|   | C | 1.59610000  | -0.59950000 | 0.87460000  |
|   | O | 1.77650000  | 0.29910000  | 1.83630000  |
|   | C | 5.13420000  | 0.45810000  | 0.52900000  |
|   | C | 0.25200000  | -1.22390000 | 0.76190000  |
|   | C | -0.56470000 | -0.69340000 | -0.45370000 |
|   | C | -0.83430000 | 0.80880000  | -0.41680000 |
|   | C | -1.32180000 | 1.47530000  | 0.71090000  |
|   | C | -1.55340000 | 2.84410000  | 0.68220000  |
|   | C | -1.31020000 | 3.60200000  | -0.46590000 |
|   | C | -0.82310000 | 2.93590000  | -1.58880000 |
|   | C | -0.58920000 | 1.56460000  | -1.56320000 |
|   | C | -1.82630000 | -1.51670000 | -0.69110000 |
|   | C | -1.99080000 | -2.21290000 | -1.81680000 |
|   | C | -2.87010000 | -1.56610000 | 0.37820000  |
|   | O | -4.06070000 | -2.01080000 | -0.06620000 |
|   | O | -2.67750000 | -1.25960000 | 1.53450000  |
|   | C | -5.09130000 | -2.13010000 | 0.93100000  |
|   | N | 3.04980000  | -1.60320000 | -0.89680000 |
|   | O | 4.18820000  | -1.60940000 | -1.36040000 |
|   | O | 2.12480000  | -2.30270000 | -1.31490000 |
|   | H | 5.50100000  | 1.21210000  | 1.22100000  |
|   | H | 5.24680000  | 0.81410000  | -0.49370000 |
|   | H | 5.73480000  | -0.44540000 | 0.62000000  |
|   | H | 0.38620000  | -2.29720000 | 0.63280000  |
|   | H | -0.28650000 | -1.05550000 | 1.68930000  |
|   | H | 0.05310000  | -0.87530000 | -1.33050000 |
|   | H | -1.53010000 | 0.92540000  | 1.61600000  |
|   | H | -1.92730000 | 3.33280000  | 1.57340000  |
|   | C | -1.56320000 | 5.08840000  | -0.47970000 |

---

---

|   |   |             |             |             |
|---|---|-------------|-------------|-------------|
|   | H | -0.61800000 | 3.49280000  | -2.49420000 |
|   | H | -0.20710000 | 1.07760000  | -2.45190000 |
|   | H | -2.88540000 | -2.78770000 | -1.99920000 |
|   | H | -1.22350000 | -2.22630000 | -2.57880000 |
|   | H | -5.96550000 | -2.49070000 | 0.39920000  |
|   | H | -5.29110000 | -1.16290000 | 1.38650000  |
|   | H | -4.79320000 | -2.83550000 | 1.70360000  |
|   | H | -2.61370000 | 5.31230000  | -0.28490000 |
|   | H | -0.97780000 | 5.59560000  | 0.28920000  |
|   | H | -1.30190000 | 5.52620000  | -1.44180000 |
| 6 | N | -2.13180000 | -1.97110000 | 2.02610000  |
|   | C | -2.87740000 | -1.96980000 | 0.95750000  |
|   | C | -2.07770000 | -1.66090000 | -0.19090000 |
|   | C | -0.79900000 | -1.47540000 | 0.27620000  |
|   | O | -0.81850000 | -1.65960000 | 1.59250000  |
|   | C | -4.33420000 | -2.26500000 | 1.07000000  |
|   | C | 0.51450000  | -1.15330000 | -0.34210000 |
|   | C | 1.20010000  | 0.09250000  | 0.29270000  |
|   | C | 0.35050000  | 1.35040000  | 0.22500000  |
|   | C | -0.41710000 | 1.68850000  | -0.89000000 |
|   | C | -1.16610000 | 2.86220000  | -0.91400000 |
|   | C | -1.17490000 | 3.73900000  | 0.16950000  |
|   | C | -0.41060000 | 3.39530000  | 1.28740000  |
|   | C | 0.33620000  | 2.22530000  | 1.31380000  |
|   | C | 2.59040000  | 0.26500000  | -0.31220000 |
|   | C | 2.93910000  | 1.24350000  | -1.14710000 |
|   | C | 3.59380000  | -0.75580000 | 0.12610000  |
|   | O | 4.79830000  | -0.61600000 | -0.45910000 |
|   | O | 3.35410000  | -1.62400000 | 0.93610000  |
|   | C | 5.80050000  | -1.56420000 | -0.05010000 |
|   | N | -2.53110000 | -1.55840000 | -1.54210000 |
|   | O | -3.72990000 | -1.73660000 | -1.74810000 |
|   | O | -1.70930000 | -1.29990000 | -2.42170000 |
|   | H | -4.58010000 | -2.45950000 | 2.11090000  |
|   | H | -4.59910000 | -3.12920000 | 0.46320000  |
|   | H | -4.92400000 | -1.42620000 | 0.70440000  |
|   | H | 1.16960000  | -2.01200000 | -0.18750000 |
|   | H | 0.37240000  | -1.02650000 | -1.40940000 |
|   | H | 1.35320000  | -0.14640000 | 1.34510000  |
|   | H | -0.44890000 | 1.03650000  | -1.75230000 |
|   | H | -1.75740000 | 3.09200000  | -1.79120000 |
|   | C | -1.97070000 | 5.01940000  | 0.13720000  |
|   | H | -0.40660000 | 4.04640000  | 2.15260000  |
|   | H | 0.91080000  | 1.98210000  | 2.19860000  |
|   | H | 3.94260000  | 1.30600000  | -1.53790000 |
|   | H | 2.23270000  | 2.00310000  | -1.44720000 |
|   | H | 5.98510000  | -1.48380000 | 1.01890000  |
|   | H | 6.69030000  | -1.30390000 | -0.61350000 |
|   | H | 5.48160000  | -2.57790000 | -0.28230000 |
|   | H | -2.71620000 | 5.00320000  | -0.65640000 |
|   | H | -2.48650000 | 5.19030000  | 1.08250000  |

---



---

|   |   |             |             |             |
|---|---|-------------|-------------|-------------|
|   | H | -1.32160000 | 5.88050000  | -0.03740000 |
| 7 | N | 3.35430000  | -1.20360000 | 1.82470000  |
|   | C | 3.96490000  | -0.92170000 | 0.70790000  |
|   | C | 3.00430000  | -0.75510000 | -0.34040000 |
|   | C | 1.77300000  | -0.94780000 | 0.23460000  |
|   | O | 1.96850000  | -1.21470000 | 1.52400000  |
|   | C | 5.45240000  | -0.83070000 | 0.67550000  |
|   | C | 0.37310000  | -0.93230000 | -0.27260000 |
|   | C | -0.65950000 | -0.40350000 | 0.75430000  |
|   | C | -2.09700000 | -0.67590000 | 0.31370000  |
|   | C | -2.53750000 | -0.52890000 | -1.00270000 |
|   | C | -3.85910000 | -0.79500000 | -1.34410000 |
|   | C | -4.78910000 | -1.21120000 | -0.39090000 |
|   | C | -4.34530000 | -1.36060000 | 0.92360000  |
|   | C | -3.02510000 | -1.09780000 | 1.26770000  |
|   | C | -0.44150000 | 1.05430000  | 1.15110000  |
|   | C | -0.15070000 | 1.39670000  | 2.40690000  |
|   | C | -0.54090000 | 2.10350000  | 0.09010000  |
|   | O | -0.64420000 | 3.35120000  | 0.58680000  |
|   | O | -0.51650000 | 1.87290000  | -1.09830000 |
|   | C | -0.69470000 | 4.40550000  | -0.39160000 |
|   | N | 3.27620000  | -0.46280000 | -1.71420000 |
|   | O | 4.43160000  | -0.15580000 | -2.00470000 |
|   | O | 2.35170000  | -0.54110000 | -2.51930000 |
|   | H | 5.84770000  | -1.06130000 | 1.66170000  |
|   | H | 5.76750000  | 0.16760000  | 0.37740000  |
|   | H | 5.86390000  | -1.52560000 | -0.05490000 |
|   | H | 0.35310000  | -0.36250000 | -1.19400000 |
|   | H | 0.10340000  | -1.96040000 | -0.53170000 |
|   | H | -0.51510000 | -0.97180000 | 1.67190000  |
|   | H | -1.85560000 | -0.19330000 | -1.76930000 |
|   | H | -4.16970000 | -0.67710000 | -2.37470000 |
|   | C | -6.22720000 | -1.46910000 | -0.76340000 |
|   | H | -5.03670000 | -1.69410000 | 1.68720000  |
|   | H | -2.71090000 | -1.23030000 | 2.29570000  |
|   | H | -0.01440000 | 2.42800000  | 2.69280000  |
|   | H | -0.03450000 | 0.64520000  | 3.17560000  |
|   | H | -0.77620000 | 5.32430000  | 0.17950000  |
|   | H | -1.55830000 | 4.27880000  | -1.04040000 |
|   | H | 0.20980000  | 4.40690000  | -0.99600000 |
|   | H | -6.31470000 | -1.82270000 | -1.79030000 |
|   | H | -6.68000000 | -2.21330000 | -0.10890000 |
|   | H | -6.82270000 | -0.55660000 | -0.68120000 |
| 8 | N | -3.74280000 | 1.01730000  | 0.89820000  |
|   | C | -4.04170000 | -0.13450000 | 0.36540000  |
|   | C | -2.86330000 | -0.94130000 | 0.26950000  |
|   | C | -1.83940000 | -0.18790000 | 0.79150000  |
|   | O | -2.35200000 | 0.97940000  | 1.16910000  |
|   | C | -5.44680000 | -0.42760000 | -0.03680000 |
|   | C | -0.38350000 | -0.39910000 | 1.00420000  |

---

---

|   |             |             |             |             |
|---|-------------|-------------|-------------|-------------|
| C | 0.45730000  | -0.22850000 | -0.29640000 |             |
| C | 1.91750000  | -0.62090000 | -0.07910000 |             |
| C | 2.51670000  | -1.49940000 | -0.98370000 |             |
| C | 3.84050000  | -1.89530000 | -0.83640000 |             |
| C | 4.61710000  | -1.42860000 | 0.22430000  |             |
| C | 4.01400000  | -0.55730000 | 1.13240000  |             |
| C | 2.69020000  | -0.15720000 | 0.98730000  |             |
| C | 0.29510000  | 1.13040000  | -0.96890000 |             |
| C | -0.14330000 | 1.22420000  | -2.22560000 |             |
| C | 0.62560000  | 2.36710000  | -0.19430000 |             |
| O | 0.61170000  | 3.48260000  | -0.94780000 |             |
| O | 0.87100000  | 2.38340000  | 0.99140000  |             |
| C | 0.87810000  | 4.70980000  | -0.24530000 |             |
| N | -2.76420000 | -2.26610000 | -0.25120000 |             |
| O | -3.80260000 | -2.81120000 | -0.62010000 |             |
| O | -1.64830000 | -2.78470000 | -0.30350000 |             |
| H | -6.06930000 | 0.43730000  | 0.17900000  |             |
| H | -5.82560000 | -1.29490000 | 0.50110000  |             |
| H | -5.50180000 | -0.66250000 | -1.09850000 |             |
| H | -0.05210000 | 0.30120000  | 1.76480000  |             |
| H | -0.23190000 | -1.41650000 | 1.35900000  |             |
| H | 0.05810000  | -0.95080000 | -1.00620000 |             |
| H | 1.93790000  | -1.89110000 | -1.81060000 |             |
| H | 4.27050000  | -2.58460000 | -1.55210000 |             |
| C | 6.06140000  | -1.83490000 | 0.37330000  |             |
| H | 4.58680000  | -0.18380000 | 1.97210000  |             |
| H | 2.26670000  | 0.52960000  | 1.70410000  |             |
| H | -0.24700000 | 2.17800000  | -2.71880000 |             |
| H | -0.40450000 | 0.33910000  | -2.79000000 |             |
| H | 1.86710000  | 4.68110000  | 0.20640000  |             |
| H | 0.13320000  | 4.87160000  | 0.53070000  |             |
| H | 0.82350000  | 5.48940000  | -0.99790000 |             |
| H | 6.23960000  | -2.82790000 | -0.03850000 |             |
| H | 6.72030000  | -1.14030000 | -0.15350000 |             |
| H | 6.36630000  | -1.84210000 | 1.41940000  |             |
| 9 | N           | 3.91470000  | 0.16890000  | -1.65710000 |
|   | C           | 4.11540000  | -0.37160000 | -0.48750000 |
|   | C           | 2.88530000  | -0.90120000 | 0.01770000  |
|   | C           | 1.93350000  | -0.63380000 | -0.93550000 |
|   | O           | 2.53500000  | -0.00020000 | -1.93860000 |
|   | C           | 5.48060000  | -0.36720000 | 0.11060000  |
|   | C           | 0.47450000  | -0.89950000 | -1.05830000 |
|   | C           | -0.41910000 | 0.01000000  | -0.16880000 |
|   | C           | -1.84710000 | -0.53380000 | -0.16090000 |
|   | C           | -2.73520000 | -0.29490000 | -1.20910000 |
|   | C           | -4.01220000 | -0.84550000 | -1.20110000 |
|   | C           | -4.44740000 | -1.64640000 | -0.14440000 |
|   | C           | -3.55520000 | -1.88130000 | 0.90320000  |
|   | C           | -2.27770000 | -1.33460000 | 0.89700000  |
|   | C           | -0.37870000 | 1.48400000  | -0.52520000 |
|   | C           | -0.04230000 | 1.99440000  | -1.70940000 |

---

---

|    |   |             |             |             |
|----|---|-------------|-------------|-------------|
|    | C | -0.74990000 | 2.38980000  | 0.61080000  |
|    | O | -0.99950000 | 3.65600000  | 0.22460000  |
|    | O | -0.80910000 | 2.02780000  | 1.76290000  |
|    | C | -1.31960000 | 4.57370000  | 1.28550000  |
|    | N | 2.68600000  | -1.60050000 | 1.24690000  |
|    | O | 3.66210000  | -1.75320000 | 1.97760000  |
|    | O | 1.55390000  | -2.01320000 | 1.49820000  |
|    | H | 6.16750000  | 0.13370000  | -0.56700000 |
|    | H | 5.82230000  | -1.38480000 | 0.29240000  |
|    | H | 5.47550000  | 0.14360000  | 1.07200000  |
|    | H | 0.19700000  | -0.81550000 | -2.10810000 |
|    | H | 0.29230000  | -1.92670000 | -0.74950000 |
|    | H | -0.05140000 | -0.07650000 | 0.85140000  |
|    | H | -2.43690000 | 0.33410000  | -2.03740000 |
|    | H | -4.68070000 | -0.64600000 | -2.02920000 |
|    | C | -5.84440000 | -2.21340000 | -0.11970000 |
|    | H | -3.86260000 | -2.49910000 | 1.73750000  |
|    | H | -1.60750000 | -1.53110000 | 1.72340000  |
|    | H | -0.05820000 | 3.06000000  | -1.87710000 |
|    | H | 0.27000000  | 1.37470000  | -2.53660000 |
|    | H | -1.49370000 | 5.52780000  | 0.79900000  |
|    | H | -0.49210000 | 4.64590000  | 1.98800000  |
|    | H | -2.21040000 | 4.24400000  | 1.81530000  |
|    | H | -6.53730000 | -1.52730000 | 0.37350000  |
|    | H | -6.22090000 | -2.38760000 | -1.12730000 |
|    | H | -5.88000000 | -3.15730000 | 0.42360000  |
| 10 | N | 2.59300000  | -2.39480000 | 1.45000000  |
|    | C | 3.36010000  | -1.79280000 | 0.58570000  |
|    | C | 2.55650000  | -1.10440000 | -0.37840000 |
|    | C | 1.25230000  | -1.33310000 | -0.01780000 |
|    | O | 1.26020000  | -2.11000000 | 1.06020000  |
|    | C | 4.84180000  | -1.89030000 | 0.71380000  |
|    | C | -0.08340000 | -0.98710000 | -0.57160000 |
|    | C | -0.90900000 | 0.04690000  | 0.27080000  |
|    | C | -2.40270000 | -0.19930000 | 0.12840000  |
|    | C | -3.00070000 | -0.55480000 | -1.08120000 |
|    | C | -4.37590000 | -0.74790000 | -1.17220000 |
|    | C | -5.20350000 | -0.59660000 | -0.06000000 |
|    | C | -4.60360000 | -0.23960000 | 1.14930000  |
|    | C | -3.23120000 | -0.04620000 | 1.24140000  |
|    | C | -0.52040000 | 1.49000000  | -0.04650000 |
|    | C | -1.24260000 | 2.31800000  | -0.80070000 |
|    | C | 0.74830000  | 1.96010000  | 0.58770000  |
|    | O | 1.08990000  | 3.21550000  | 0.25140000  |
|    | O | 1.40360000  | 1.28060000  | 1.34870000  |
|    | C | 2.30340000  | 3.71220000  | 0.84350000  |
|    | N | 3.01580000  | -0.29940000 | -1.46090000 |
|    | O | 4.22930000  | -0.24880000 | -1.65600000 |
|    | O | 2.18000000  | 0.30420000  | -2.13570000 |
|    | H | 5.08650000  | -2.49940000 | 1.58040000  |
|    | H | 5.28100000  | -0.90050000 | 0.82800000  |

---

|    |   |             |             |             |
|----|---|-------------|-------------|-------------|
|    | H | 5.27750000  | -2.33230000 | -0.18050000 |
|    | H | 0.04260000  | -0.63810000 | -1.59130000 |
|    | H | -0.65180000 | -1.91750000 | -0.59250000 |
|    | H | -0.65160000 | -0.12350000 | 1.31570000  |
|    | H | -2.39810000 | -0.68200000 | -1.97070000 |
|    | H | -4.80950000 | -1.02010000 | -2.12620000 |
|    | C | -6.68900000 | -0.83860000 | -0.15120000 |
|    | H | -5.21670000 | -0.11440000 | 2.03290000  |
|    | H | -2.79640000 | 0.22830000  | 2.19420000  |
|    | H | -0.90630000 | 3.32460000  | -0.99300000 |
|    | H | -2.18230000 | 2.01100000  | -1.23500000 |
|    | H | 2.40380000  | 4.73020000  | 0.48220000  |
|    | H | 3.15240000  | 3.11030000  | 0.52740000  |
|    | H | 2.23240000  | 3.69370000  | 1.92870000  |
|    | H | -7.24140000 | -0.17200000 | 0.51070000  |
|    | H | -7.05420000 | -0.68740000 | -1.16630000 |
|    | H | -6.93770000 | -1.86260000 | 0.13740000  |
| 11 | N | -1.73980000 | -2.25900000 | 1.91700000  |
|    | C | -2.58910000 | -2.18390000 | 0.93160000  |
|    | C | -1.92560000 | -1.70430000 | -0.24490000 |
|    | C | -0.61730000 | -1.49490000 | 0.11600000  |
|    | O | -0.49390000 | -1.82300000 | 1.39900000  |
|    | C | -4.01110000 | -2.57560000 | 1.14710000  |
|    | C | 0.61120000  | -1.02540000 | -0.57910000 |
|    | C | 1.27430000  | 0.20110000  | 0.11380000  |
|    | C | 0.35880000  | 1.41280000  | 0.19350000  |
|    | C | -0.49870000 | 1.78910000  | -0.84020000 |
|    | C | -1.30350000 | 2.92010000  | -0.72640000 |
|    | C | -1.28080000 | 3.71460000  | 0.41840000  |
|    | C | -0.42550000 | 3.33250000  | 1.45510000  |
|    | C | 0.37660000  | 2.20530000  | 1.34430000  |
|    | C | 2.61420000  | 0.49630000  | -0.55700000 |
|    | C | 2.85070000  | 1.54170000  | -1.34810000 |
|    | C | 3.77200000  | -0.42950000 | -0.31290000 |
|    | O | 3.49060000  | -1.36270000 | 0.62420000  |
|    | O | 4.84320000  | -0.36140000 | -0.86550000 |
|    | C | 4.56160000  | -2.27340000 | 0.93500000  |
|    | N | -2.51710000 | -1.48560000 | -1.52810000 |
|    | O | -3.72430000 | -1.69100000 | -1.63250000 |
|    | O | -1.79610000 | -1.10850000 | -2.45150000 |
|    | H | -4.13950000 | -2.90400000 | 2.17550000  |
|    | H | -4.29610000 | -3.37740000 | 0.46810000  |
|    | H | -4.67390000 | -1.73600000 | 0.94500000  |
|    | H | 1.32550000  | -1.85000000 | -0.57260000 |
|    | H | 0.36570000  | -0.81100000 | -1.61290000 |
|    | H | 1.49470000  | -0.10230000 | 1.13630000  |
|    | H | -0.55860000 | 1.20180000  | -1.74610000 |
|    | H | -1.96300000 | 3.18130000  | -1.54410000 |
|    | C | -2.13890000 | 4.94880000  | 0.53610000  |
|    | H | -0.39190000 | 3.91980000  | 2.36420000  |
|    | H | 1.02410000  | 1.93200000  | 2.16800000  |

---

|    |   |             |             |             |
|----|---|-------------|-------------|-------------|
|    | H | 3.82830000  | 1.67260000  | -1.78810000 |
|    | H | 2.09000000  | 2.27760000  | -1.55950000 |
|    | H | 4.16450000  | -2.93850000 | 1.69470000  |
|    | H | 5.42280000  | -1.72730000 | 1.31280000  |
|    | H | 4.85410000  | -2.83050000 | 0.04780000  |
|    | H | -1.53780000 | 5.85560000  | 0.43850000  |
|    | H | -2.90380000 | 4.97520000  | -0.23850000 |
|    | H | -2.63720000 | 4.99490000  | 1.50500000  |
| 13 | N | -3.40030000 | 0.07150000  | -2.06260000 |
|    | C | -4.01950000 | -0.29150000 | -0.97540000 |
|    | C | -3.07590000 | -0.81880000 | -0.03390000 |
|    | C | -1.84720000 | -0.74420000 | -0.64450000 |
|    | O | -2.02870000 | -0.21890000 | -1.85240000 |
|    | C | -5.49650000 | -0.11880000 | -0.87090000 |
|    | C | -0.45650000 | -1.13890000 | -0.28740000 |
|    | C | 0.58020000  | 0.00650000  | -0.42910000 |
|    | C | 1.99140000  | -0.55880000 | -0.28310000 |
|    | C | 2.48290000  | -0.98990000 | 0.94960000  |
|    | C | 3.75010000  | -1.54990000 | 1.05550000  |
|    | C | 4.57410000  | -1.69150000 | -0.06290000 |
|    | C | 4.08070000  | -1.25430000 | -1.29240000 |
|    | C | 2.81180000  | -0.69590000 | -1.40130000 |
|    | C | 0.34380000  | 1.17560000  | 0.51050000  |
|    | C | -0.33510000 | 1.12270000  | 1.65650000  |
|    | C | 0.95100000  | 2.46220000  | 0.03910000  |
|    | O | 0.93440000  | 3.43520000  | 0.97050000  |
|    | O | 1.40490000  | 2.61970000  | -1.07080000 |
|    | C | 1.47970000  | 4.69930000  | 0.55290000  |
|    | N | -3.36520000 | -1.31660000 | 1.27400000  |
|    | O | -4.54350000 | -1.33850000 | 1.62060000  |
|    | O | -2.42810000 | -1.69070000 | 1.98110000  |
|    | H | -5.86950000 | 0.32840000  | -1.78900000 |
|    | H | -5.75010000 | 0.51740000  | -0.02460000 |
|    | H | -5.98390000 | -1.07810000 | -0.70600000 |
|    | H | -0.45770000 | -1.56360000 | 0.71030000  |
|    | H | -0.15800000 | -1.93420000 | -0.97400000 |
|    | H | 0.50360000  | 0.40050000  | -1.44090000 |
|    | H | 1.87680000  | -0.88500000 | 1.84000000  |
|    | H | 4.10410000  | -1.88110000 | 2.02380000  |
|    | C | 5.96110000  | -2.26980000 | 0.06180000  |
|    | H | 4.69610000  | -1.34860000 | -2.17820000 |
|    | H | 2.45950000  | -0.35500000 | -2.36610000 |
|    | H | -0.44030000 | 1.99970000  | 2.27630000  |
|    | H | -0.80170000 | 0.21310000  | 2.00760000  |
|    | H | 1.39090000  | 5.35110000  | 1.41570000  |
|    | H | 0.91640000  | 5.09690000  | -0.28860000 |
|    | H | 2.52190000  | 4.58490000  | 0.26320000  |
|    | H | 6.00460000  | -3.03380000 | 0.83790000  |
|    | H | 6.29000000  | -2.71900000 | -0.87460000 |
|    | H | 6.68630000  | -1.49640000 | 0.32580000  |

---

---

|    |   |             |             |             |
|----|---|-------------|-------------|-------------|
| 15 | N | -3.15460000 | -2.72480000 | -0.46270000 |
|    | C | -3.80640000 | -1.63890000 | -0.15480000 |
|    | C | -2.90250000 | -0.67090000 | 0.39200000  |
|    | C | -1.66330000 | -1.26150000 | 0.39280000  |
|    | O | -1.80300000 | -2.48650000 | -0.11380000 |
|    | C | -5.27560000 | -1.56220000 | -0.39520000 |
|    | C | -0.28570000 | -0.87070000 | 0.79390000  |
|    | C | 0.60960000  | -0.53540000 | -0.43910000 |
|    | C | 2.10270000  | -0.66910000 | -0.14330000 |
|    | C | 2.67660000  | -0.37330000 | 1.09380000  |
|    | C | 4.04160000  | -0.53200000 | 1.30060000  |
|    | C | 4.88580000  | -0.98330000 | 0.28440000  |
|    | C | 4.30970000  | -1.27980000 | -0.95040000 |
|    | C | 2.94360000  | -1.12720000 | -1.15830000 |
|    | C | 0.24090000  | 0.79530000  | -1.08210000 |
|    | C | -0.24620000 | 0.85650000  | -2.32210000 |
|    | C | 0.43340000  | 2.04030000  | -0.27300000 |
|    | O | 0.12340000  | 3.16290000  | -0.94820000 |
|    | O | 0.82310000  | 2.04780000  | 0.87150000  |
|    | C | 0.23980000  | 4.38560000  | -0.19800000 |
|    | N | -3.23230000 | 0.64440000  | 0.84710000  |
|    | O | -4.41430000 | 0.97920000  | 0.79190000  |
|    | O | -2.32440000 | 1.36030000  | 1.26320000  |
|    | H | -5.61520000 | -2.49680000 | -0.83490000 |
|    | H | -5.51330000 | -0.73540000 | -1.06230000 |
|    | H | -5.80740000 | -1.38170000 | 0.53730000  |
|    | H | -0.32970000 | -0.03130000 | 1.47830000  |
|    | H | 0.15460000  | -1.72500000 | 1.30900000  |
|    | H | 0.39050000  | -1.29280000 | -1.19200000 |
|    | H | 2.06500000  | 0.00250000  | 1.89950000  |
|    | H | 4.45680000  | -0.29700000 | 2.27270000  |
|    | C | 6.36940000  | -1.12600000 | 0.51260000  |
|    | H | 4.93210000  | -1.64360000 | -1.75810000 |
|    | H | 2.52670000  | -1.37510000 | -2.12670000 |
|    | H | -0.50510000 | 1.79820000  | -2.78040000 |
|    | H | -0.39430000 | -0.04160000 | -2.90700000 |
|    | H | -0.04880000 | 5.17360000  | -0.88560000 |
|    | H | 1.26390000  | 4.52680000  | 0.14030000  |
|    | H | -0.42490000 | 4.36300000  | 0.66250000  |
|    | H | 6.58180000  | -1.54570000 | 1.49620000  |
|    | H | 6.82620000  | -1.77190000 | -0.23620000 |
|    | H | 6.86980000  | -0.15620000 | 0.45980000  |
| 17 | N | -3.96410000 | -0.10430000 | 1.72560000  |
|    | C | -4.13150000 | -0.43870000 | 0.47650000  |
|    | C | -2.87720000 | -0.83370000 | -0.08980000 |
|    | C | -1.94660000 | -0.70450000 | 0.91270000  |
|    | O | -2.58300000 | -0.27450000 | 1.99810000  |
|    | C | -5.48880000 | -0.37480000 | -0.13590000 |
|    | C | -0.48160000 | -0.94360000 | 1.02080000  |
|    | C | 0.40340000  | 0.08140000  | 0.25460000  |
|    | C | 1.84180000  | -0.43450000 | 0.21990000  |

---

---

|    |   |             |             |             |
|----|---|-------------|-------------|-------------|
|    | C | 2.74720000  | -0.18360000 | 1.24860000  |
|    | C | 4.03360000  | -0.71470000 | 1.21140000  |
|    | C | 4.45830000  | -1.50860000 | 0.14710000  |
|    | C | 3.54670000  | -1.75700000 | -0.88250000 |
|    | C | 2.26300000  | -1.22930000 | -0.84840000 |
|    | C | 0.31420000  | 1.50500000  | 0.77310000  |
|    | C | -0.10720000 | 1.87080000  | 1.98290000  |
|    | C | 0.76030000  | 2.61540000  | -0.13870000 |
|    | O | 0.94310000  | 2.18970000  | -1.40430000 |
|    | O | 0.92760000  | 3.76210000  | 0.20160000  |
|    | C | 1.37660000  | 3.19160000  | -2.34150000 |
|    | N | -2.64040000 | -1.30680000 | -1.41550000 |
|    | O | -3.59610000 | -1.33990000 | -2.18690000 |
|    | O | -1.49640000 | -1.65870000 | -1.70700000 |
|    | H | -6.20280000 | -0.03390000 | 0.60960000  |
|    | H | -5.78740000 | -1.35300000 | -0.50910000 |
|    | H | -5.49370000 | 0.30560000  | -0.98570000 |
|    | H | -0.21660000 | -0.97400000 | 2.07660000  |
|    | H | -0.27060000 | -1.92480000 | 0.59950000  |
|    | H | 0.05240000  | 0.08580000  | -0.77430000 |
|    | H | 2.45680000  | 0.43830000  | 2.08460000  |
|    | H | 4.71680000  | -0.50380000 | 2.02430000  |
|    | C | 5.85980000  | -2.06210000 | 0.09180000  |
|    | H | 3.84520000  | -2.37070000 | -1.72330000 |
|    | H | 1.57750000  | -1.43800000 | -1.65970000 |
|    | H | -0.10810000 | 2.91580000  | 2.25620000  |
|    | H | -0.46300000 | 1.16340000  | 2.71560000  |
|    | H | 1.47650000  | 2.67580000  | -3.29070000 |
|    | H | 2.32970000  | 3.61220000  | -2.02900000 |
|    | H | 0.63970000  | 3.98860000  | -2.41150000 |
|    | H | 6.33310000  | -2.04320000 | 1.07260000  |
|    | H | 5.86600000  | -3.09160000 | -0.26720000 |
|    | H | 6.48620000  | -1.47900000 | -0.58720000 |
| 19 | N | -3.37100000 | -2.35270000 | -0.43150000 |
|    | C | -3.94010000 | -1.25970000 | -0.00770000 |
|    | C | -2.95300000 | -0.38650000 | 0.55620000  |
|    | C | -1.75220000 | -1.03960000 | 0.43300000  |
|    | O | -1.98830000 | -2.21190000 | -0.15190000 |
|    | C | -5.41350000 | -1.08670000 | -0.15450000 |
|    | C | -0.34110000 | -0.74160000 | 0.79850000  |
|    | C | 0.61630000  | -0.78870000 | -0.42200000 |
|    | C | 2.09300000  | -0.73010000 | -0.02860000 |
|    | C | 2.54590000  | -0.36740000 | 1.23660000  |
|    | C | 3.90670000  | -0.35710000 | 1.53540000  |
|    | C | 4.86170000  | -0.70440000 | 0.58350000  |
|    | C | 4.40540000  | -1.06510000 | -0.68770000 |
|    | C | 3.05130000  | -1.07830000 | -0.98600000 |
|    | C | 0.25400000  | 0.22640000  | -1.50080000 |
|    | C | -0.19460000 | -0.15820000 | -2.69610000 |
|    | C | 0.38680000  | 1.70730000  | -1.27830000 |
|    | O | 0.73050000  | 2.00590000  | -0.01290000 |

---

---

|    |   |             |             |             |
|----|---|-------------|-------------|-------------|
|    | O | 0.19630000  | 2.54520000  | -2.12730000 |
|    | C | 0.84410000  | 3.40950000  | 0.28880000  |
|    | N | -3.18600000 | 0.90310000  | 1.13340000  |
|    | O | -4.33870000 | 1.32790000  | 1.10800000  |
|    | O | -2.23310000 | 1.50880000  | 1.62010000  |
|    | H | -5.83210000 | -1.97250000 | -0.62590000 |
|    | H | -5.63780000 | -0.20920000 | -0.75820000 |
|    | H | -5.88070000 | -0.93340000 | 0.81680000  |
|    | H | -0.31110000 | 0.22210000  | 1.29090000  |
|    | H | -0.02020000 | -1.50320000 | 1.51330000  |
|    | H | 0.46820000  | -1.76410000 | -0.88730000 |
|    | H | 1.84690000  | -0.07750000 | 2.00750000  |
|    | H | 4.22520000  | -0.07000000 | 2.52950000  |
|    | C | 6.33460000  | -0.70310000 | 0.90550000  |
|    | H | 5.11930000  | -1.34170000 | -1.45360000 |
|    | H | 2.73240000  | -1.36090000 | -1.98120000 |
|    | H | -0.43850000 | 0.57500000  | -3.45090000 |
|    | H | -0.32670000 | -1.20370000 | -2.93800000 |
|    | H | -0.11240000 | 3.90370000  | 0.13720000  |
|    | H | 1.59600000  | 3.87140000  | -0.34660000 |
|    | H | 1.13780000  | 3.45800000  | 1.33180000  |
|    | H | 6.52080000  | -0.32320000 | 1.90890000  |
|    | H | 6.75170000  | -1.71050000 | 0.84850000  |
|    | H | 6.89350000  | -0.08300000 | 0.20280000  |
| 21 | N | -3.33640000 | 1.40210000  | -0.90480000 |
|    | C | -3.69680000 | 0.48260000  | -0.05340000 |
|    | C | -2.74540000 | -0.58670000 | -0.06730000 |
|    | C | -1.79020000 | -0.23490000 | -0.98940000 |
|    | O | -2.13230000 | 0.94480000  | -1.49560000 |
|    | C | -4.94310000 | 0.65390000  | 0.74610000  |
|    | C | -0.54790000 | -0.86750000 | -1.50540000 |
|    | C | 0.64820000  | -0.77150000 | -0.51810000 |
|    | C | 0.99770000  | 0.67950000  | -0.19710000 |
|    | C | 1.64420000  | 1.49710000  | -1.12620000 |
|    | C | 1.91620000  | 2.82760000  | -0.83830000 |
|    | C | 1.55730000  | 3.39110000  | 0.38890000  |
|    | C | 0.91670000  | 2.57100000  | 1.31610000  |
|    | C | 0.64380000  | 1.23680000  | 1.02920000  |
|    | C | 1.85400000  | -1.54660000 | -1.02210000 |
|    | C | 2.02660000  | -1.99100000 | -2.26600000 |
|    | C | 2.95930000  | -1.84930000 | -0.04770000 |
|    | O | 2.58630000  | -1.62470000 | 1.22660000  |
|    | O | 4.05190000  | -2.26290000 | -0.35350000 |
|    | C | 3.58700000  | -1.89660000 | 2.22410000  |
|    | N | -2.78340000 | -1.78990000 | 0.69880000  |
|    | O | -3.72570000 | -1.94170000 | 1.47330000  |
|    | O | -1.87340000 | -2.60440000 | 0.53910000  |
|    | H | -5.40640000 | 1.60310000  | 0.48870000  |
|    | H | -4.72120000 | 0.63140000  | 1.81170000  |
|    | H | -5.64000000 | -0.15890000 | 0.54880000  |
|    | H | -0.75630000 | -1.91850000 | -1.69970000 |

---



---

|    |   |             |             |             |
|----|---|-------------|-------------|-------------|
|    | H | -0.30420000 | -0.37670000 | -2.44660000 |
|    | H | 0.33120000  | -1.24460000 | 0.40930000  |
|    | H | 1.94570000  | 1.09200000  | -2.08350000 |
|    | H | 2.41710000  | 3.43810000  | -1.57920000 |
|    | C | 1.86970000  | 4.83320000  | 0.69900000  |
|    | H | 0.62760000  | 2.97700000  | 2.27710000  |
|    | H | 0.15540000  | 0.62190000  | 1.77430000  |
|    | H | 2.93040000  | -2.52210000 | -2.52590000 |
|    | H | 1.29160000  | -1.84640000 | -3.04340000 |
|    | H | 3.87630000  | -2.94460000 | 2.19320000  |
|    | H | 3.12230000  | -1.65430000 | 3.17390000  |
|    | H | 4.46510000  | -1.27730000 | 2.05540000  |
|    | H | 1.55050000  | 5.49070000  | -0.11070000 |
|    | H | 1.37310000  | 5.15870000  | 1.61180000  |
|    | H | 2.94300000  | 4.98380000  | 0.83340000  |
| 22 | N | 3.11350000  | 0.11740000  | 2.09160000  |
|    | C | 3.61800000  | -0.48450000 | 1.05070000  |
|    | C | 2.56570000  | -1.06790000 | 0.27270000  |
|    | C | 1.39760000  | -0.76200000 | 0.92560000  |
|    | O | 1.71140000  | -0.06220000 | 2.01240000  |
|    | C | 5.09310000  | -0.48650000 | 0.83590000  |
|    | C | -0.04490000 | -1.03580000 | 0.69130000  |
|    | C | -0.86760000 | 0.22060000  | 0.27440000  |
|    | C | -2.36370000 | -0.06500000 | 0.28430000  |
|    | C | -2.91590000 | -1.29520000 | -0.06900000 |
|    | C | -4.29560000 | -1.48860000 | -0.06950000 |
|    | C | -5.17160000 | -0.46500000 | 0.28420000  |
|    | C | -4.61620000 | 0.76690000  | 0.64100000  |
|    | C | -3.24270000 | 0.96100000  | 0.64320000  |
|    | C | -0.38670000 | 0.79280000  | -1.06290000 |
|    | C | -0.79850000 | 0.34690000  | -2.24820000 |
|    | C | 0.60290000  | 1.92180000  | -1.08320000 |
|    | O | 0.86080000  | 2.39970000  | 0.15320000  |
|    | O | 1.11480000  | 2.37440000  | -2.07940000 |
|    | C | 1.79140000  | 3.49610000  | 0.21600000  |
|    | N | 2.71510000  | -1.83710000 | -0.92660000 |
|    | O | 3.85210000  | -1.95610000 | -1.37650000 |
|    | O | 1.71200000  | -2.33800000 | -1.43030000 |
|    | H | 5.57320000  | 0.06120000  | 1.64310000  |
|    | H | 5.34160000  | -0.02780000 | -0.11940000 |
|    | H | 5.47530000  | -1.50560000 | 0.80820000  |
|    | H | -0.11640000 | -1.80860000 | -0.06590000 |
|    | H | -0.46230000 | -1.42060000 | 1.62350000  |
|    | H | -0.68830000 | 0.97870000  | 1.03220000  |
|    | H | -2.28000000 | -2.12340000 | -0.34960000 |
|    | H | -4.69230000 | -2.45590000 | -0.35070000 |
|    | C | -6.66400000 | -0.67830000 | 0.30590000  |
|    | H | -5.26770000 | 1.58440000  | 0.92390000  |
|    | H | -2.84410000 | 1.92720000  | 0.92620000  |
|    | H | -0.40530000 | 0.77930000  | -3.15620000 |
|    | H | -1.52950000 | -0.44330000 | -2.33620000 |

---

---

|   |             |             |             |
|---|-------------|-------------|-------------|
| H | 2.74250000  | 3.21120000  | -0.22720000 |
| H | 1.90990000  | 3.71470000  | 1.27180000  |
| H | 1.39380000  | 4.35730000  | -0.31640000 |
| H | -7.19010000 | 0.15170000  | -0.16690000 |
| H | -6.94150000 | -1.59370000 | -0.21470000 |
| H | -7.03540000 | -0.75510000 | 1.33020000  |

---

[a] Conformers are numbered according to their appearance during conformational search.

#### 4. NMR Data

##### 3a (*R*)-Methyl 4-(3-methyl-4-nitroisoxazol-5-yl)-2-methylene-3-phenylbutanoate (Table 2, entry 1)

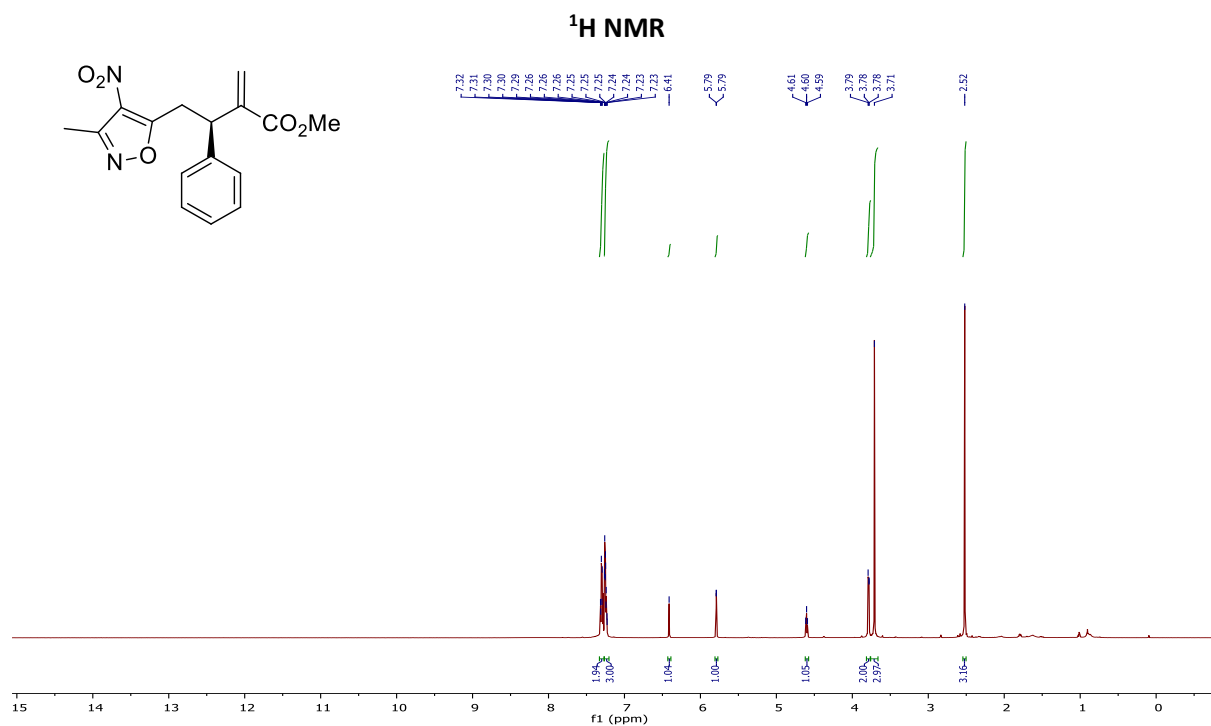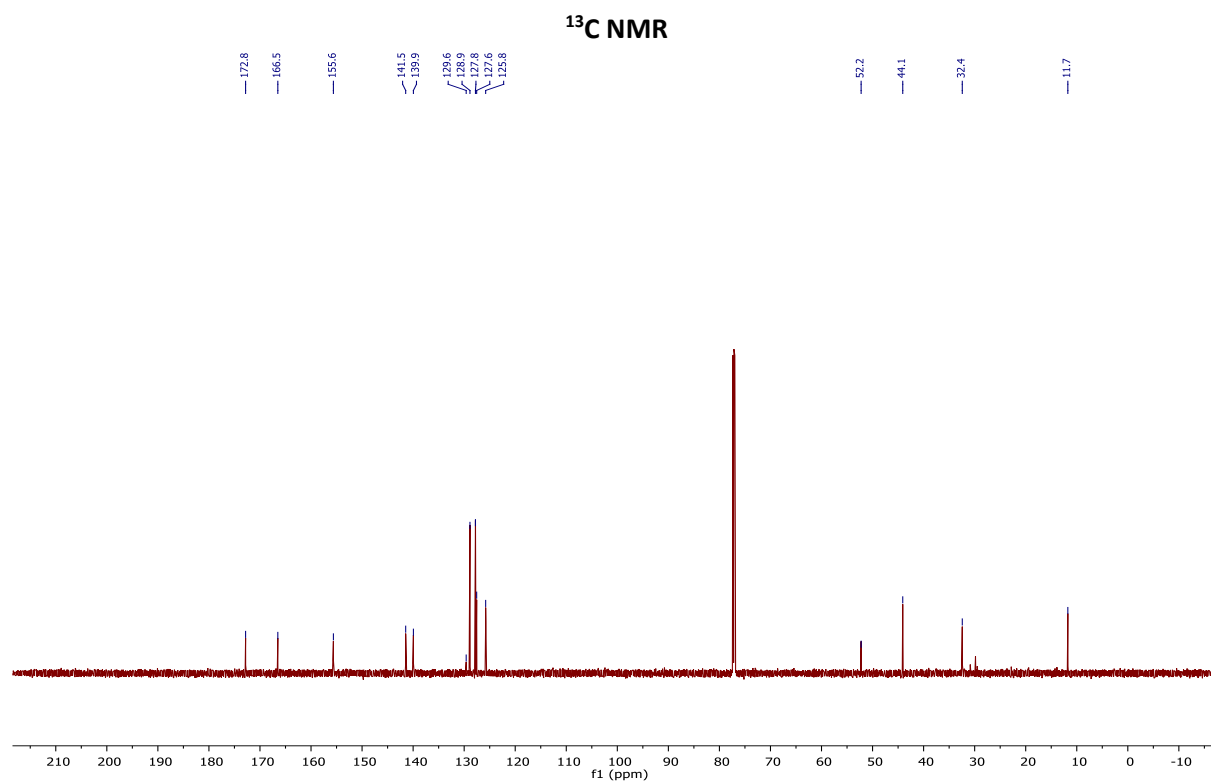

**3b (R)-Methyl 4-(3-methyl-4-nitroisoxazol-5-yl)-2-methylene-3-(4-(trifluoromethyl)phenyl) butanoate (Table 2, entry 2)**

**<sup>1</sup>H NMR**

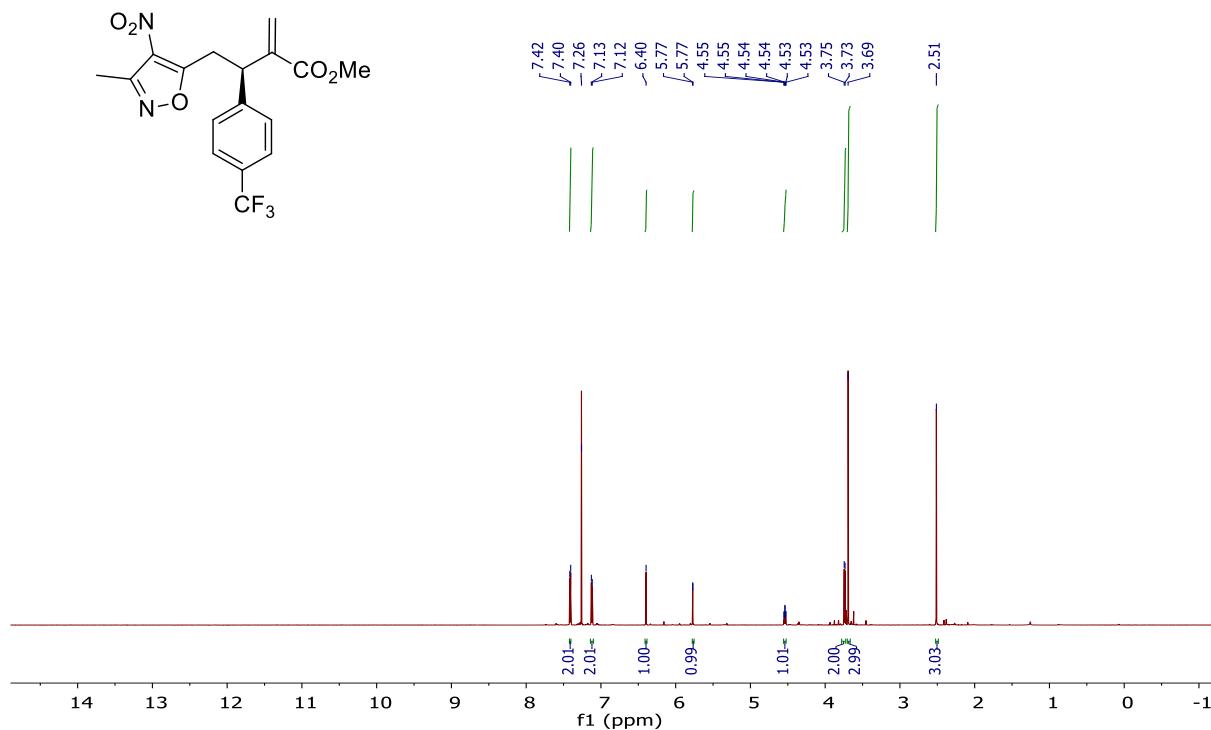

**<sup>13</sup>C NMR**

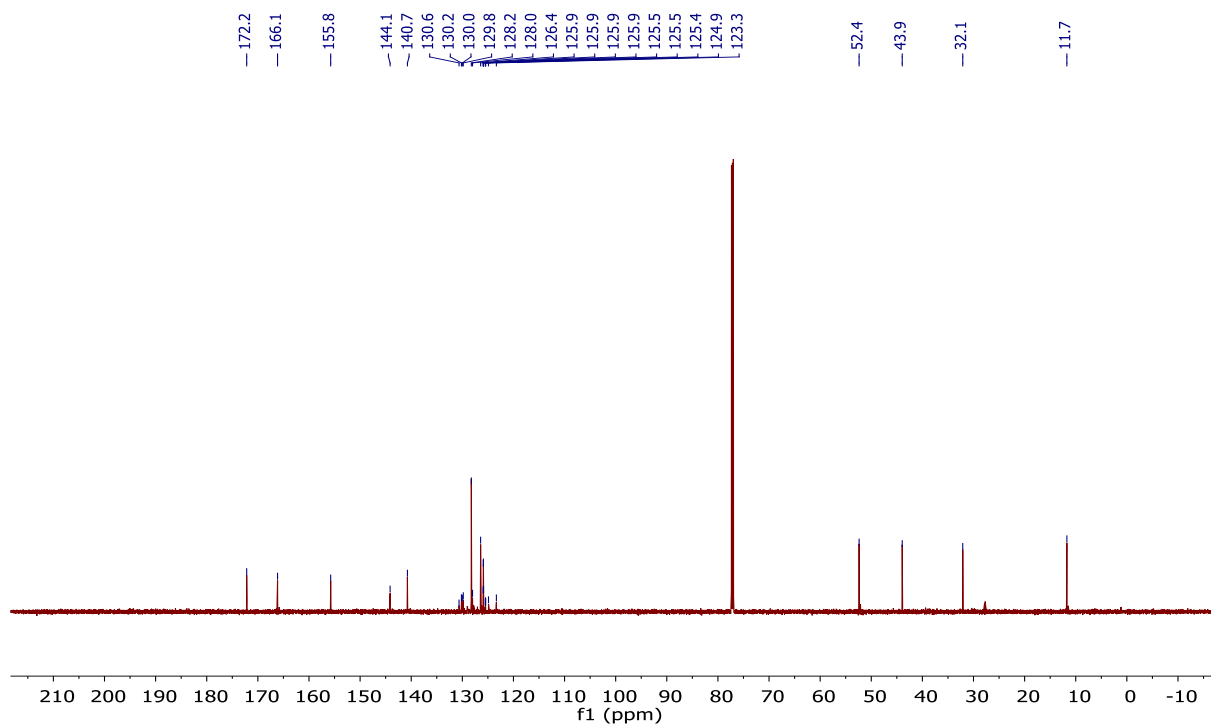

**3c (R)-Methyl 3-(4-bromophenyl)-4-(3-methyl-4-nitroisoxazol-5-yl)-2-methylenebutanoate (Table 2, entry 3)**

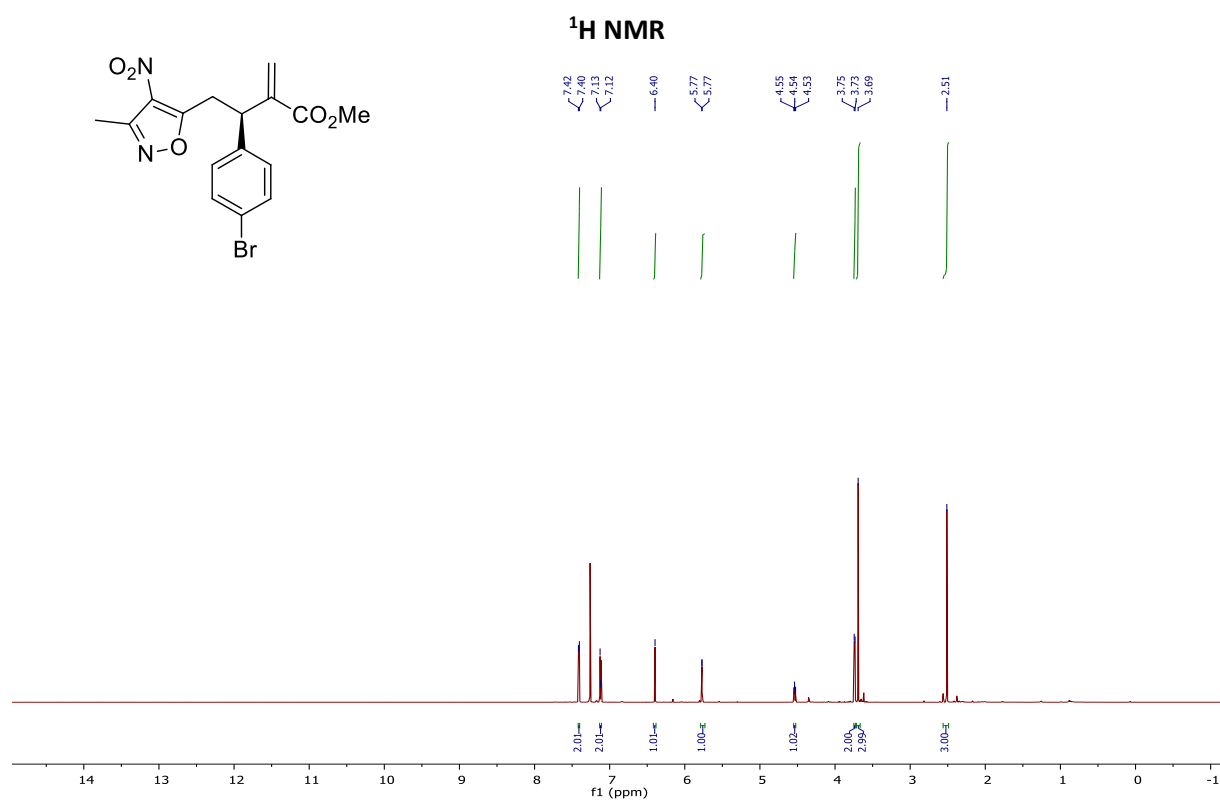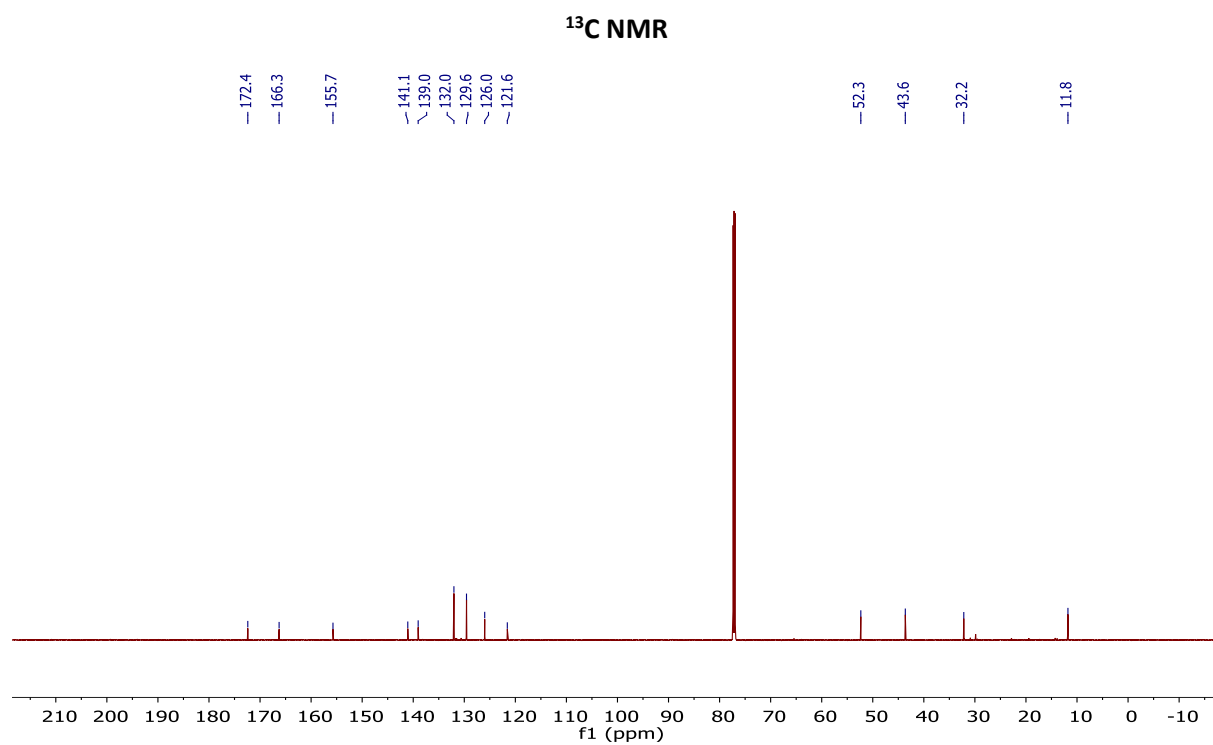

**3d (R)-Methyl 3-(4-chlorophenyl)-4-(3-methyl-4-nitroisoxazol-5-yl)-2-methylenebutanoate (Table 2, entry 4)**

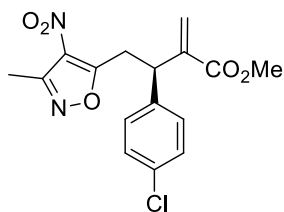

**<sup>1</sup>H NMR**

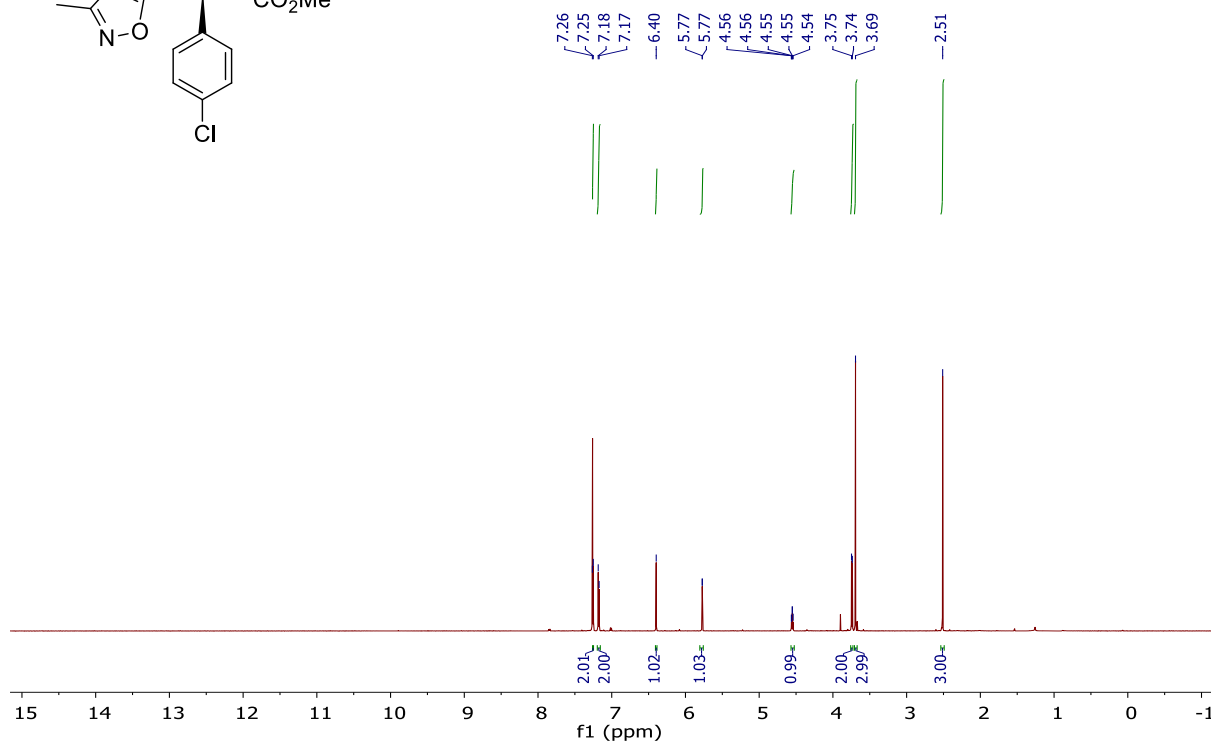

**<sup>13</sup>C NMR**

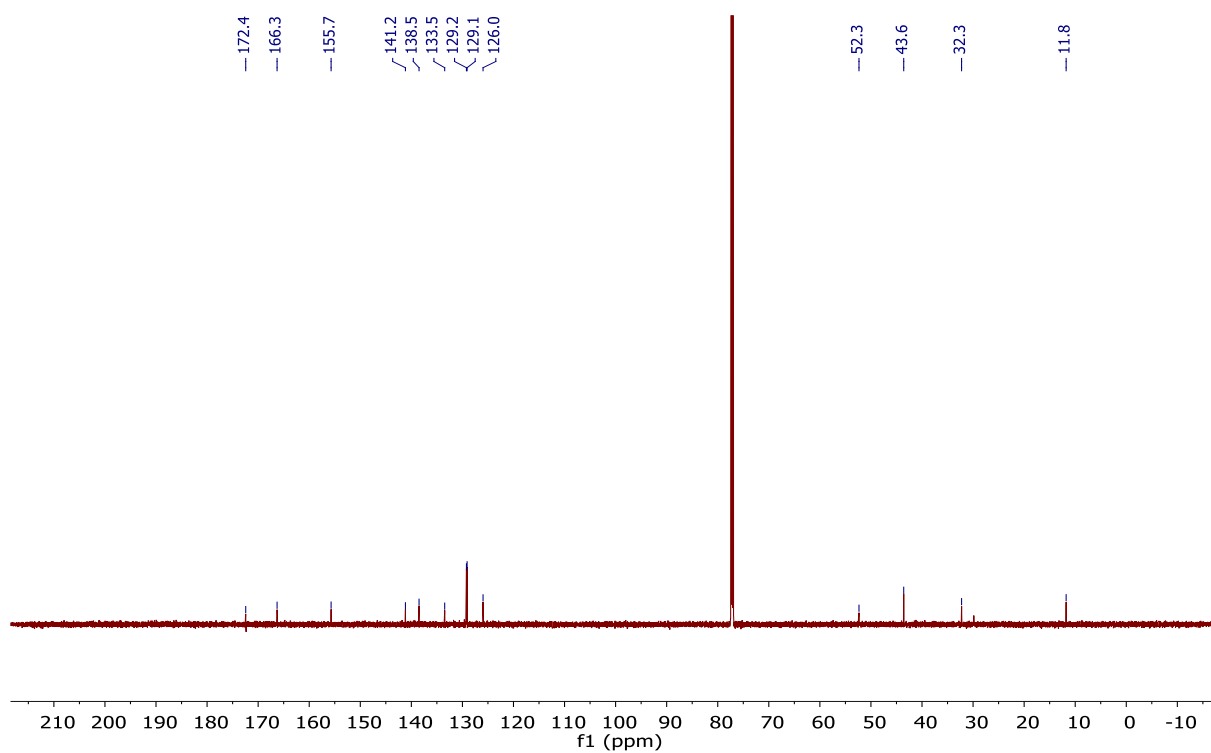

**3e (R)-Methyl 3-(3-chlorophenyl)-4-(3-methyl-4-nitroisoxazol-5-yl)-2-methylenebutanoate (Table 2, entry 5)**

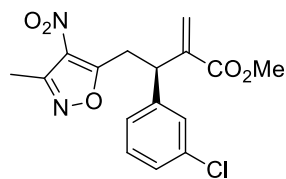

**<sup>1</sup>H NMR**

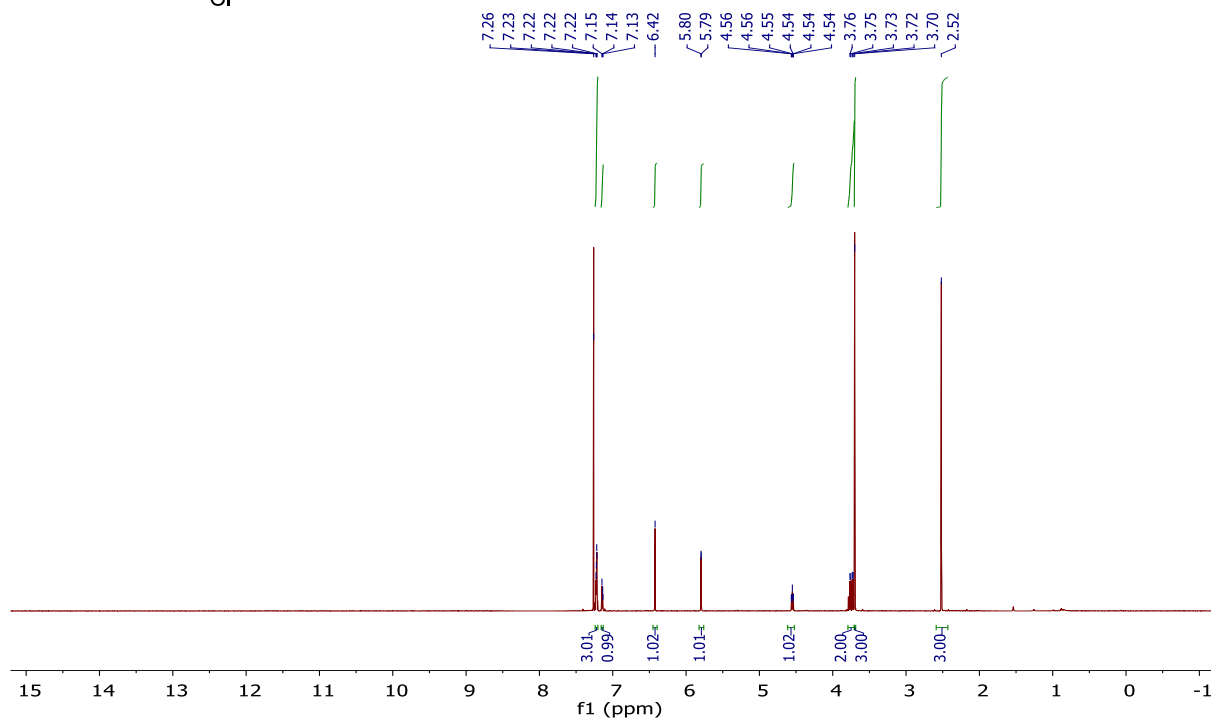

**<sup>13</sup>C NMR**

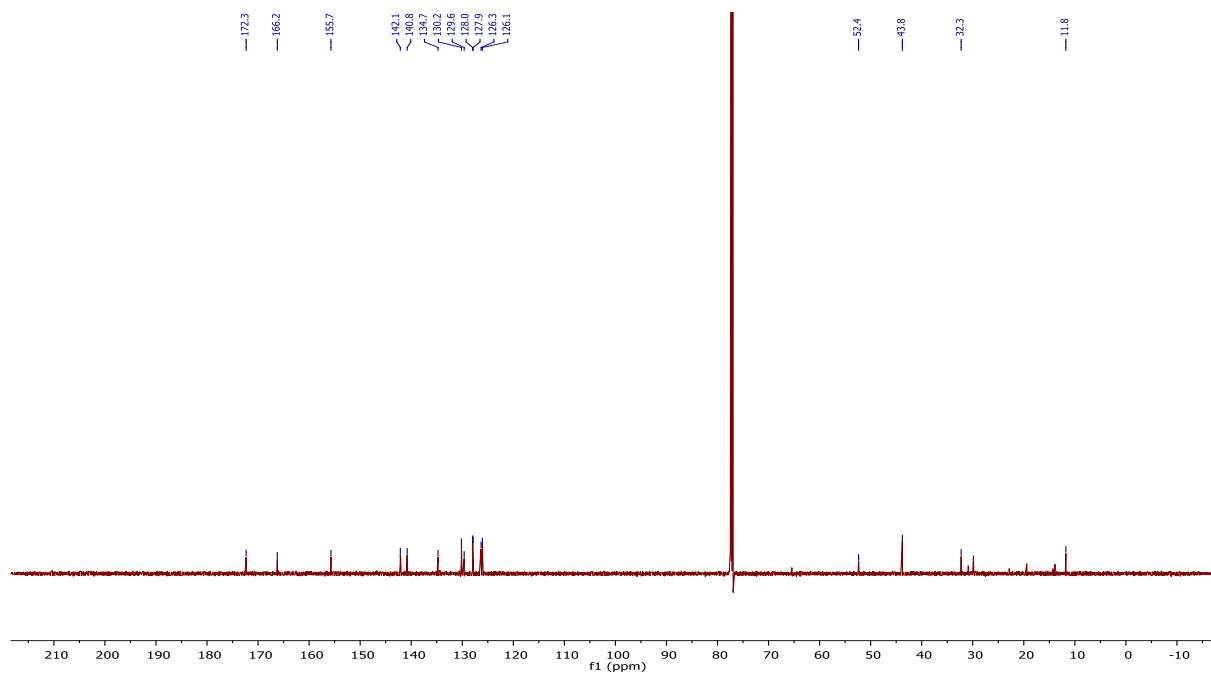

**3f (S)-Methyl 3-(2-chlorophenyl)-4-(3-methyl-4-nitroisoxazol-5-yl)-2-methylenebutanoate (Table 2, entry 6)**

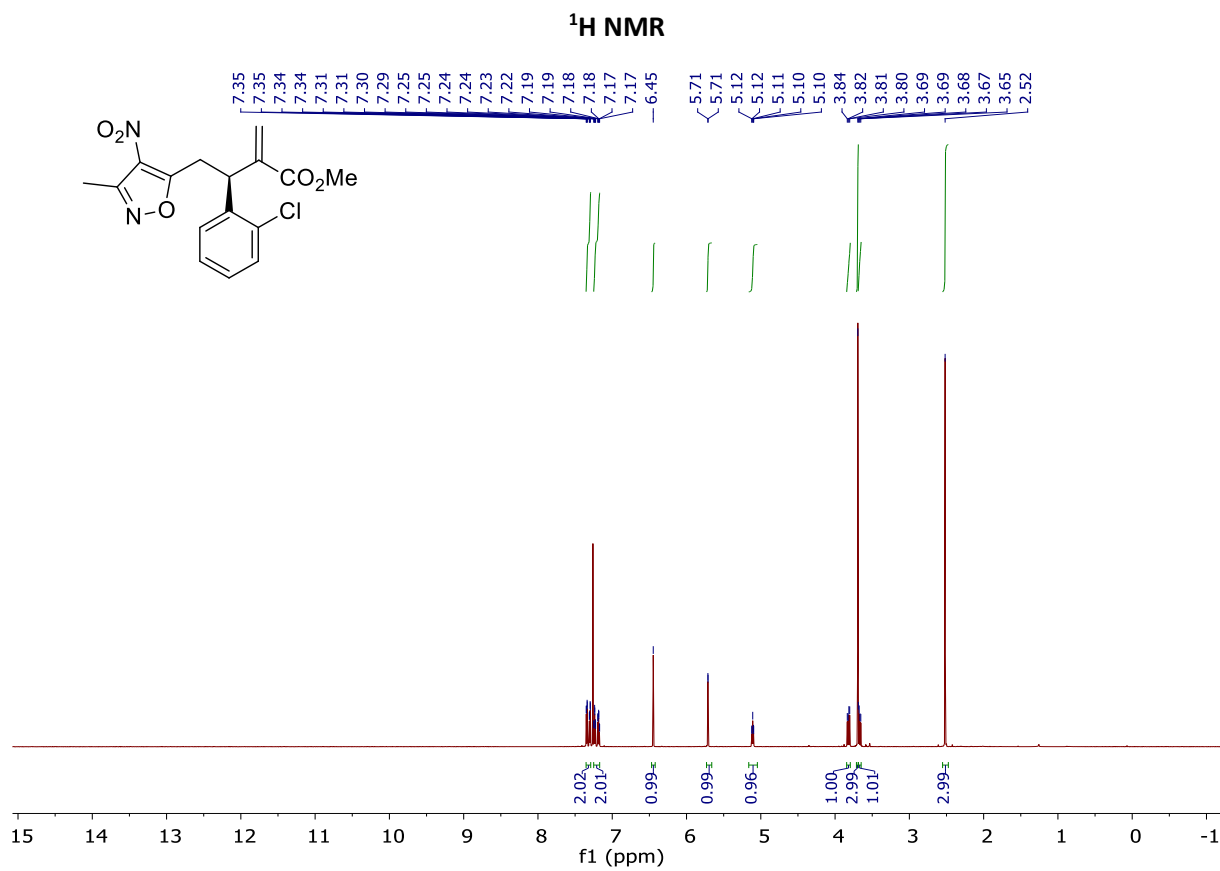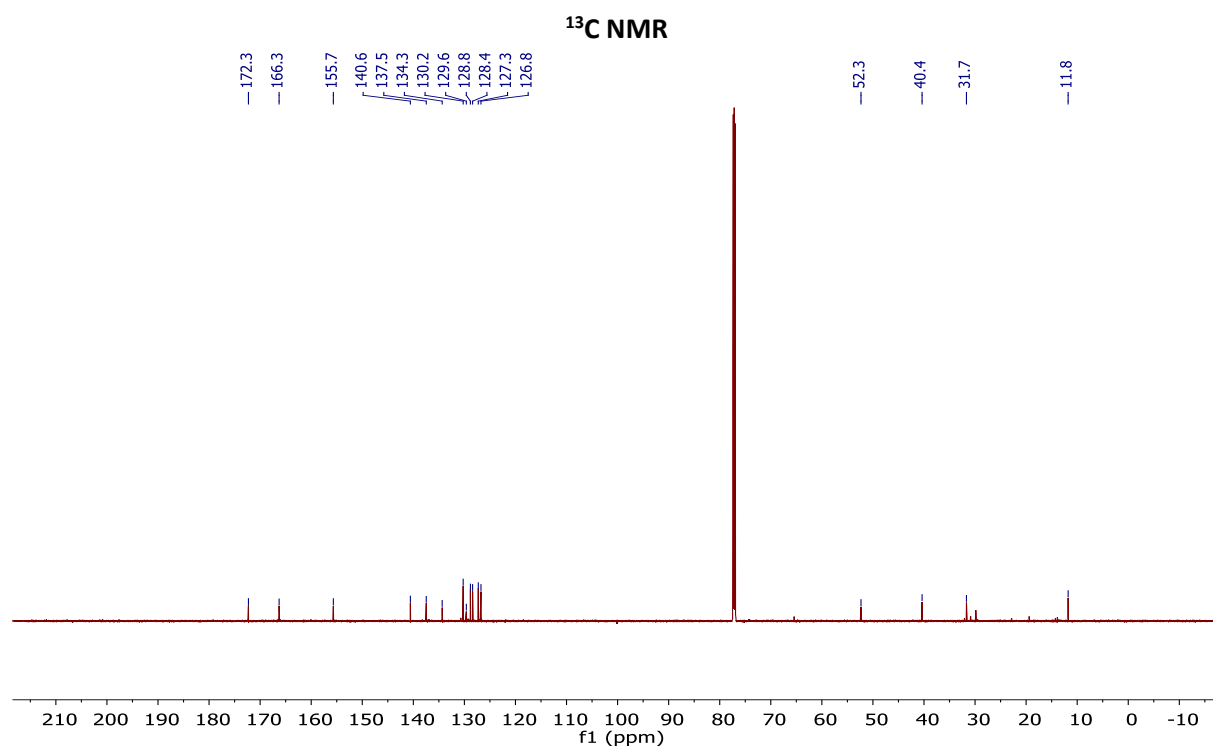



3g (*R*)-Methyl 4-(3-methyl-4-nitroisoxazol-5-yl)-2-methylene-3-(*p*-tolyl)butanoate (Table 2, entry 7)

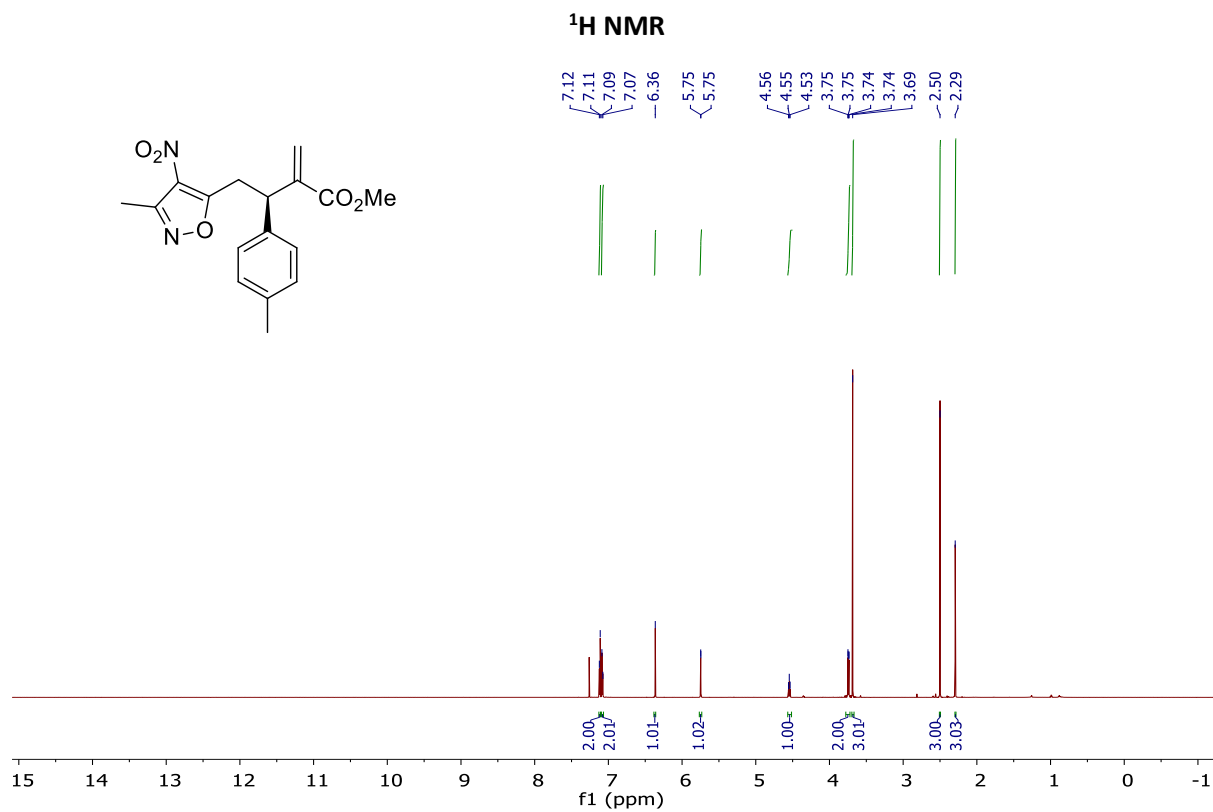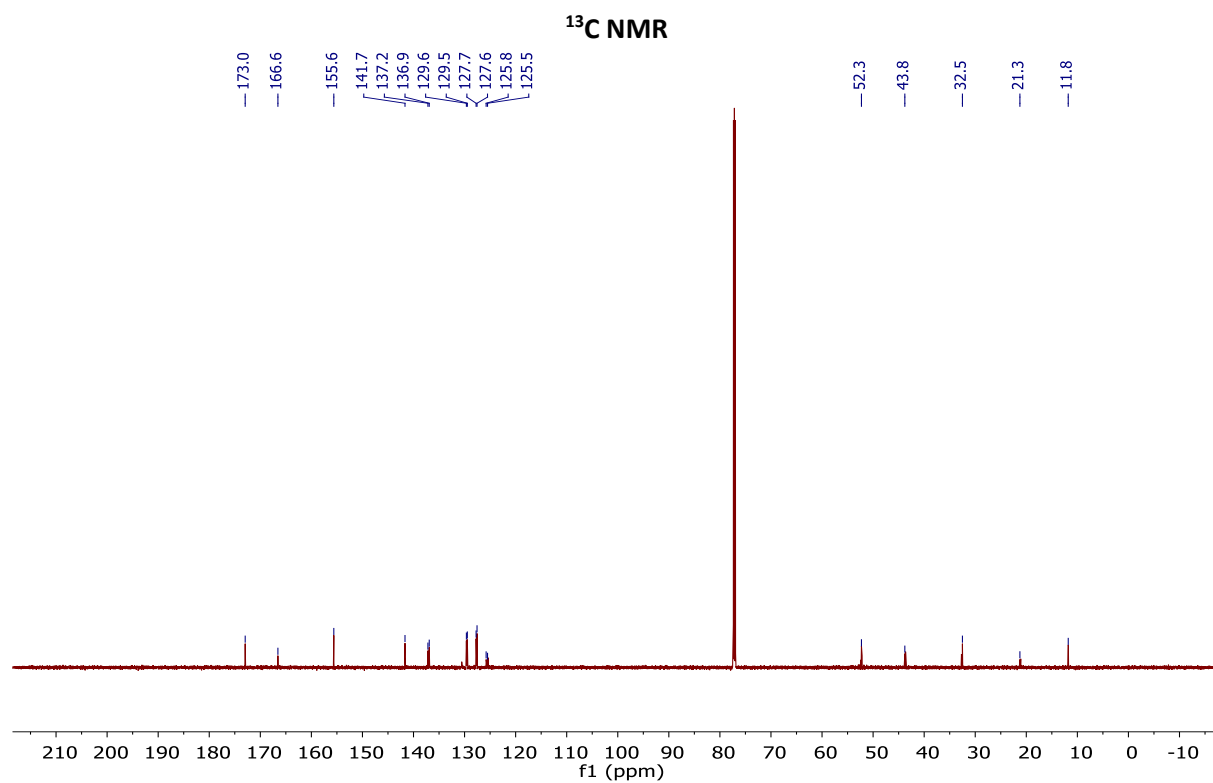

**3h (R)-Methyl 3-(4-methoxyphenyl)-4-(3-methyl-4-nitroisoxazol-5-yl)-2-methylenebutanoate (Table 2, entry 8)**

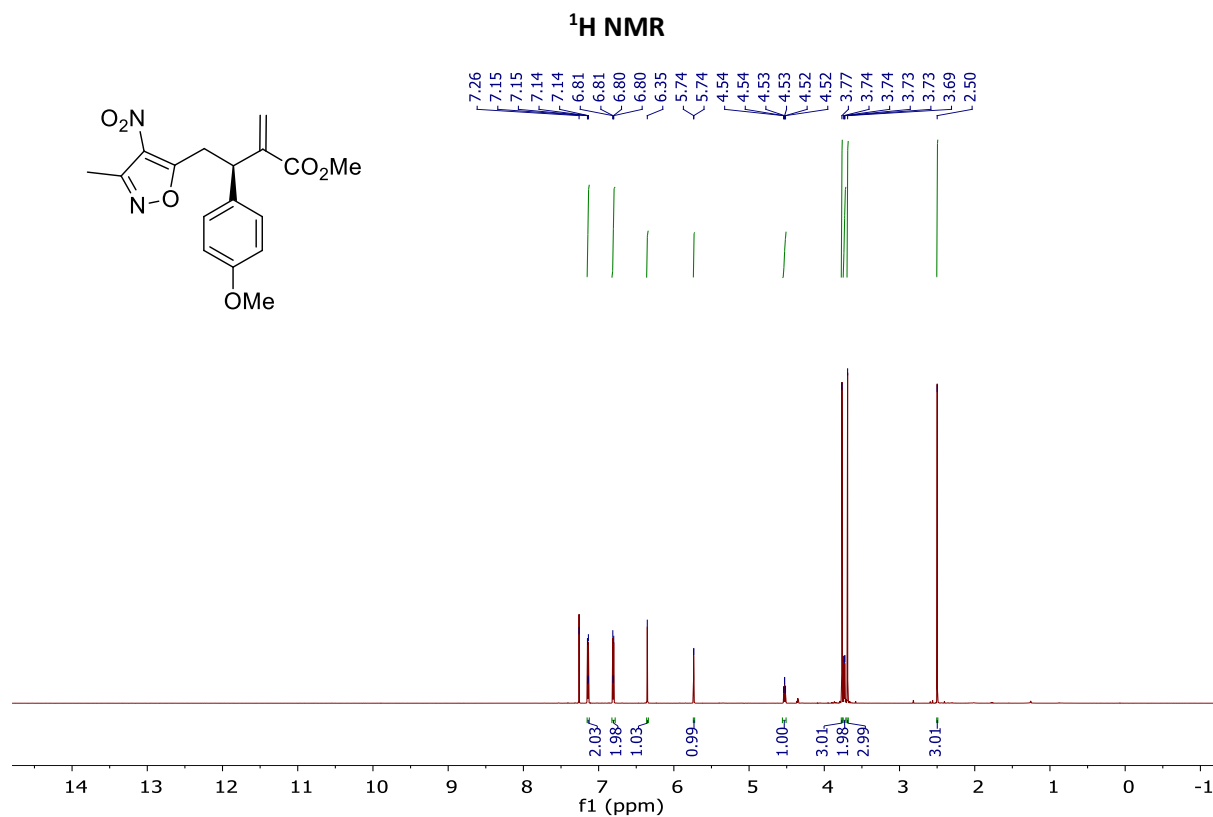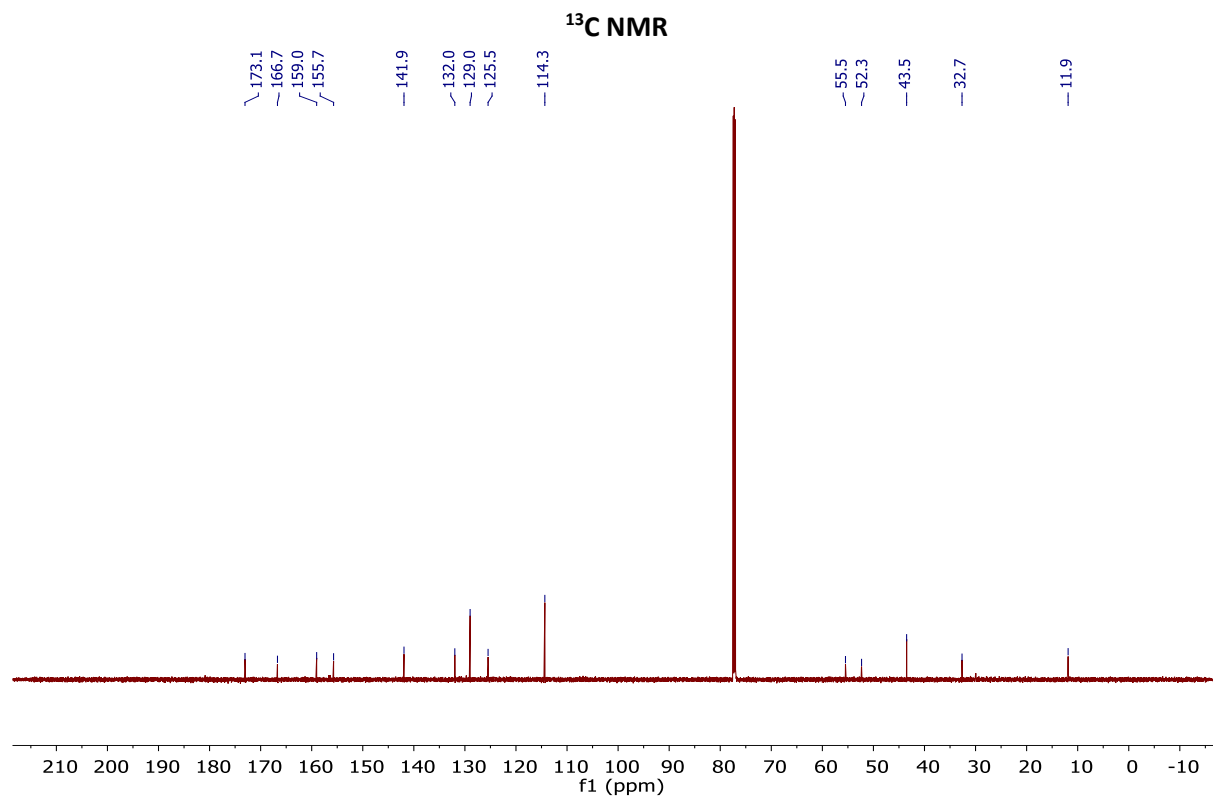

3i (*R*)-Methyl 3-(benzo[d][1,3]dioxol-5-yl)-4-(3-methyl-4-nitroisoxazol-5-yl)-2-methylenebutanoate  
(Table 2, entry 9)

<sup>1</sup>H NMR

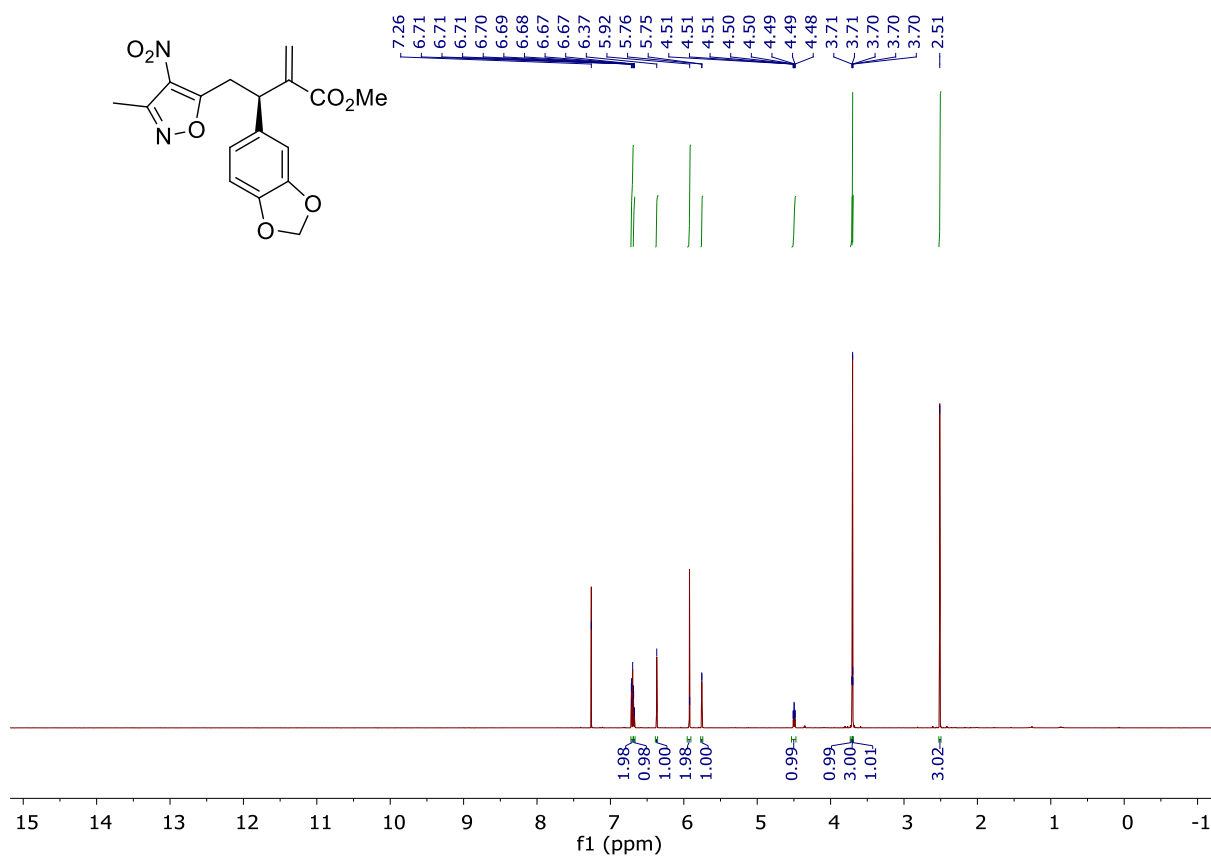

<sup>13</sup>C NMR

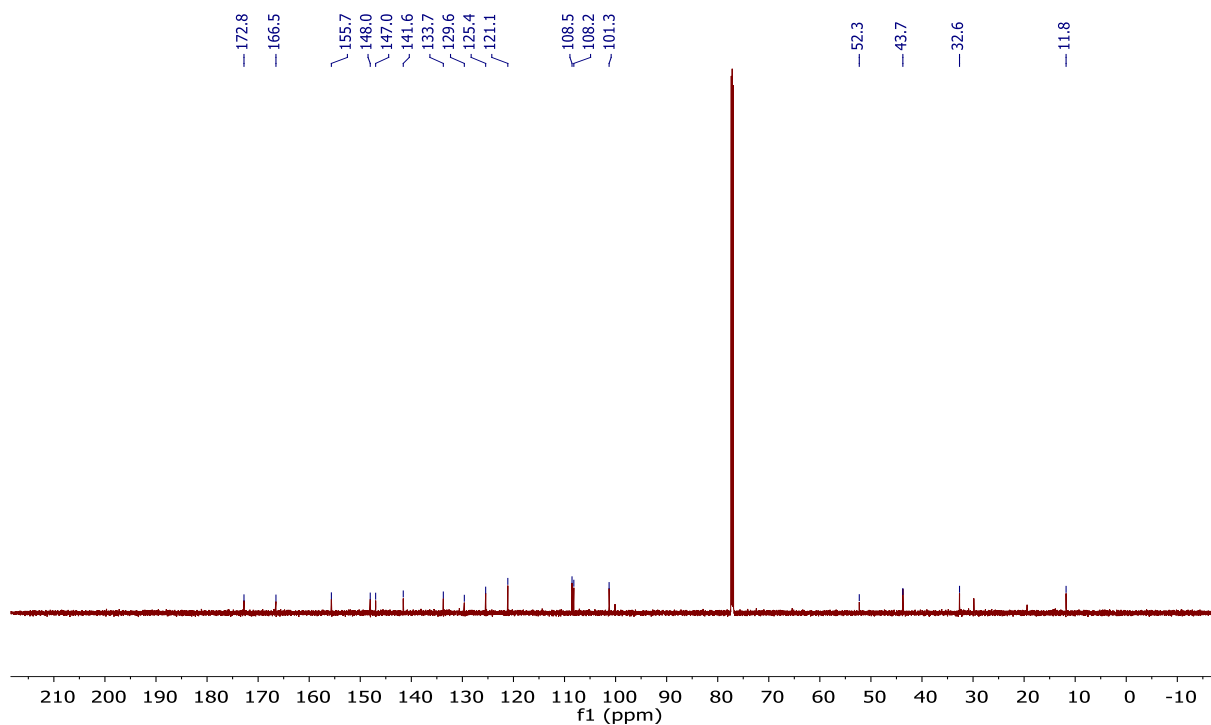

**3j (S)-Methyl 3-(furan-2-yl)-4-(3-methyl-4-nitroisoxazol-5-yl)-2-methylenebutanoate (Table 2, entry 10)**

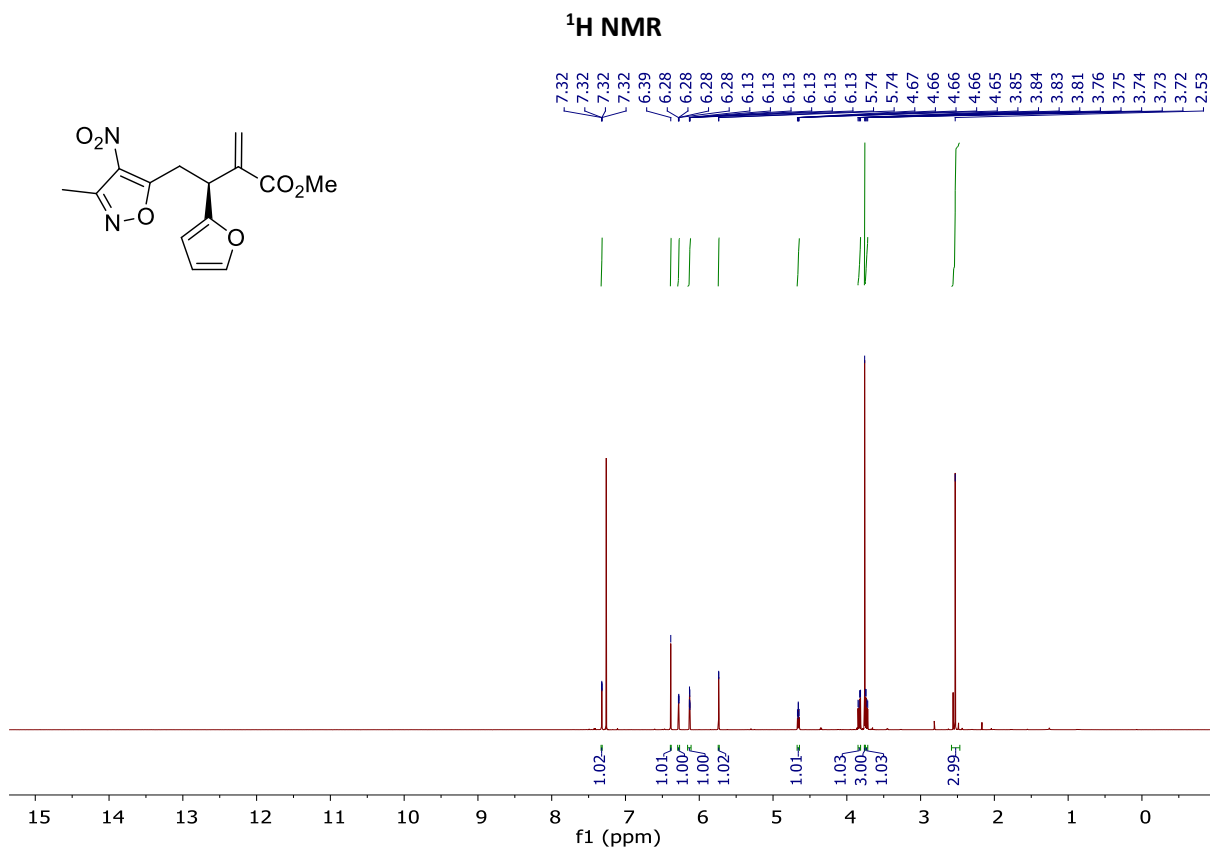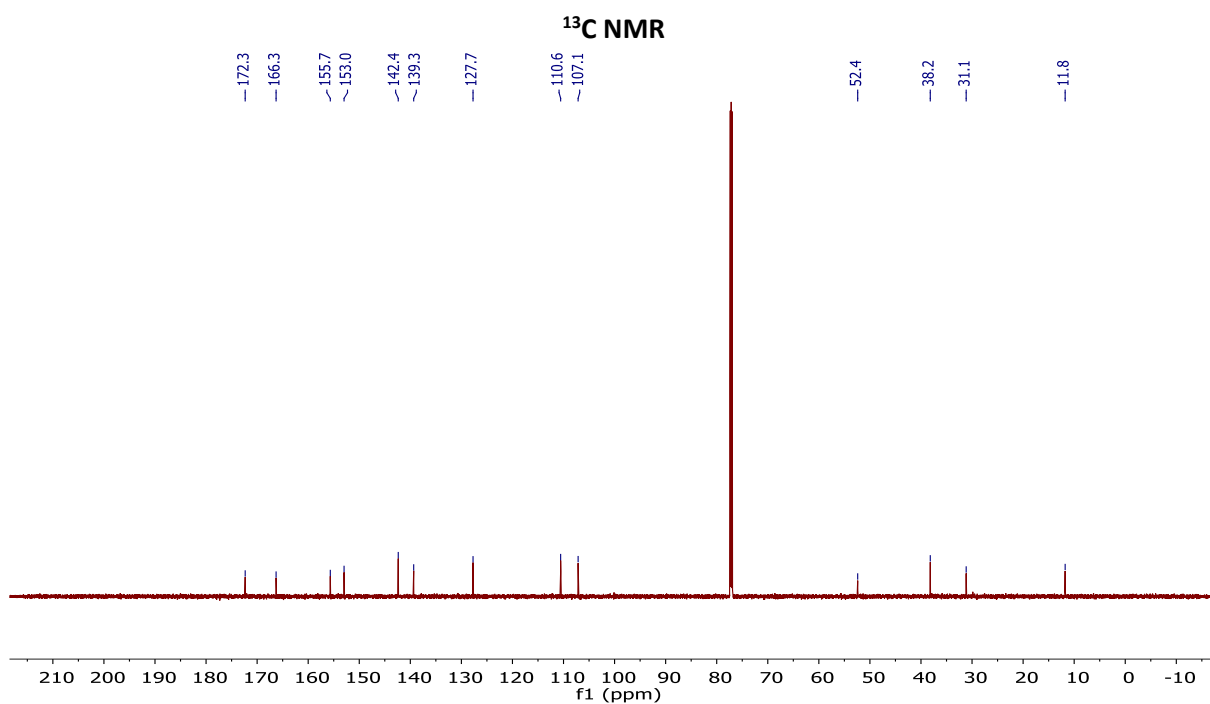

**3k (*R,E*)-Methyl 3-((3-methyl-4-nitroisoxazol-5-yl)methyl)-2-methylenehex-4-enoate (Table 2, entry 11)**

**<sup>1</sup>H NMR**

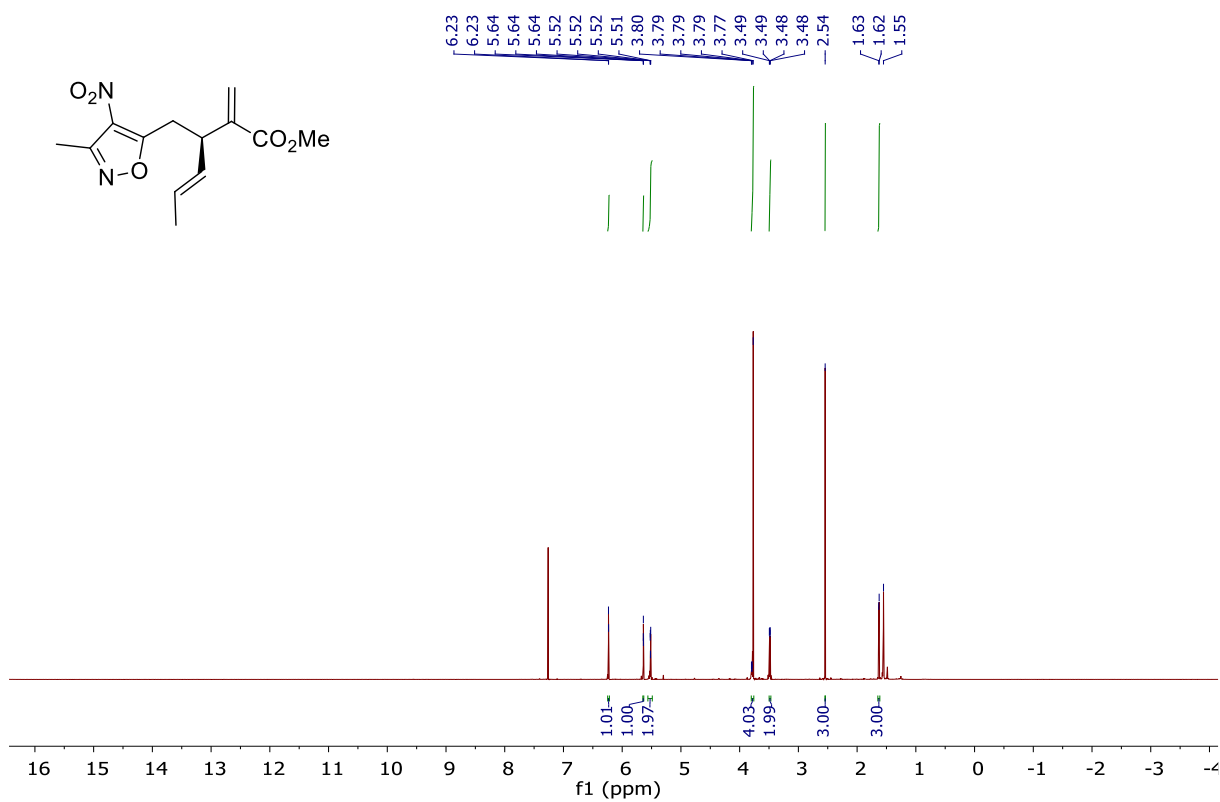

**<sup>13</sup>C NMR**

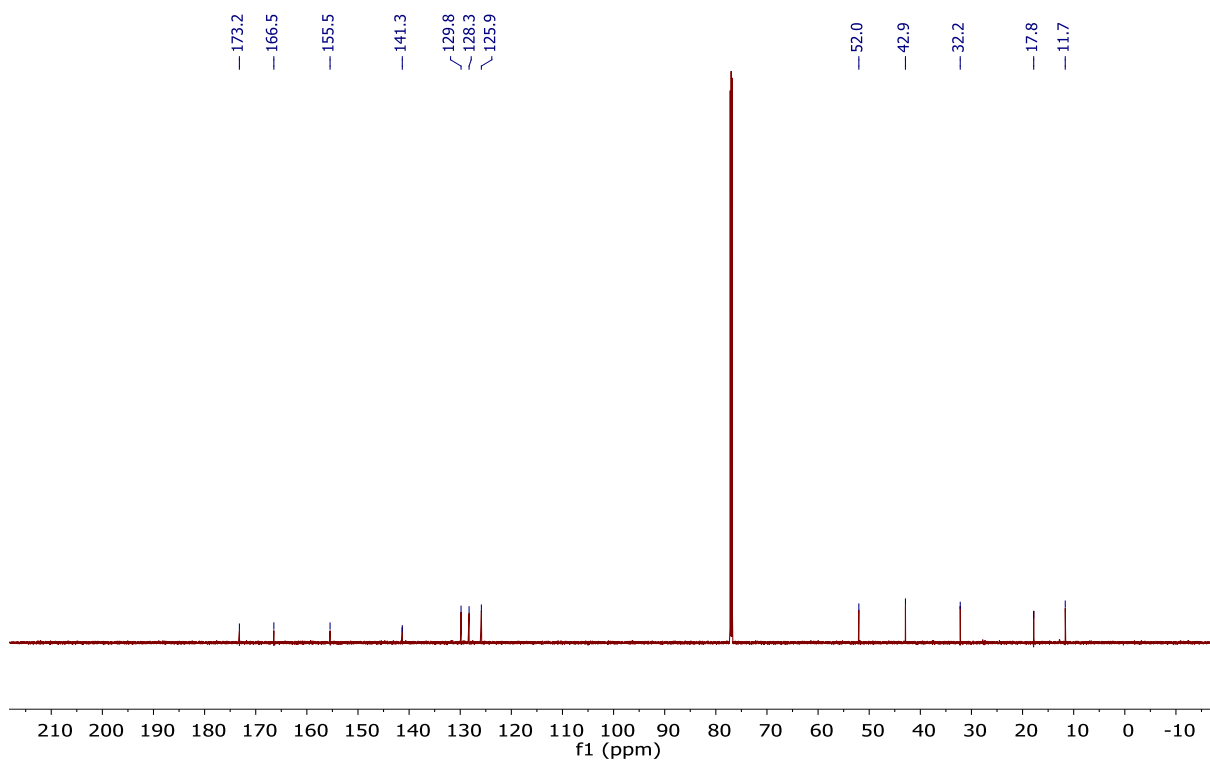

3I (R)-Ethyl 4-(3-methyl-4-nitroisoxazol-5-yl)-2-methylene-3-phenylbutanoate (Table 2, entry 12)

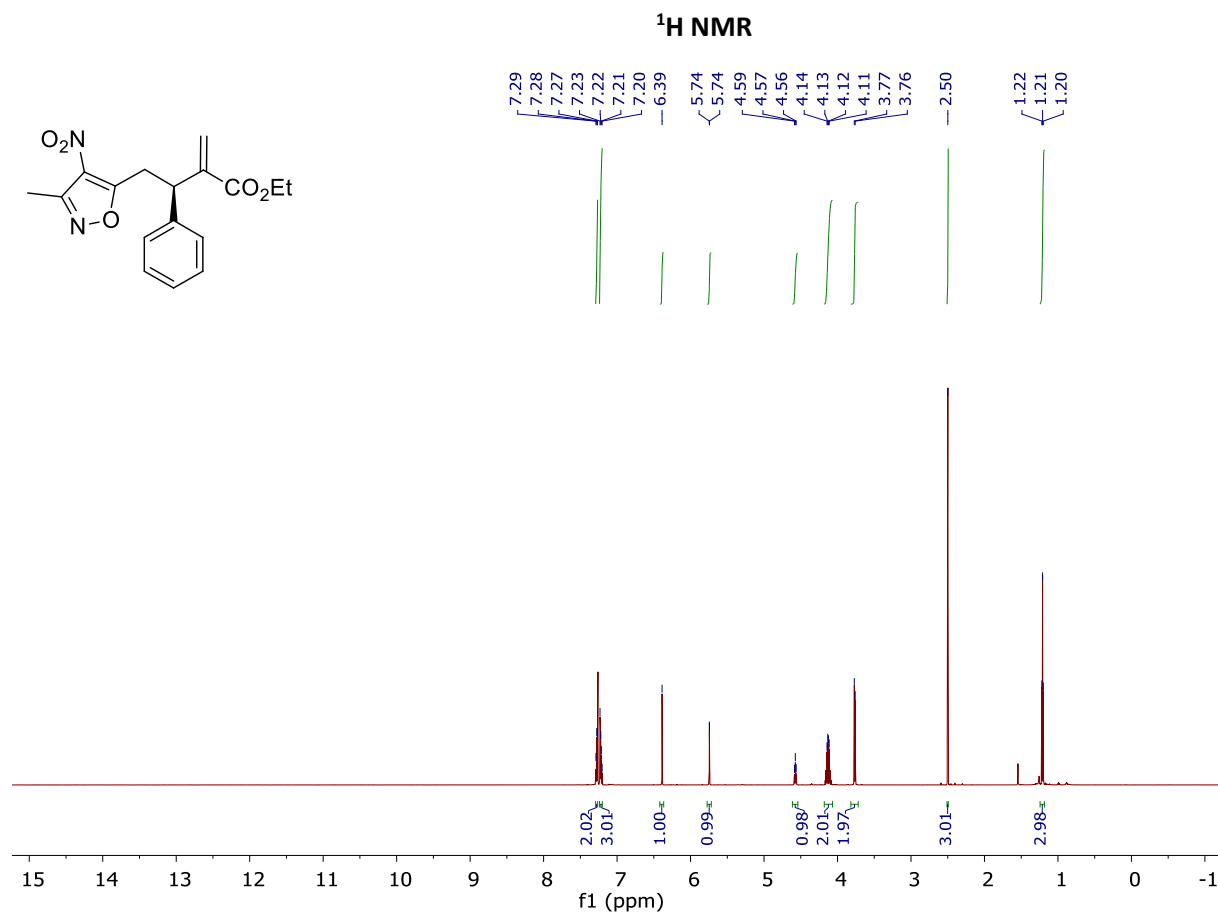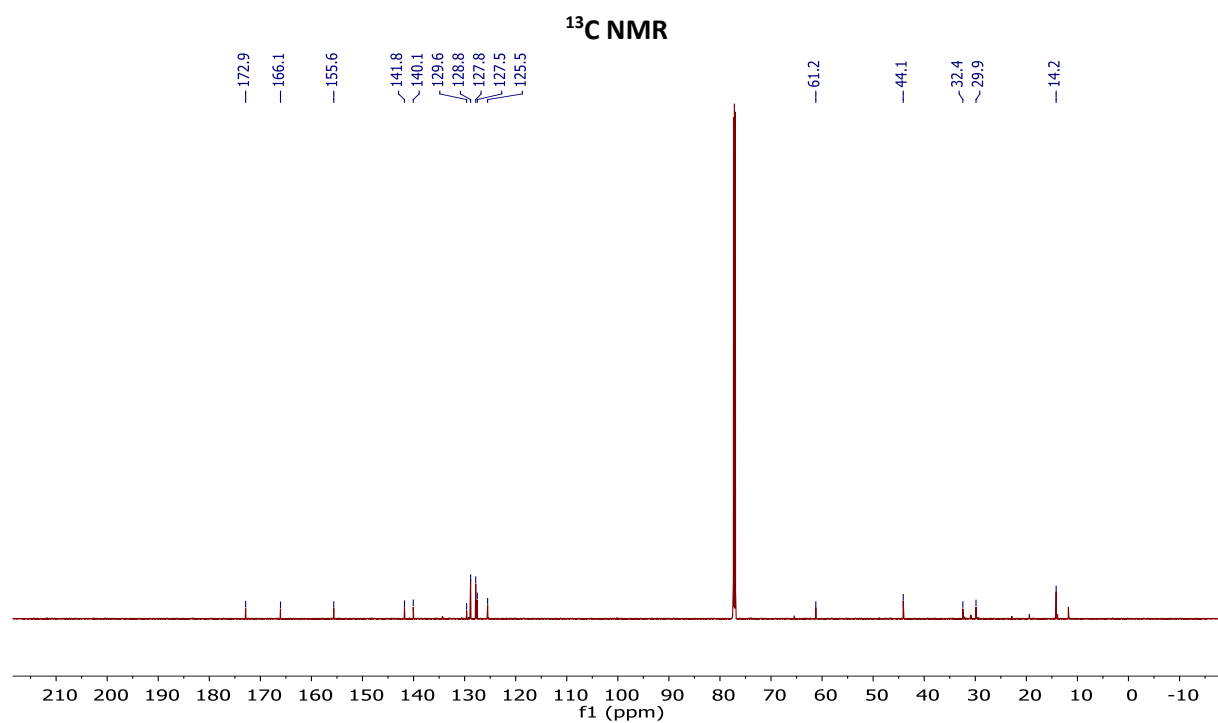

**3m (R)-tert-Butyl 4-(3-methyl-4-nitroisoxazol-5-yl)-2-methylene-3-phenylbutanoate (Table 2, entry 13)**

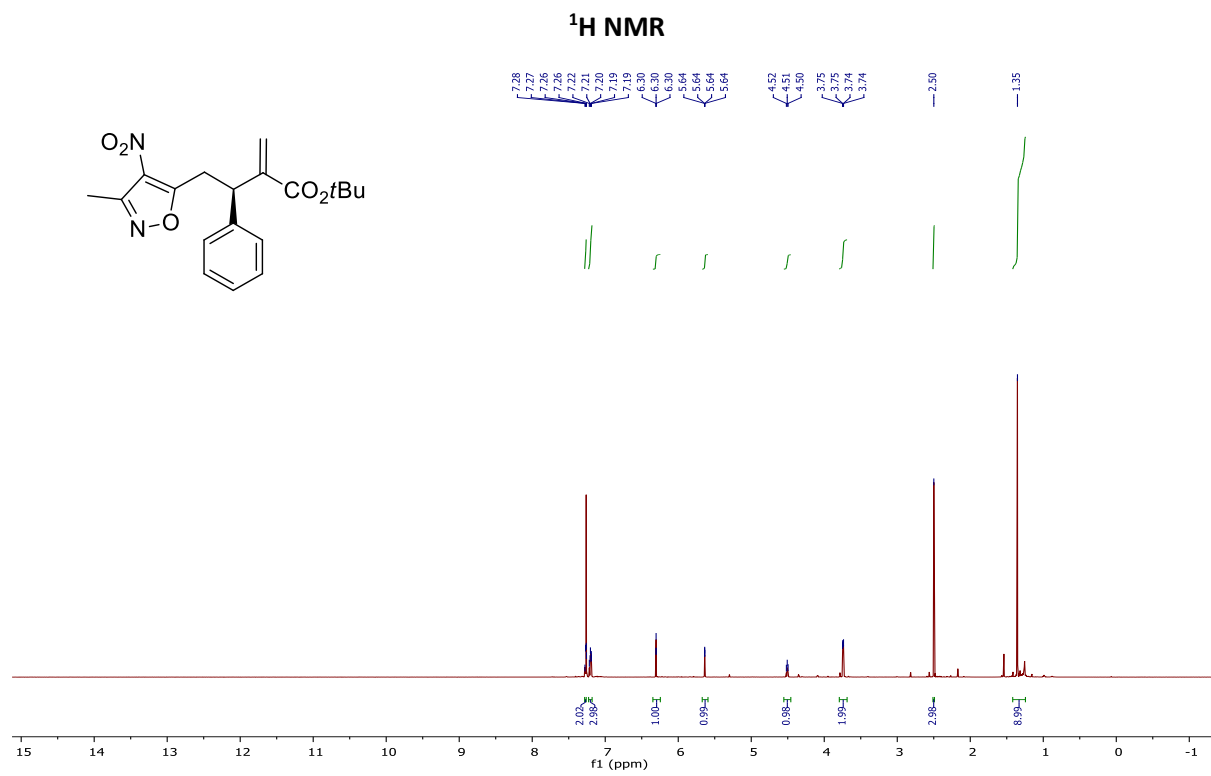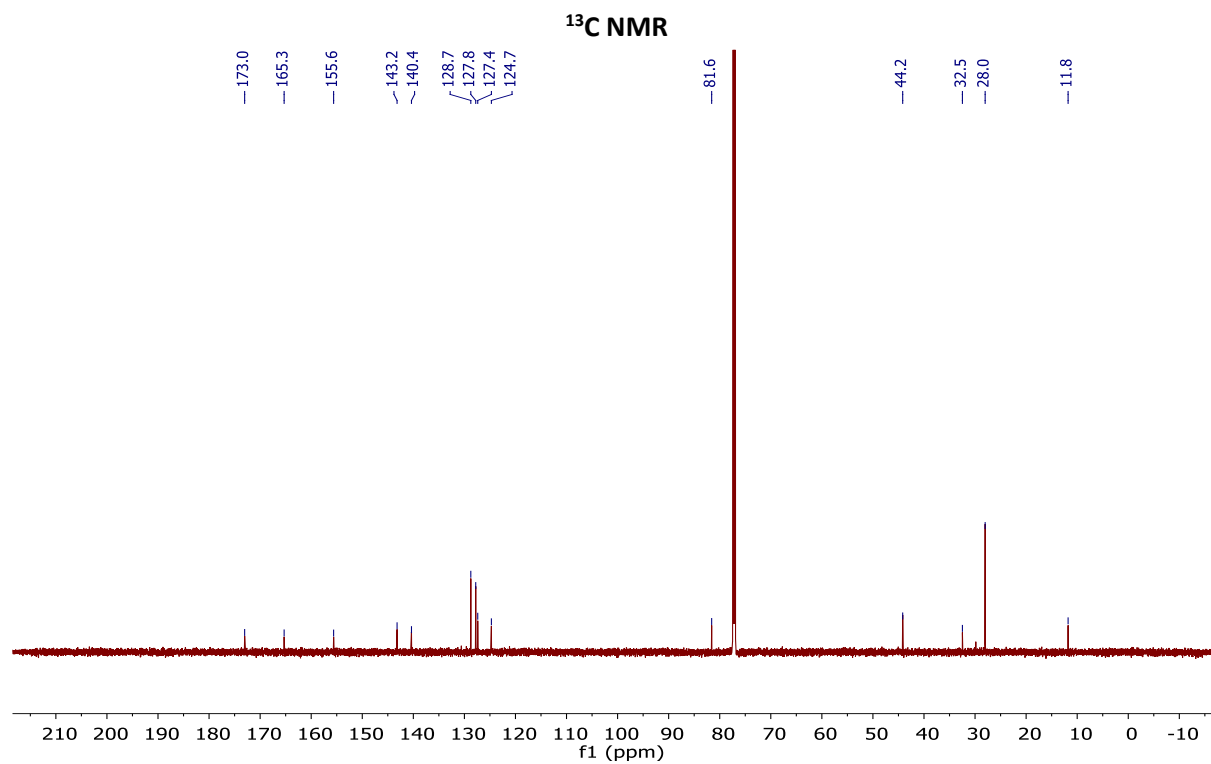

4a (*R*)-Dimethyl 2-methylene-3-phenylpentanedioate (Scheme 3)

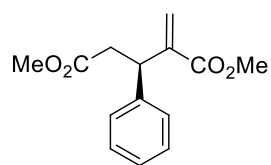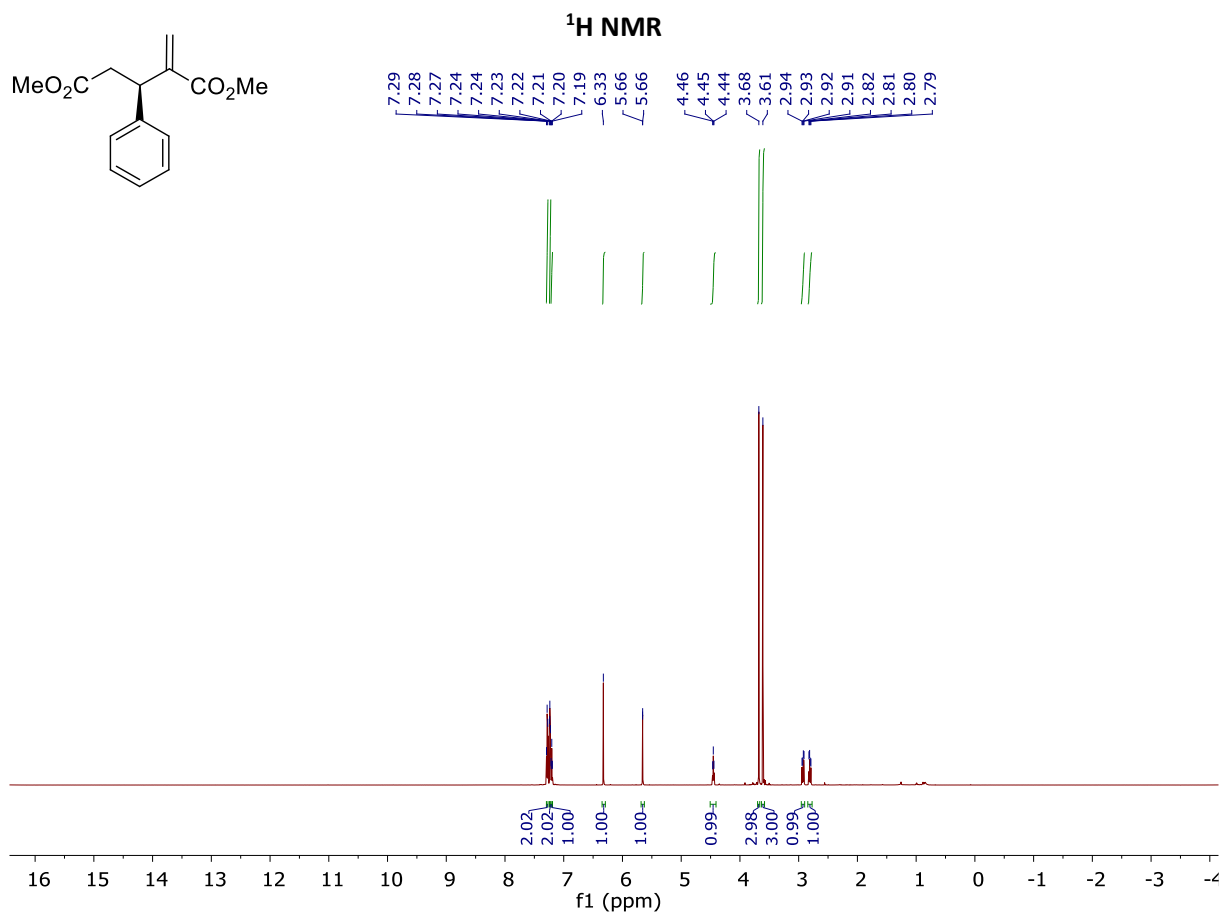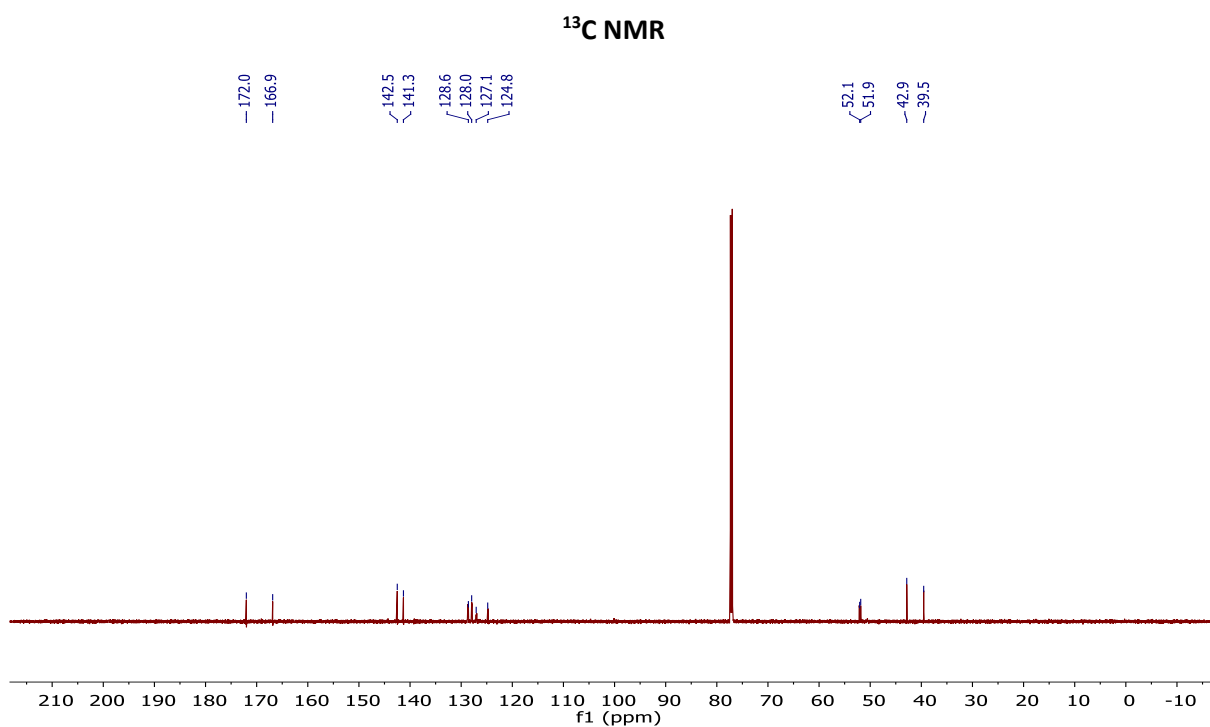



6a (*R*)-Methyl 4-(4-amino-3-methylisoxazol-5-yl)-2-methylene-3-phenylbutanoate (Scheme 3)

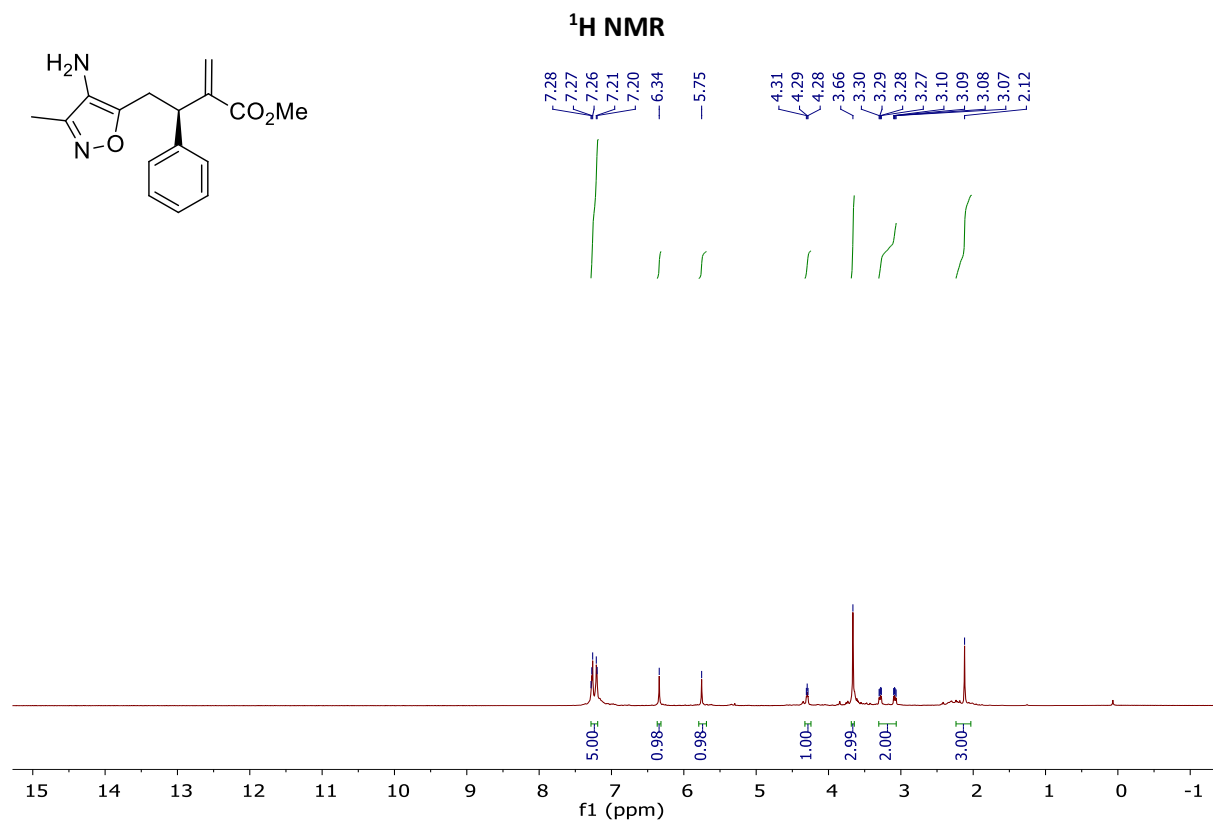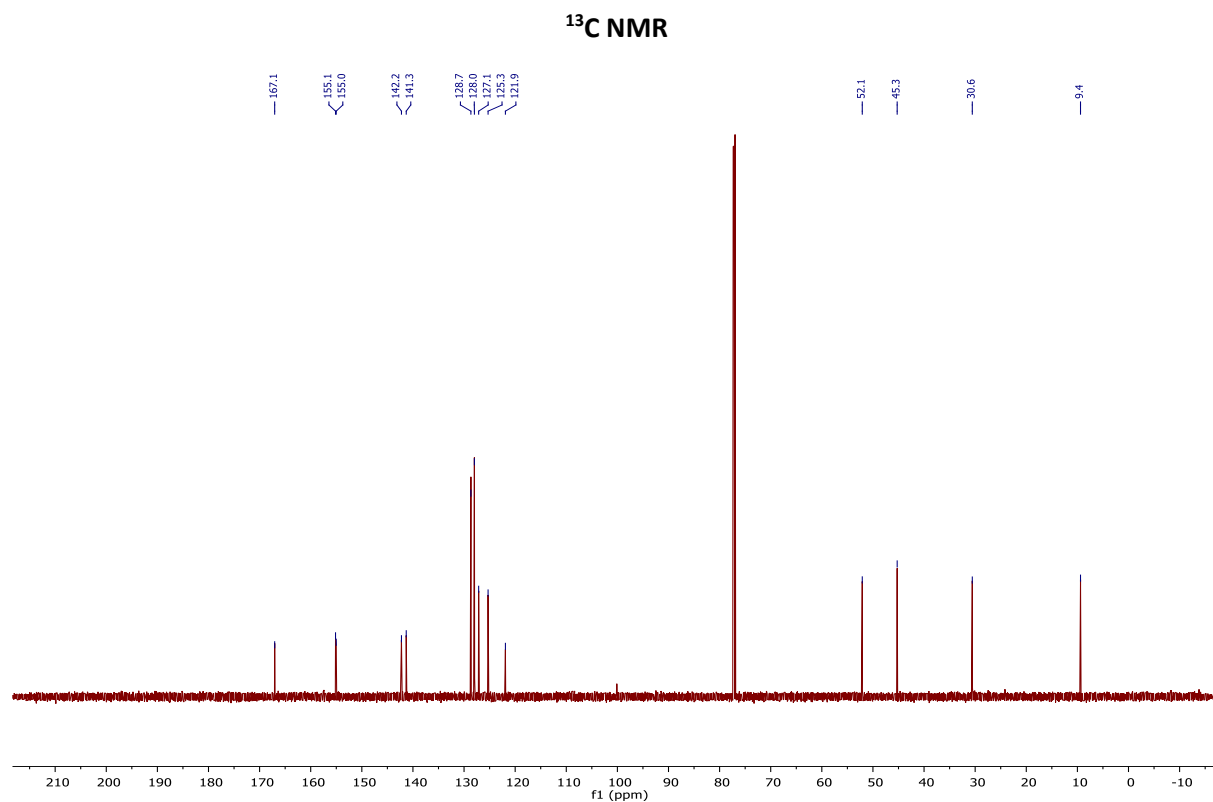

### 3n (R)-Methyl 2-(1-methyl-3-((3-methyl-4-nitroisoxazol-5-yl)methyl)-2-oxindolin-3-yl)acrylate

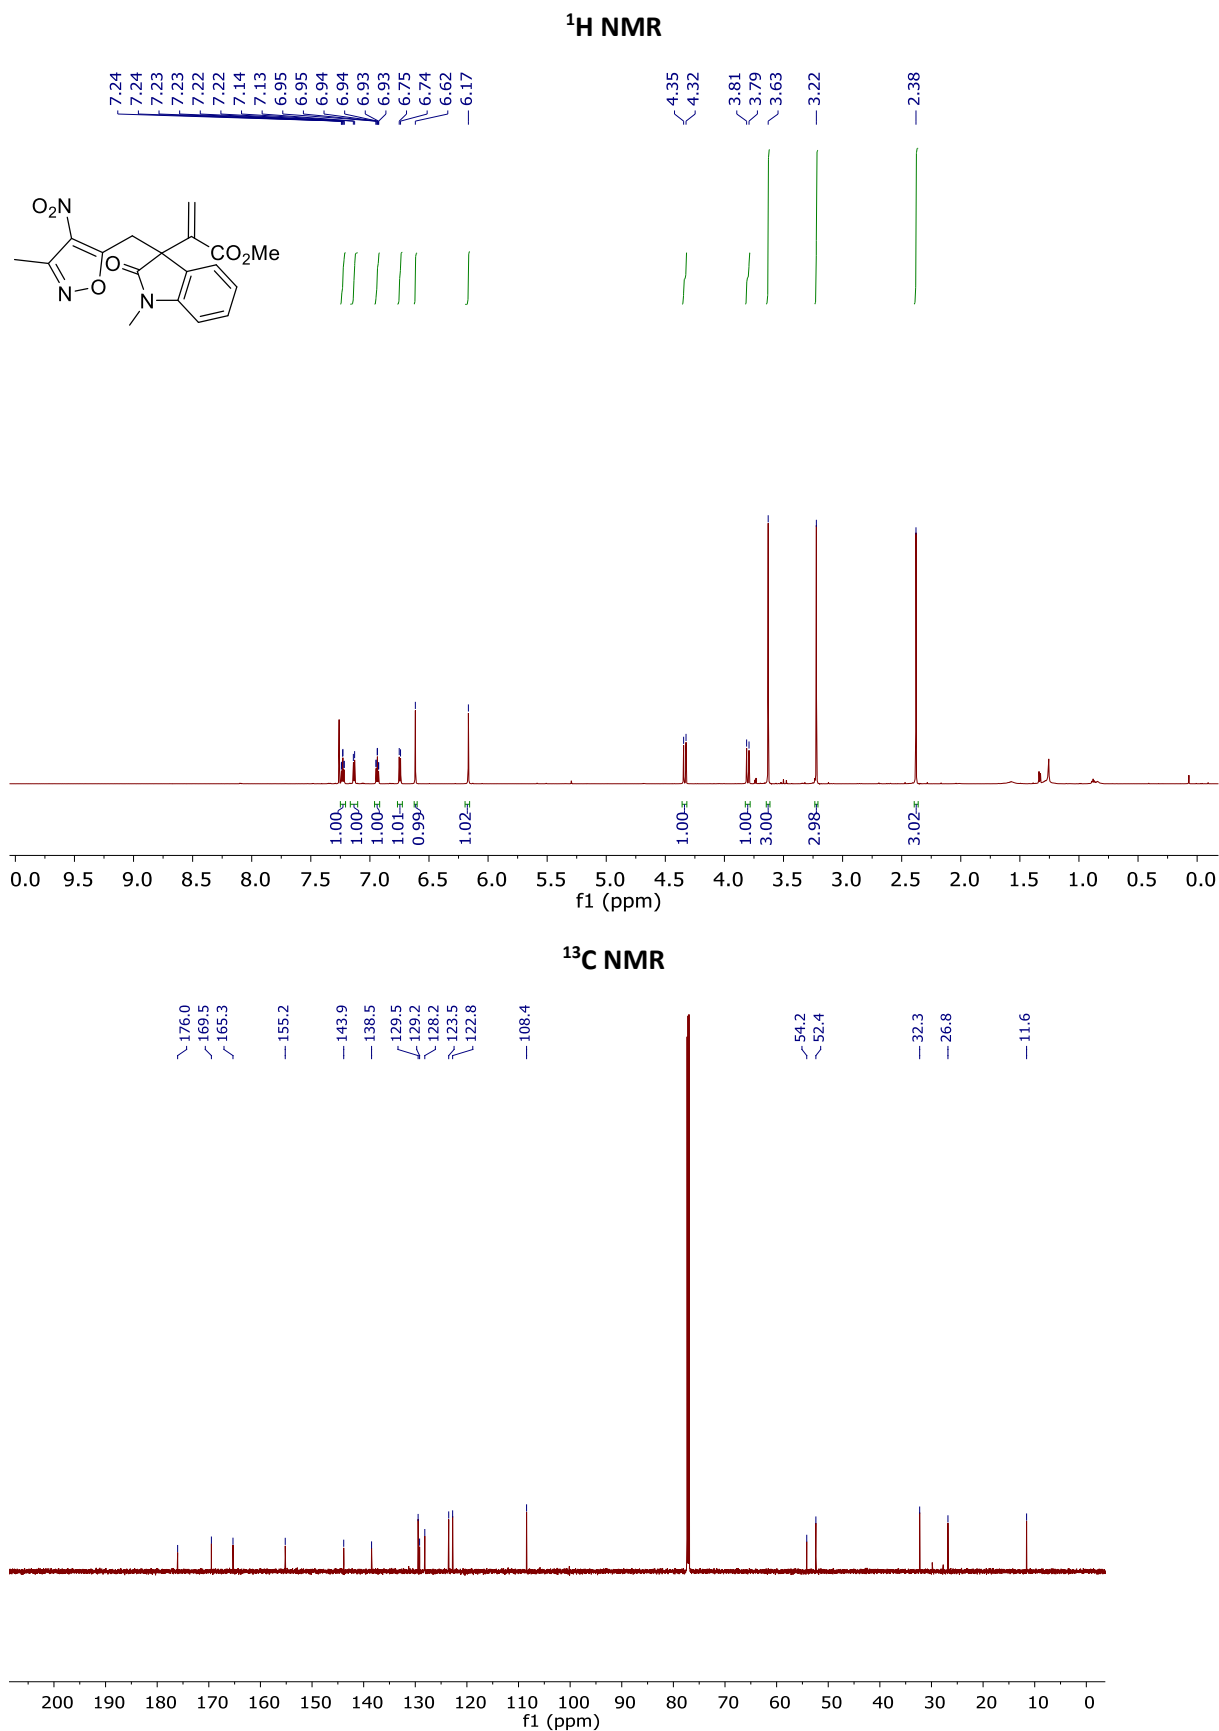

**3o Methyl 2-((R)-3-((S)-1-(3-ethyl-4-nitroisoxazol-5-yl)ethyl)-1-methyl-2-oxindolin-3-yl)acrylate**

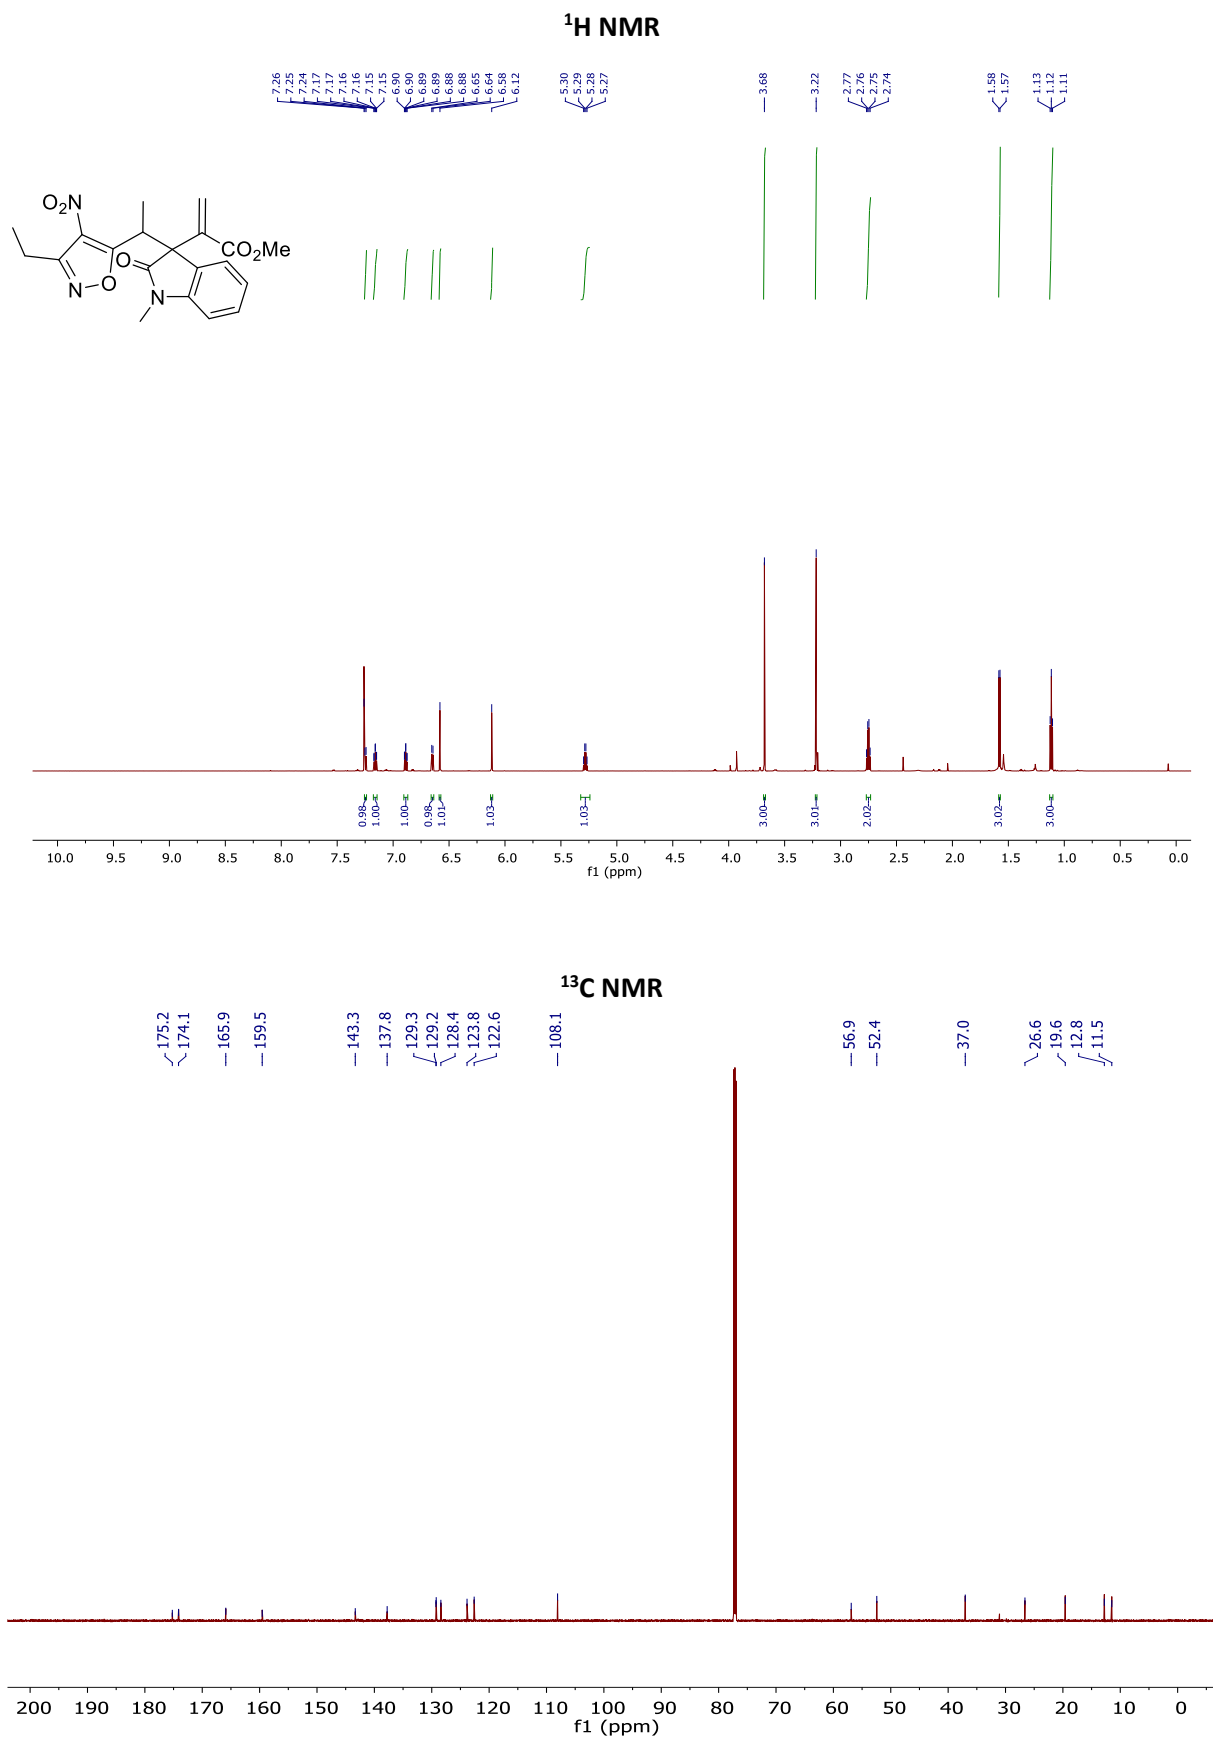

## 5. HPLC traces

### 3a (*R*)-Methyl 4-(3-methyl-4-nitroisoxazol-5-yl)-2-methylene-3-phenylbutanoate (Table 2, entry 1)

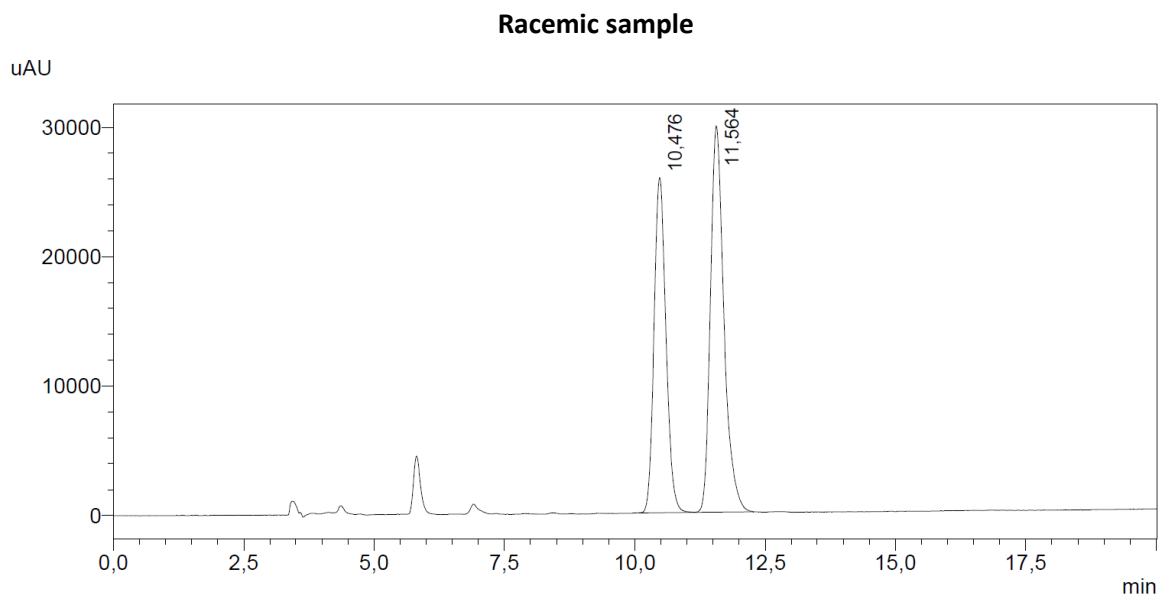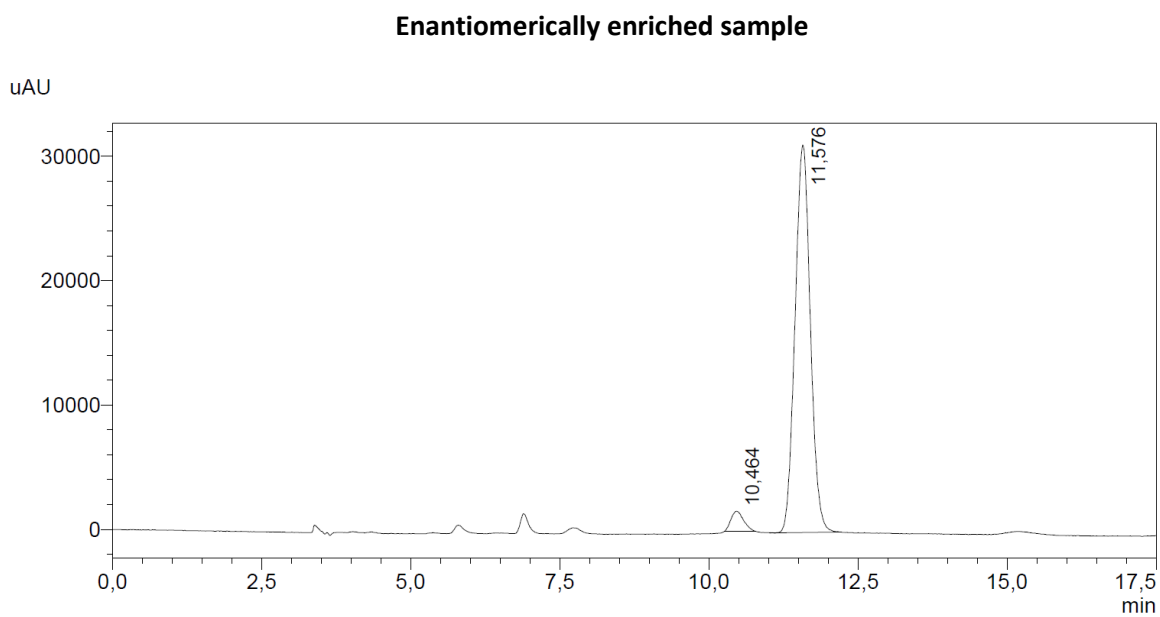

| Peak# | Ret. Time | Area%   |
|-------|-----------|---------|
| 1     | 10,464    | 4,063   |
| 2     | 11,576    | 95,937  |
| Total |           | 100,000 |

**3b (R)-Methyl 4-(3-methyl-4-nitroisoxazol-5-yl)-2-methylene-3-(4-(trifluoromethyl)phenyl) butanoate (Table 2, entry 2)**

**Racemic sample**

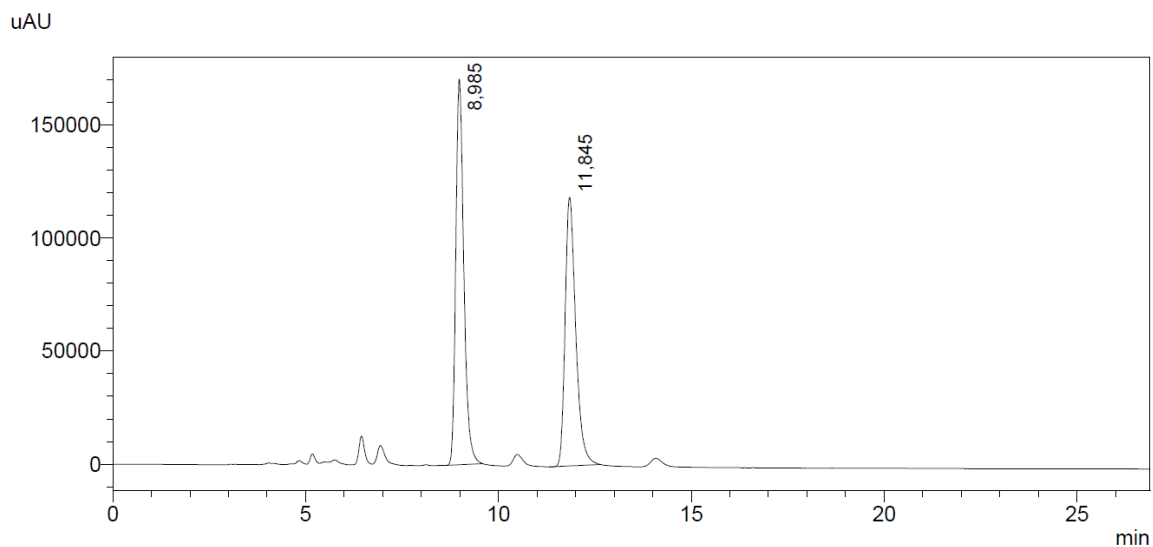

**Enantiomerically enriched sample**

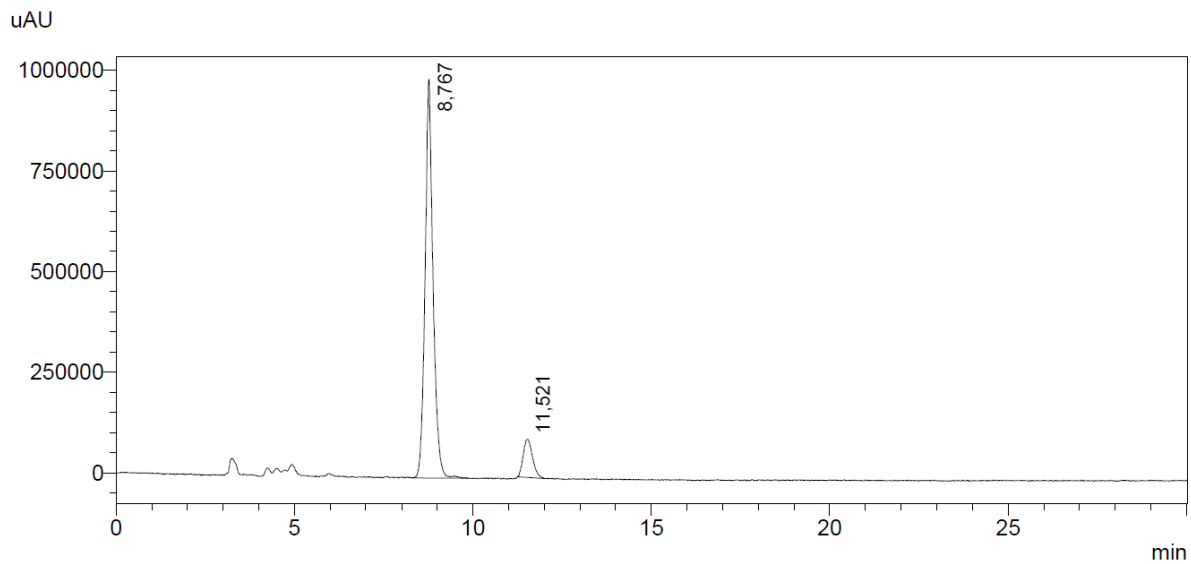

| Peak# | Ret. Time | Area%   |
|-------|-----------|---------|
| 1     | 8,767     | 89,868  |
| 2     | 11,521    | 10,132  |
| Total |           | 100,000 |

**3c (*R*)-Methyl 3-(4-bromophenyl)-4-(3-methyl-4-nitroisoxazol-5-yl)-2-methylenebutanoate (Table 2, entry 3)**

**Racemic sample**

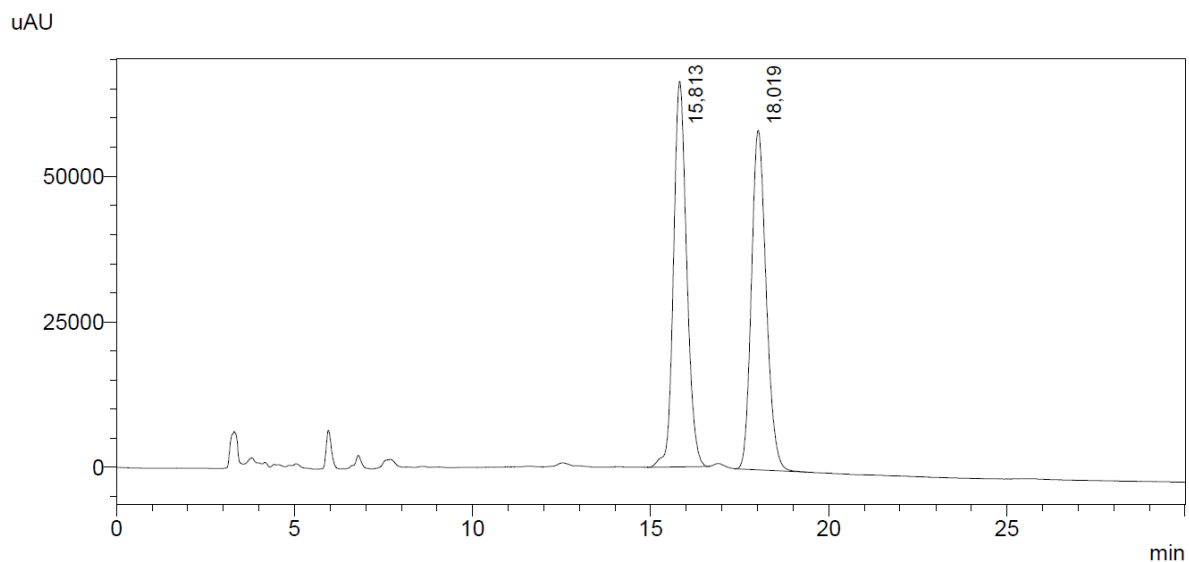

**Enantiomerically enriched sample**

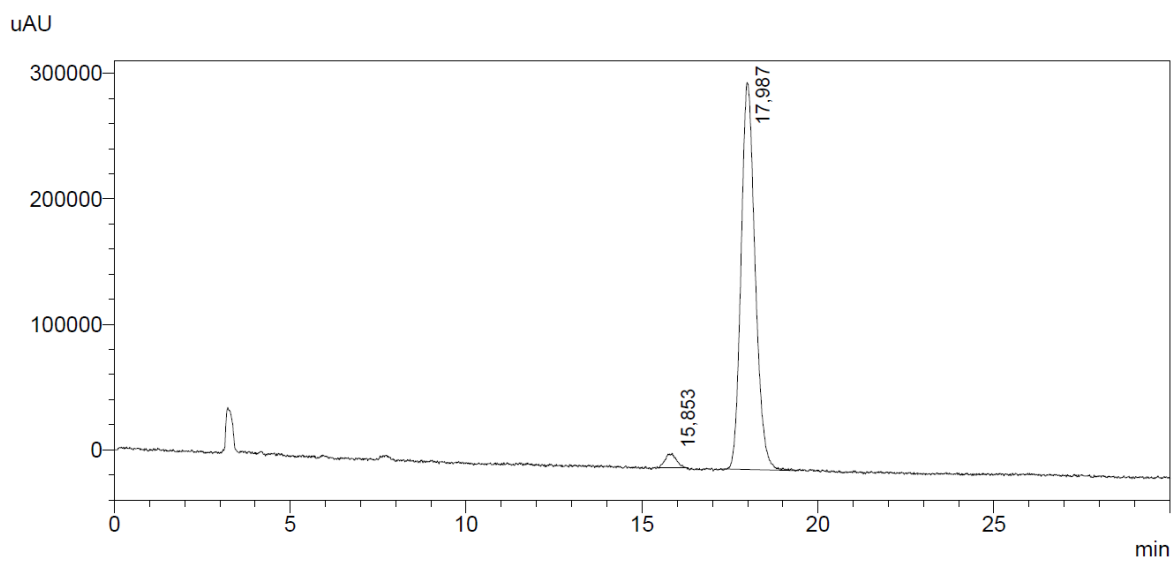

| Peak# | Ret. Time | Area%   |
|-------|-----------|---------|
| 1     | 15,853    | 2,968   |
| 2     | 17,987    | 97,032  |
| Total |           | 100,000 |

**3d (R)-Methyl 3-(4-chlorophenyl)-4-(3-methyl-4-nitroisoxazol-5-yl)-2-methylenebutanoate (Table 2, entry 4)**

**Racemic sample**

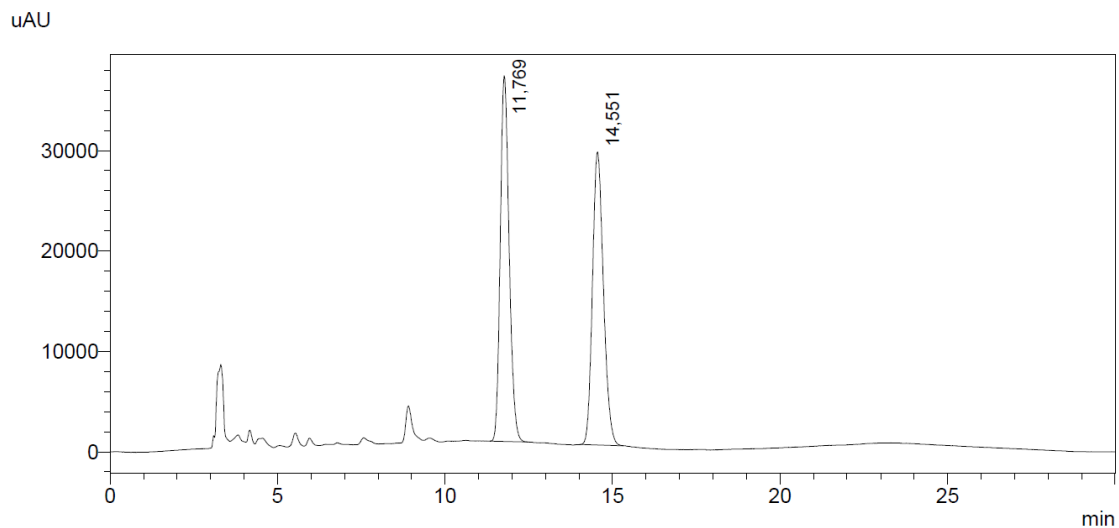

**Enantiomerically enriched sample**

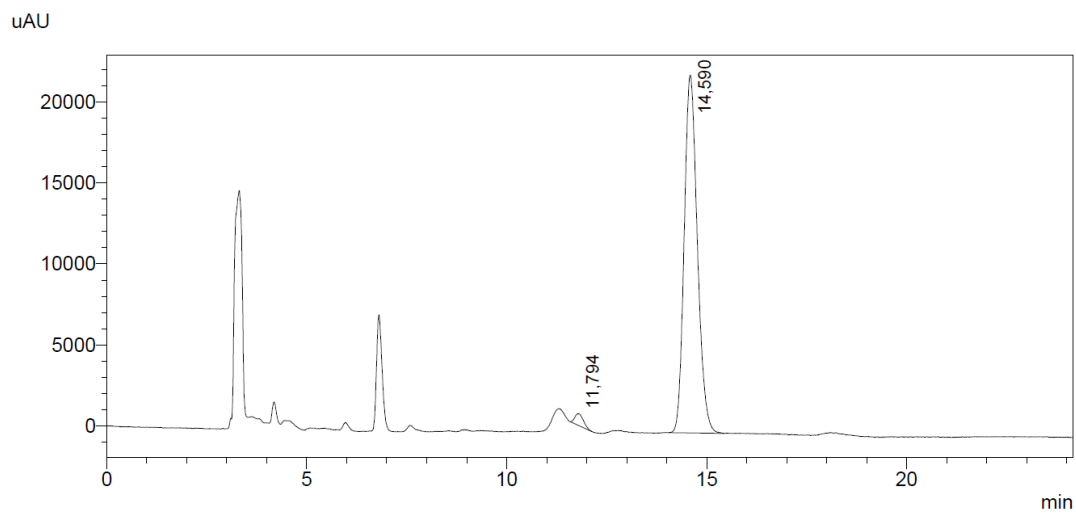

| Peak# | Ret. Time | Area%   |
|-------|-----------|---------|
| 1     | 11,794    | 2,053   |
| 2     | 14,590    | 97,947  |
| Total |           | 100,000 |

**3e (R)-Methyl 3-(3-chlorophenyl)-4-(3-methyl-4-nitroisoxazol-5-yl)-2-methylenebutanoate (Table 2, entry 5)**

**Racemic sample**

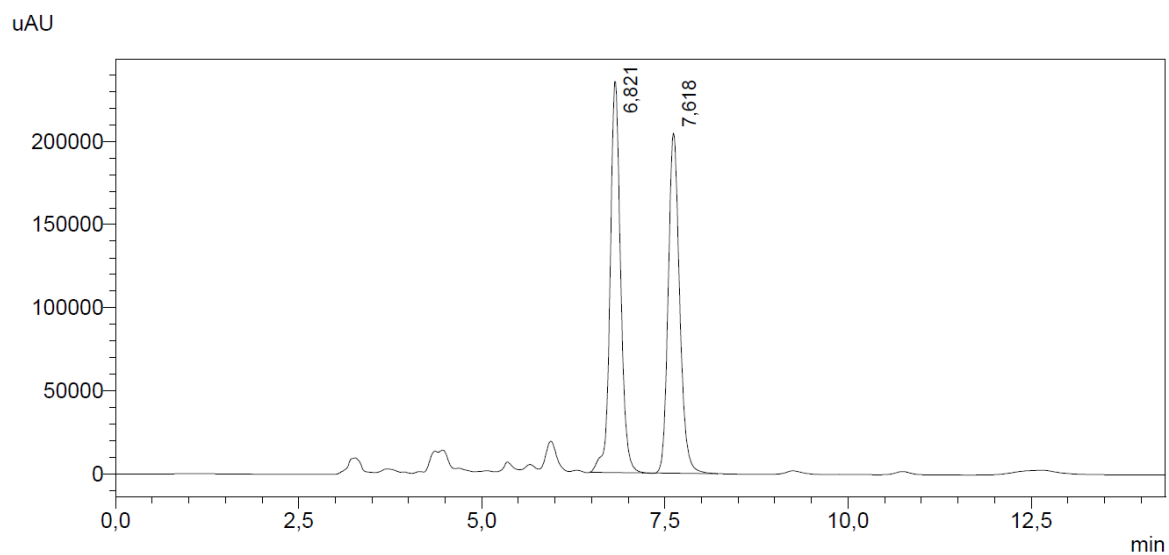

**Enantiomerically enriched sample**

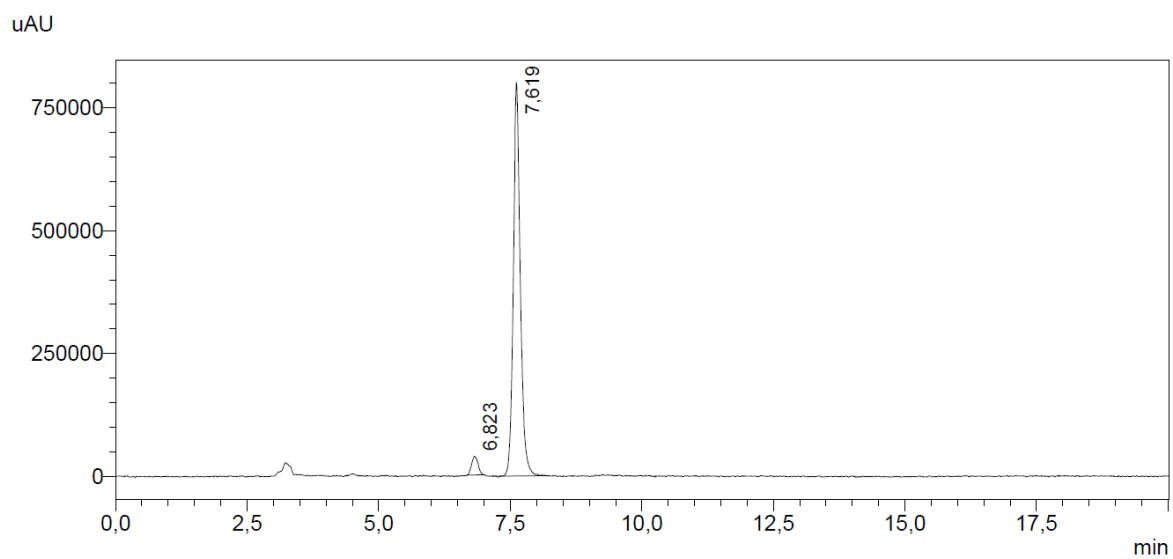

| Peak# | Ret. Time | Area%   |
|-------|-----------|---------|
| 1     | 6,823     | 4,191   |
| 2     | 7,619     | 95,809  |
| Total |           | 100,000 |



**3f (S)-Methyl 3-(2-chlorophenyl)-4-(3-methyl-4-nitroisoxazol-5-yl)-2-methylenebutanoate (Table 2, entry 6)**

**Racemic sample**

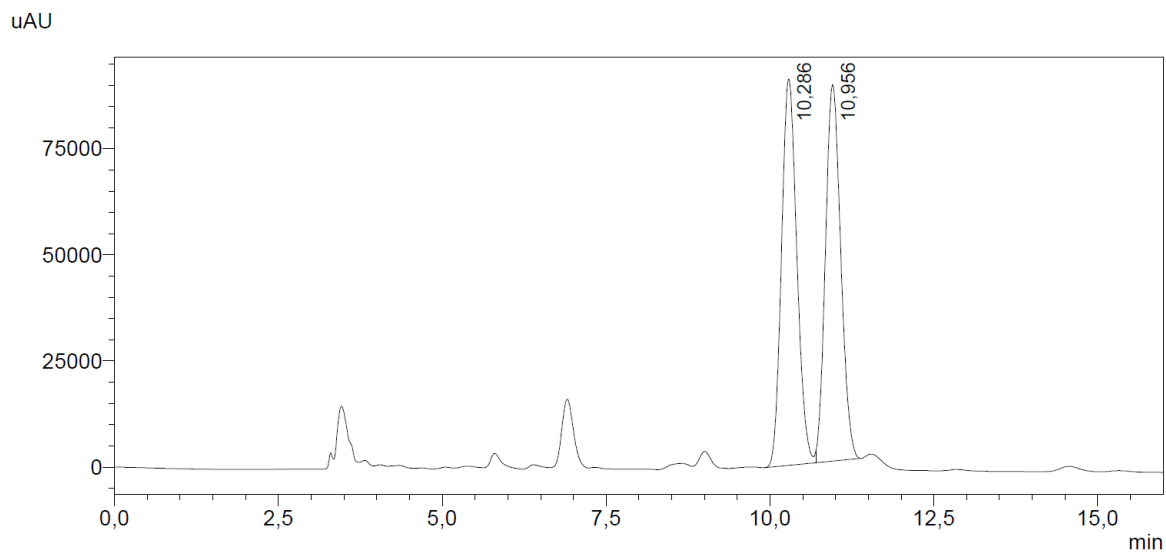

**Enantiomerically enriched sample**

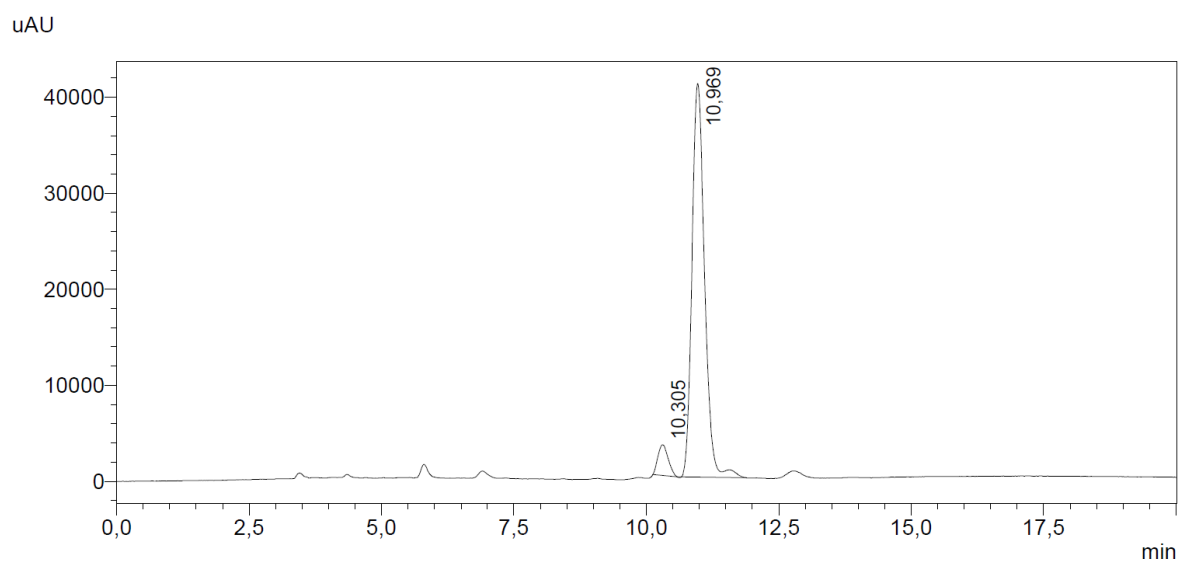

| Peak# | Ret. Time | Area%   |
|-------|-----------|---------|
| 1     | 10,305    | 5,947   |
| 2     | 10,969    | 94,053  |
| Total |           | 100,000 |

**3g (R)-Methyl 4-(3-methyl-4-nitroisoxazol-5-yl)-2-methylene-3-(p-tolyl)butanoate (Table 2, entry 7)**

**Racemic sample**

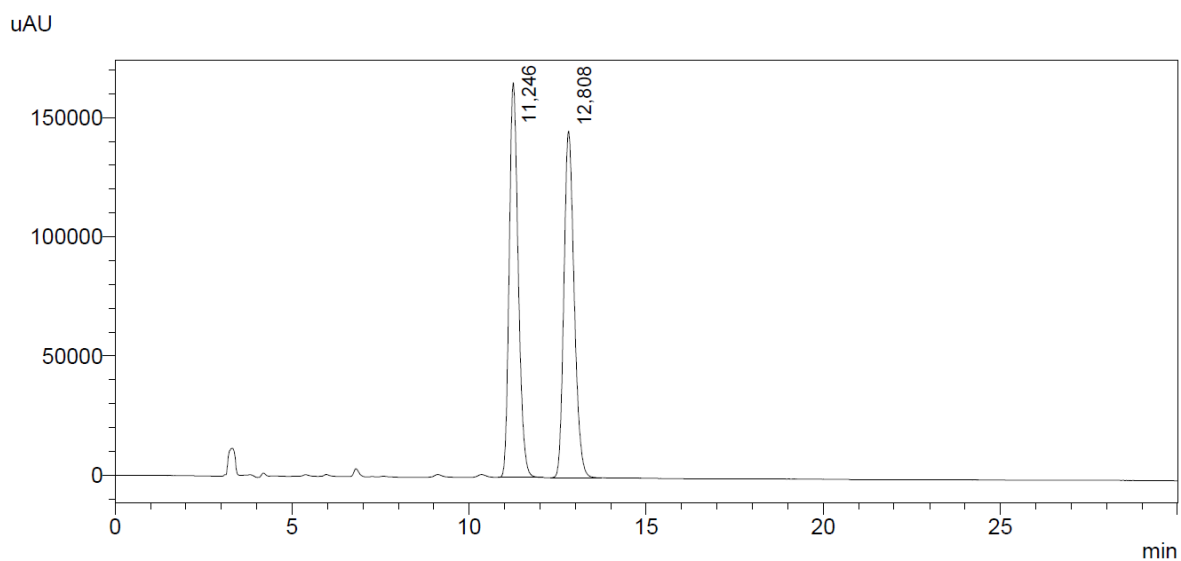

**Enantiomerically enriched sample**

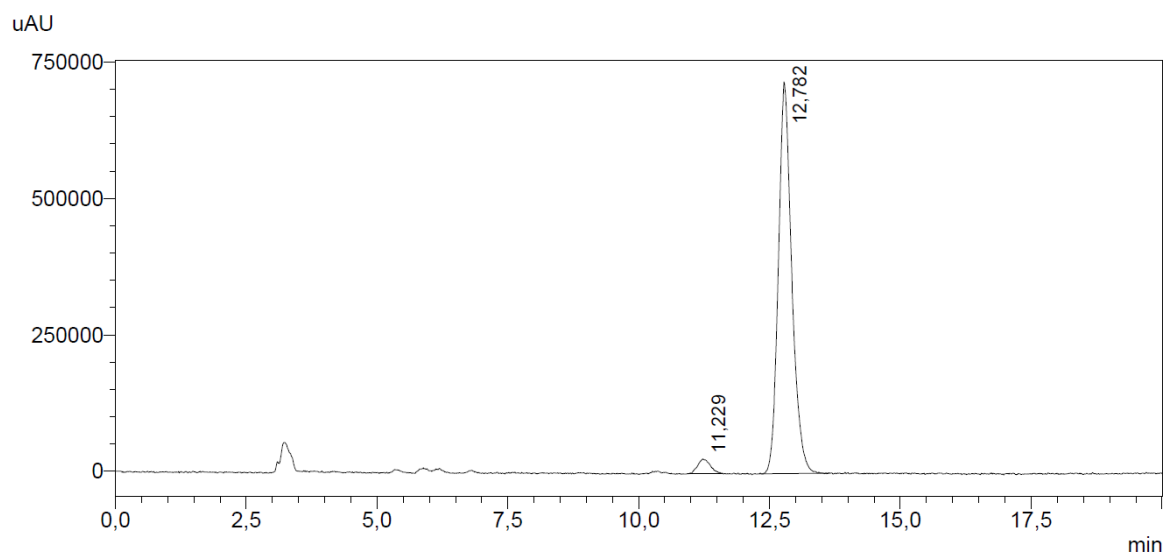

| Peak# | Ret. Time | Area%   |
|-------|-----------|---------|
| 1     | 11,229    | 3,166   |
| 2     | 12,782    | 96,834  |
| Total |           | 100,000 |

**3h (R)-Methyl 3-(4-methoxyphenyl)-4-(3-methyl-4-nitroisoxazol-5-yl)-2-methylenebutanoate (Table 2, entry 8)**

**Racemic sample**

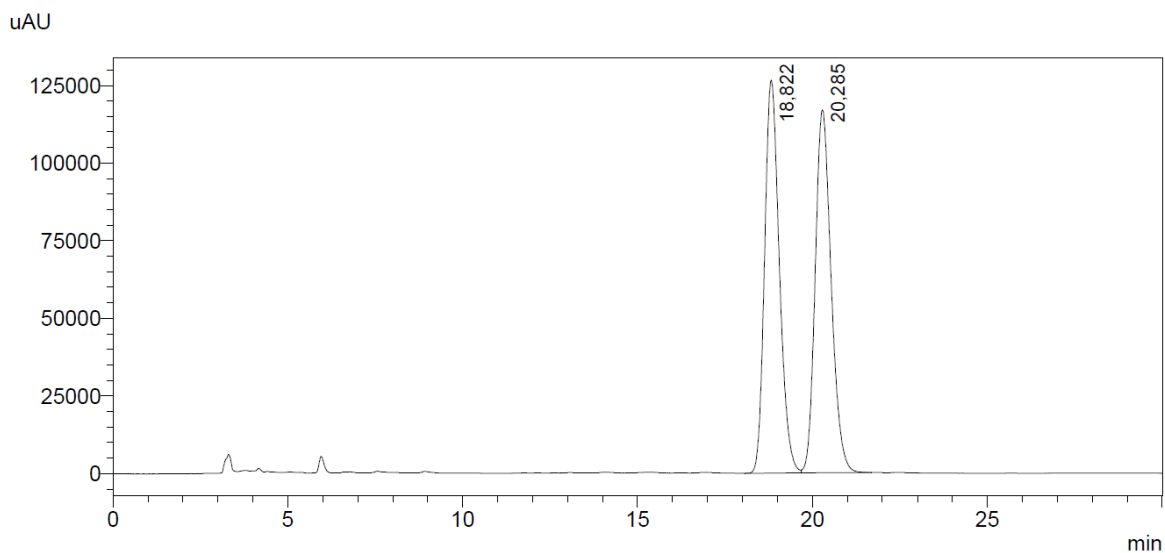

**Enantiomerically enriched sample**

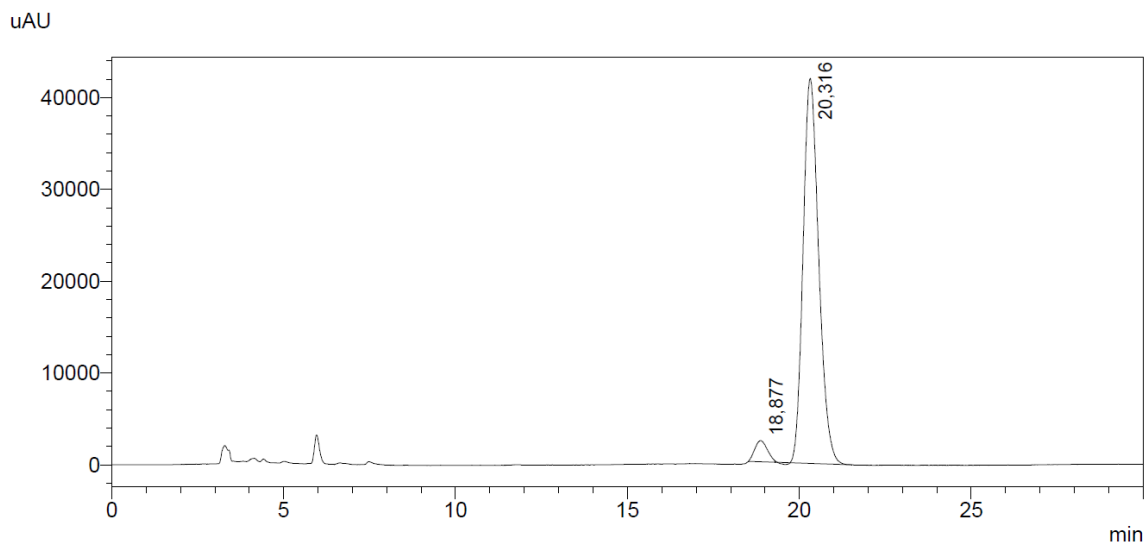

| Peak# | Ret. Time | Area%   |
|-------|-----------|---------|
| 1     | 18,877    | 4,238   |
| 2     | 20,316    | 95,762  |
| Total |           | 100,000 |

**3i (R)-Methyl 3-(benzo[d][1,3]dioxol-5-yl)-4-(3-methyl-4-nitroisoxazol-5-yl)-2-methylenebutanoate  
(Table 2, entry 9)**

**Racemic sample**

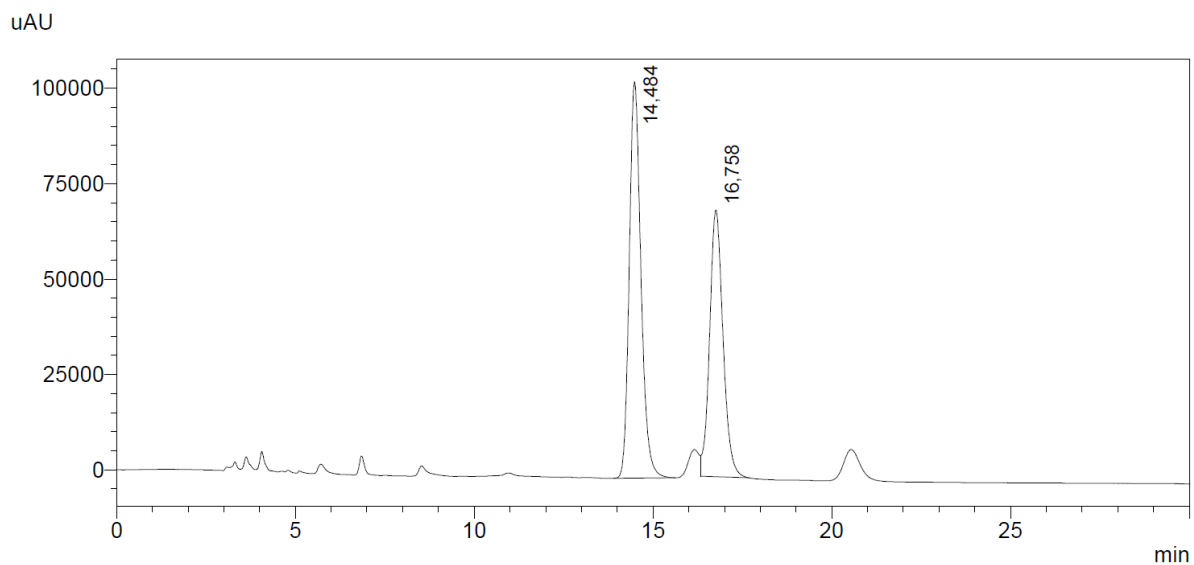

**Enantiomerically enriched sample**

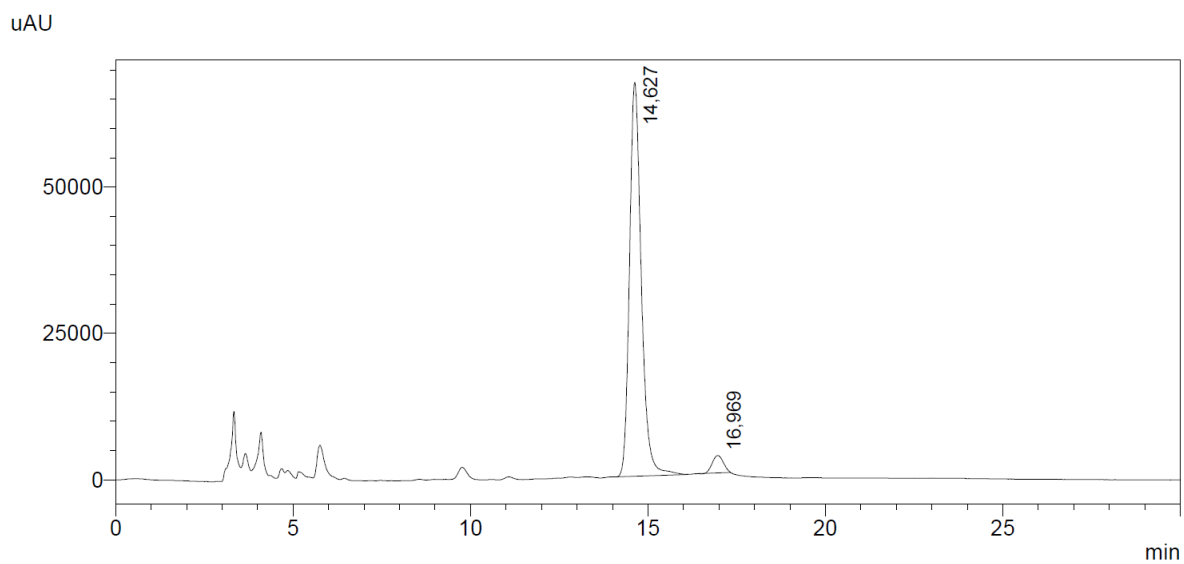

| Peak# | Ret. Time | Area%   |
|-------|-----------|---------|
| 1     | 14,627    | 96,060  |
| 2     | 16,969    | 3,940   |
| Total |           | 100,000 |

**3j (S)-Methyl 3-(furan-2-yl)-4-(3-methyl-4-nitroisoxazol-5-yl)-2-methylenebutanoate (Table 2, entry 10)**

**Racemic sample**

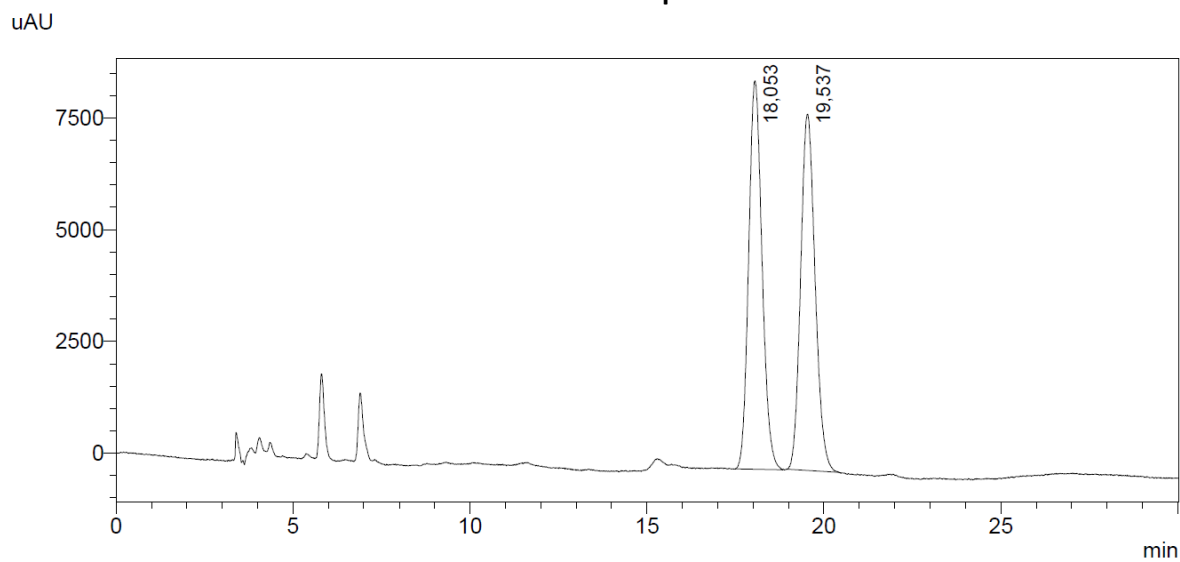

**Enantiomerically enriched sample**

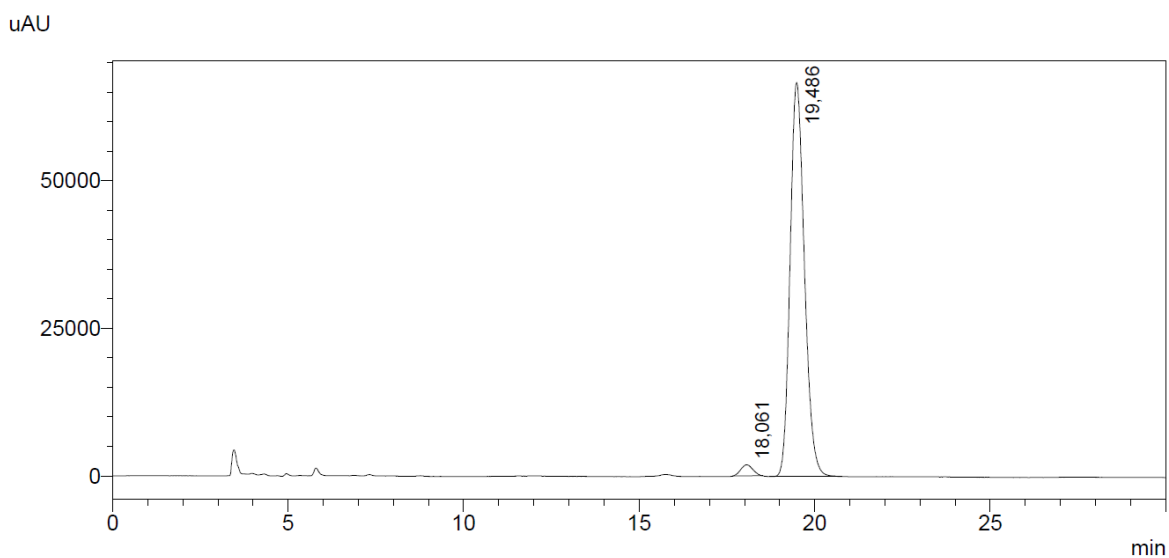

| Peak# | Ret. Time | Area%   |
|-------|-----------|---------|
| 1     | 18,061    | 2,316   |
| 2     | 19,486    | 97,684  |
| Total |           | 100,000 |

**3k (*R,E*)-Methyl 3-((3-methyl-4-nitroisoxazol-5-yl)methyl)-2-methylenehex-4-enoate (Table 2, entry 11)**

**Racemic sample**

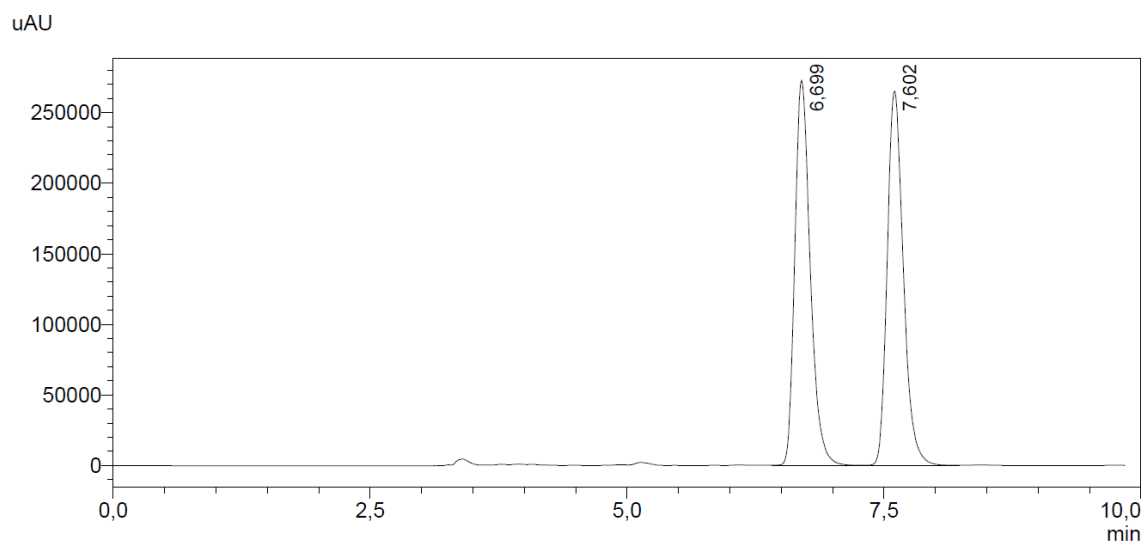

**Enantiomerically enriched sample**

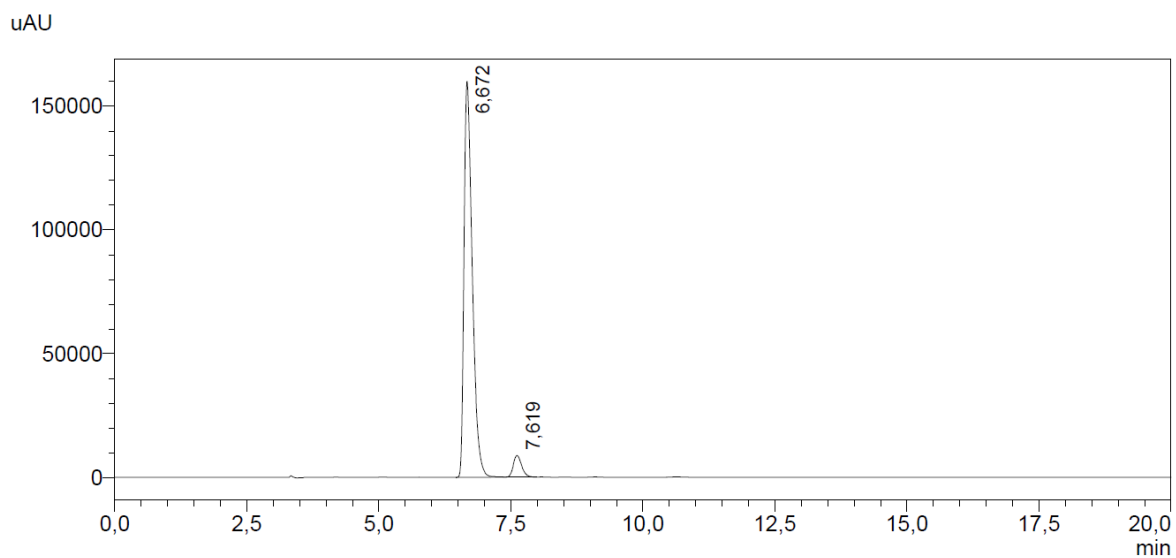

| Peak# | Ret. Time | Area%   |
|-------|-----------|---------|
| 1     | 6,672     | 94,746  |
| 2     | 7,619     | 5,254   |
| Total |           | 100,000 |

**3l (R)-Ethyl 4-(3-methyl-4-nitroisoxazol-5-yl)-2-methylene-3-phenylbutanoate (Table 2, entry 12)**

**Racemic sample**

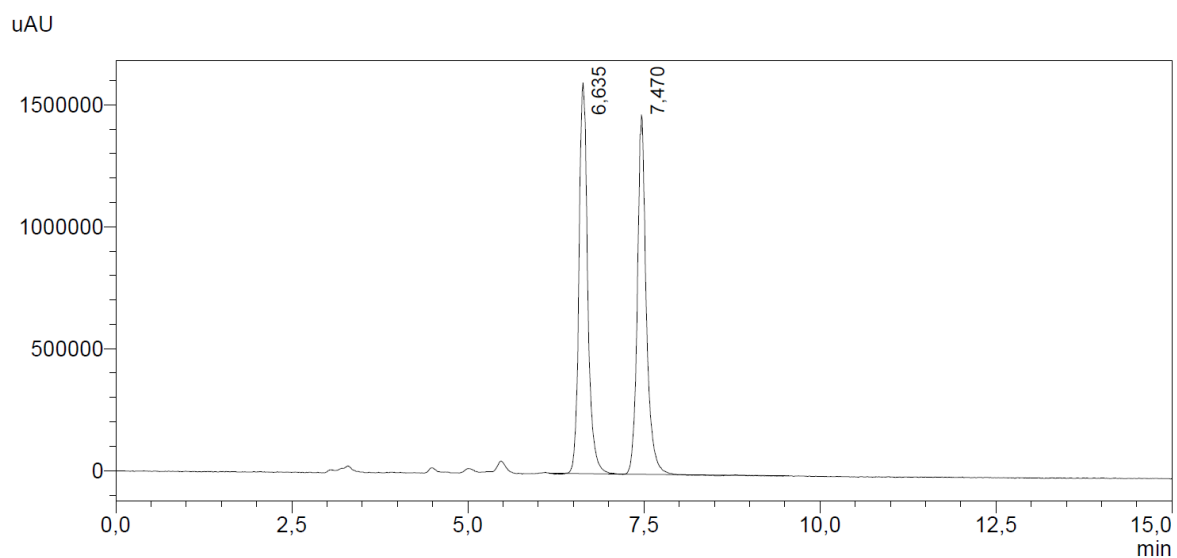

**Enantiomerically enriched sample**

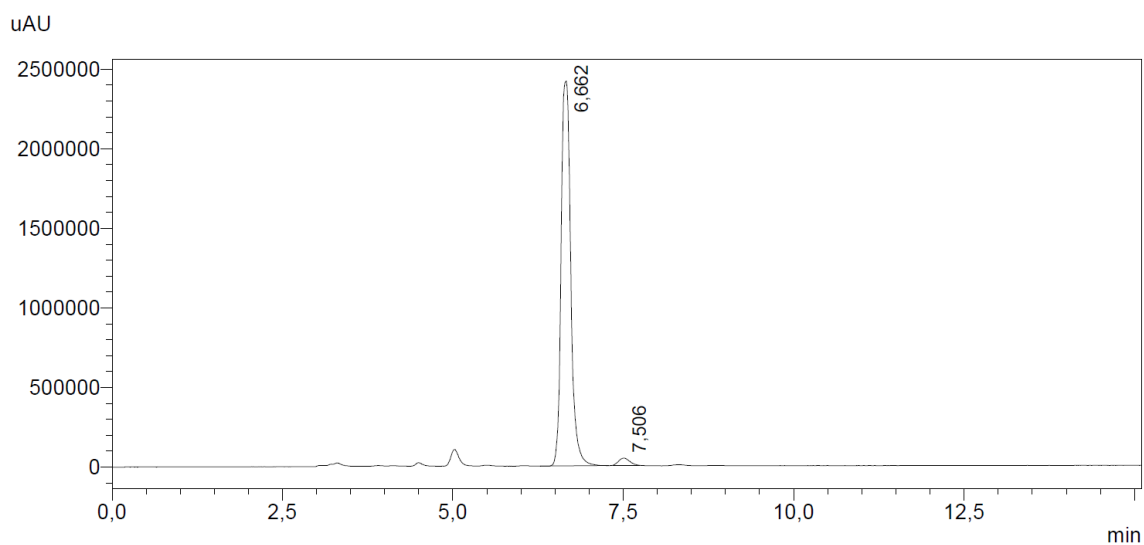

| Peak# | Ret. Time | Area%   |
|-------|-----------|---------|
| 1     | 6,662     | 97,994  |
| 2     | 7,506     | 2,006   |
| Total |           | 100,000 |

**3m (*R*)-*tert*-Butyl 4-(3-methyl-4-nitroisoxazol-5-yl)-2-methylene-3-phenylbutanoate (Table 2, entry 13)**

**Racemic sample**

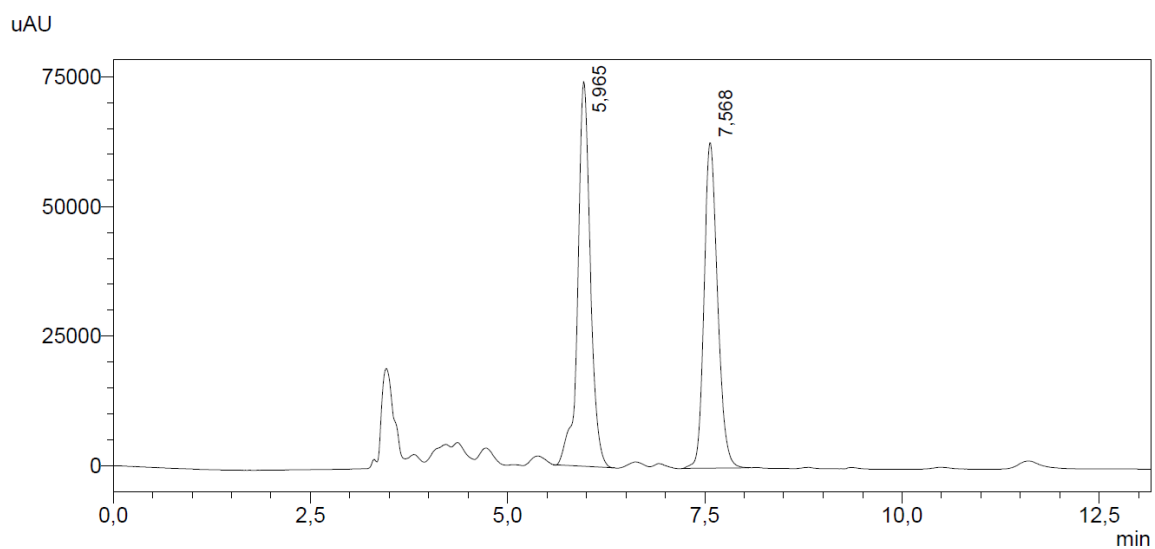

**Enantiomerically enriched sample**

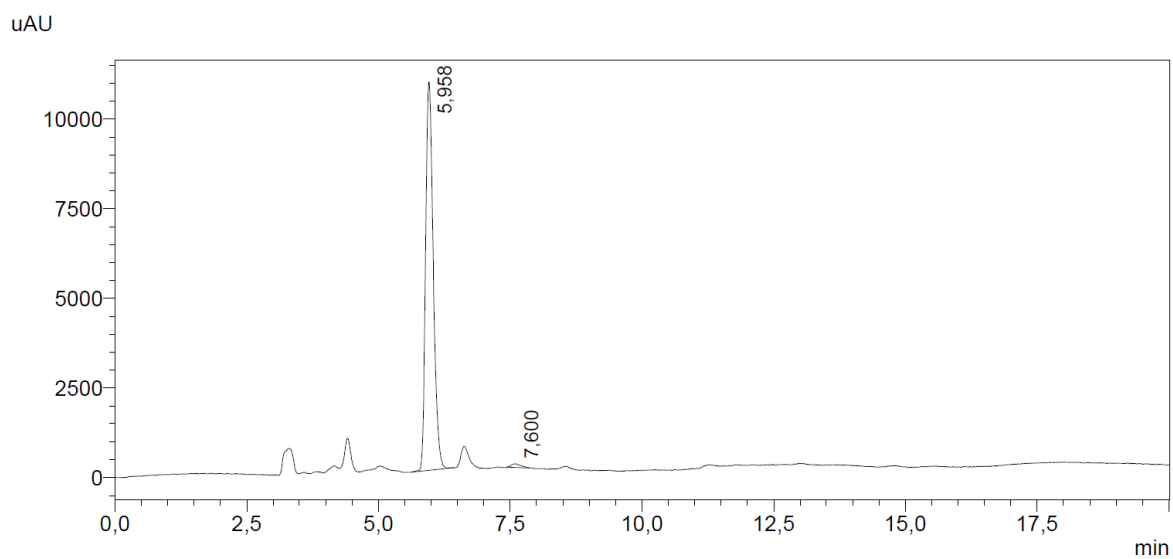

| Peak# | Ret. Time | Area%   |
|-------|-----------|---------|
| 1     | 5,958     | 98,788  |
| 2     | 7,600     | 1,212   |
| Total |           | 100,000 |



**4a (*R*)-Dimethyl 2-methylene-3-phenylpentanedioate (Scheme 3)**

**Racemic sample**

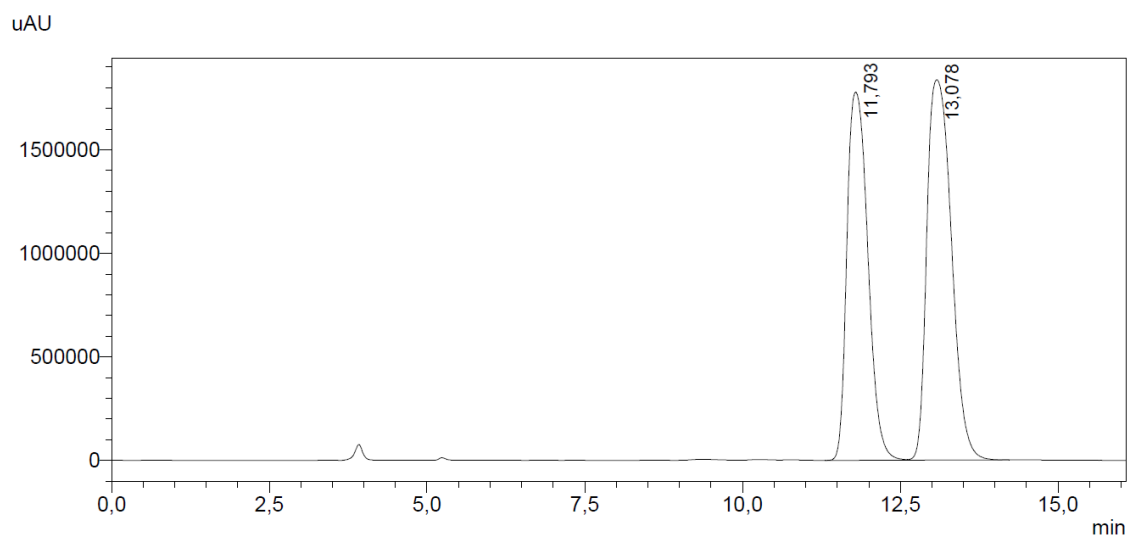

**Enantiomerically enriched sample**

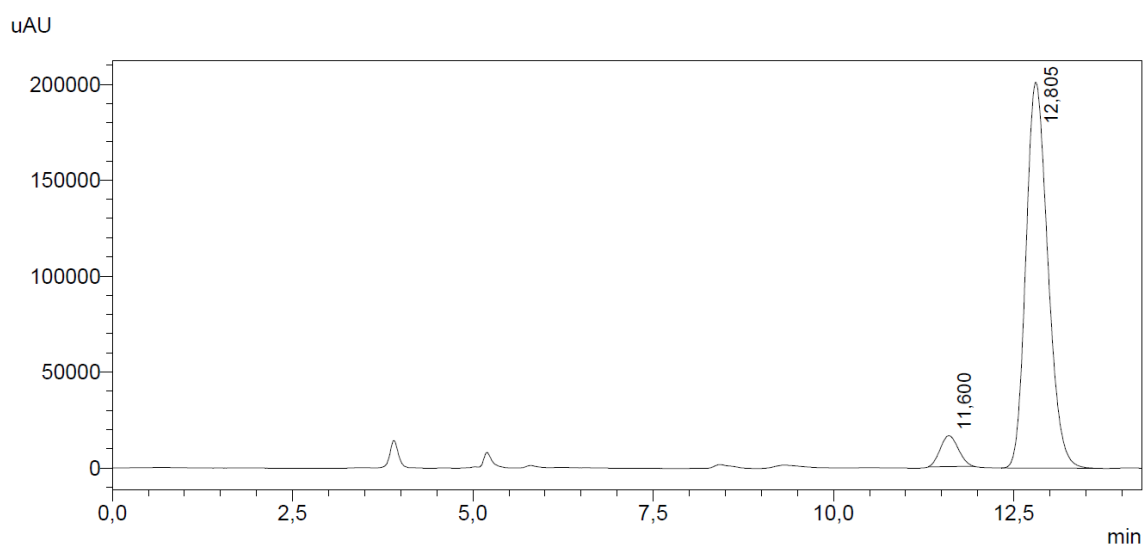

| Peak# | Ret. Time | Area%   |
|-------|-----------|---------|
| 1     | 11,600    | 6,200   |
| 2     | 12,805    | 93,800  |
| Total |           | 100,000 |

**6a (R)-Methyl 4-(4-amino-3-methylisoxazol-5-yl)-2-methylene-3-phenylbutanoate (Scheme 3)**

**Racemic sample**

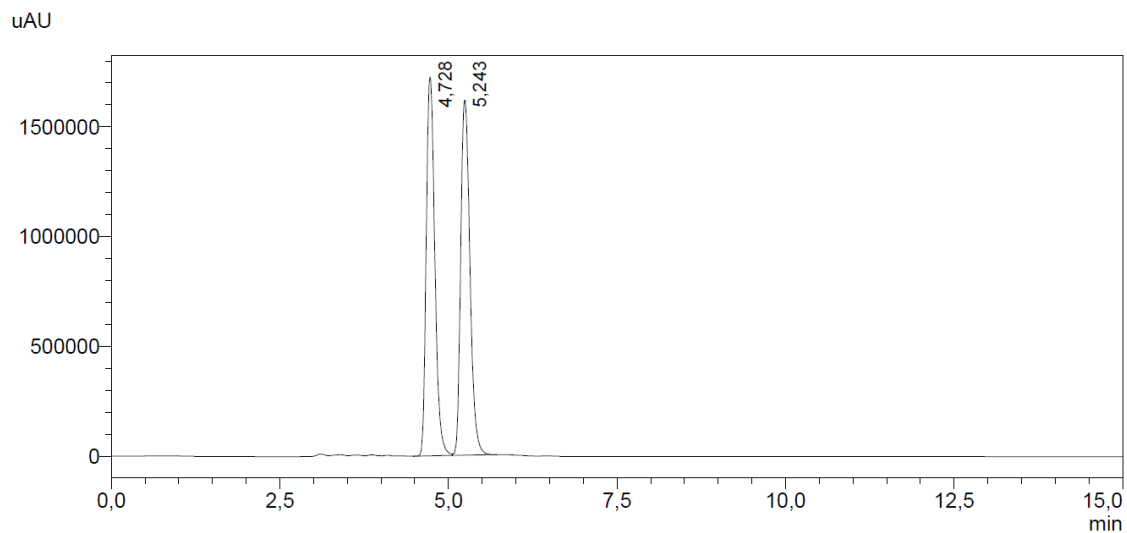

**Enantiomerically enriched sample**

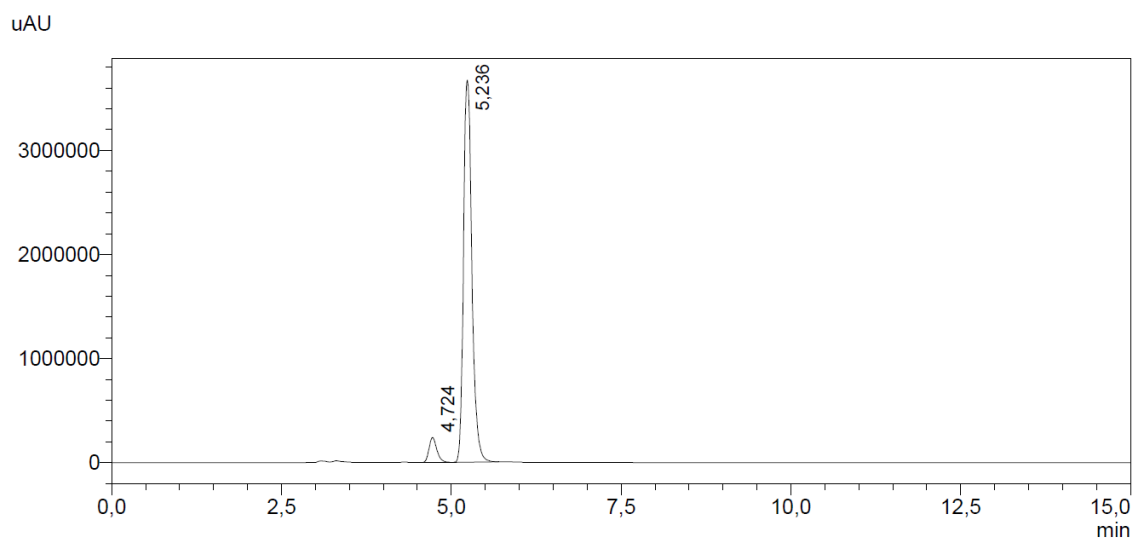

| Peak# | Ret. Time | Area%   |
|-------|-----------|---------|
| 1     | 4,724     | 5,699   |
| 2     | 5,236     | 94,301  |
| Total |           | 100,000 |

**3n (R)-Methyl 2-(1-methyl-3-((3-methyl-4-nitroisoxazol-5-yl)methyl)-2-oxindolin-3-yl)acrylate**

(UPC<sup>2</sup> trace)

Racemic sample

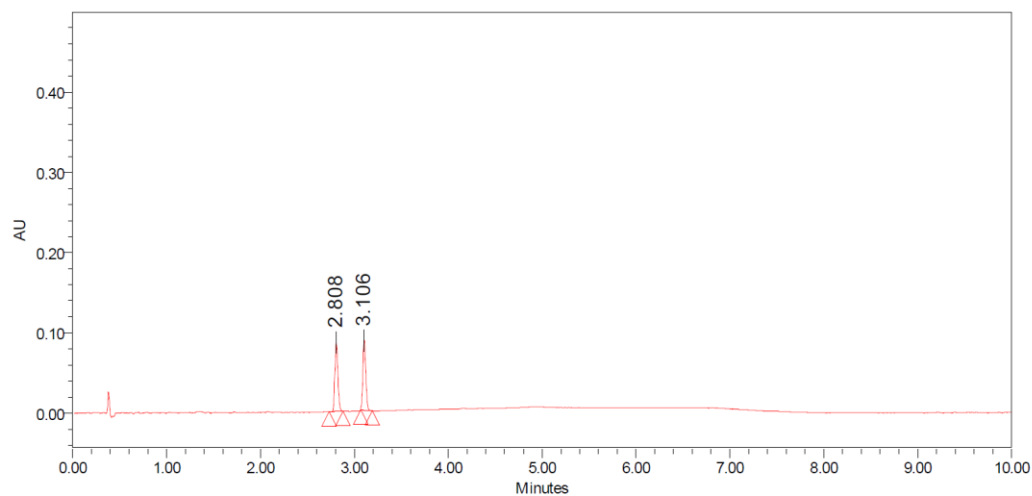

Enantiomerically enriched sample

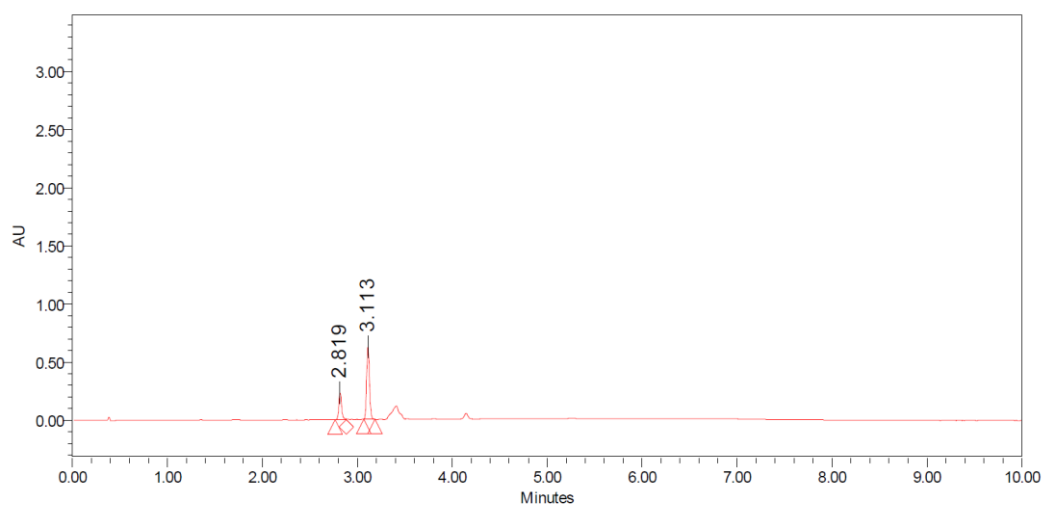

**Peak Results**

|   | RT    | % Area |
|---|-------|--------|
| 1 | 2.819 | 26.82  |
| 2 | 3.113 | 73.18  |

**3o Methyl 2-((R)-3-((S)-1-(3-ethyl-4-nitroisoxazol-5-yl)ethyl)-1-methyl-2-oxindolin-3-yl)acrylate**

**(UPC<sup>2</sup> trace)**

**Racemic sample**

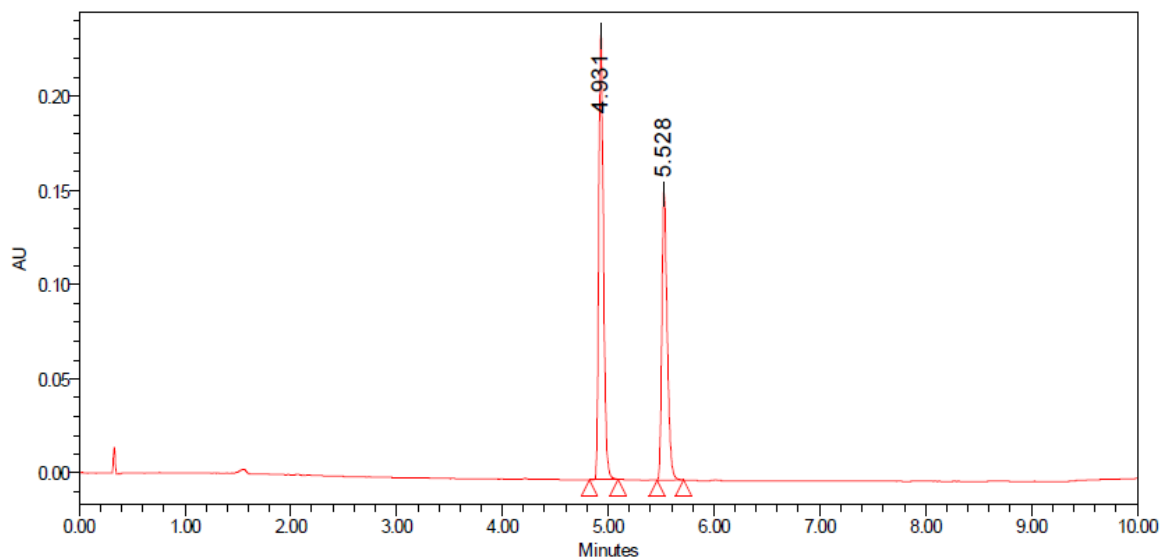

**Enantiomerically enriched sample**

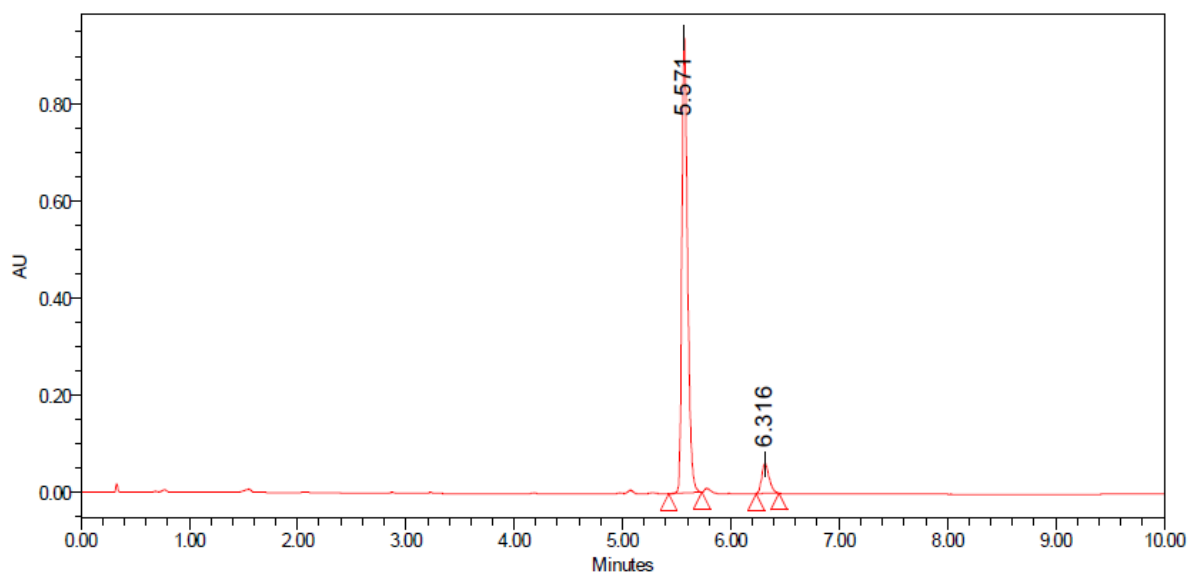

|   | RT    | Area    | % Area |
|---|-------|---------|--------|
| 1 | 5.571 | 3256587 | 91.90  |
| 2 | 6.316 | 287092  | 8.10   |
